# Supplementary material for: Gene expression profiles in neurological tissues during West Nile virus infection: a critical meta-analysis
Source: BMC Genomics. 2018 Jul 13;19:530. doi: 10.1186/s12864-018-4914-4 (PMC6044103; doi:10.1186/s12864-018-4914-4)
Supplement: Supplementary file 2 — Result lists of differential analyses in group 1. The table displays result lists of the differential analyses in group 1. Rows representing those genes, common in the five individual studies of group 1. Two identifiers (‘GeneID’ and ‘Gene Symbol’) are used. Columns 3 to 18 are displaying the outcomes for different analysis variants: Columns, starting with the term ‘early’ are results from the ‘early merging’; same applies for the ‘late merging’. Columns of the individual studies begin with their identifier (see Fig. 2). For each, the p-values (‘.p’) and the adjusted p-values (‘.q’) were calculated. For the early and late merging, the absolute value of the test-statistic was also given out (‘.t.abs’). Columns ‘logFC.min’ and ‘logFC.max’ are showing the gene-wise minimum and maximum values of the logFCs from the individual studies. (XLSX 4787 kb) [file 12864_2018_4914_MOESM2_ESM.xlsx]

## Sheet: Sheet1
GO.ID	nPGenes	early.p	early.q	early.nPGenes	int.p	int.q	int.nPGenes	int.nPGenes	late.p	late.q
GO:0000066 mitochondrial ornithine transport	2	0.982	1	2	0.215	0.364136	2	2	0.939818	1
GO:0000294 nuclear-transcribed mRNA catabolic process, endonucleolytic cleavage-dependent decay	2	0.241	0.986125	2	0.521	0.644086	2	2	0.87735	1
GO:0001575 globoside metabolic process	2	0.826	1	2	0.577	0.694059	2	2	0.761932	1
GO:0001788 antibody-dependent cellular cytotoxicity	4	0.012	0.265631	2	0.117	0.252583	4	2	0.397679	1
GO:0001794 type IIa hypersensitivity	8	0.006	0.184145	2	0.129	0.268408	8	2	0.327411	1
GO:0001796 regulation of type IIa hypersensitivity	8	0.008	0.213546	2	0.151	0.294911	8	2	0.390307	1
GO:0001798 positive regulation of type IIa hypersensitivity	8	0.007	0.199422	2	0.14	0.281909	8	2	0.373707	1
GO:0001802 type III hypersensitivity	4	0.006	0.184145	2	0.094	0.221957	4	2	0.364193	1
GO:0001803 regulation of type III hypersensitivity	4	0.012	0.265631	2	0.119	0.255545	4	2	0.390307	1
GO:0001805 positive regulation of type III hypersensitivity	4	0.012	0.265631	2	0.103	0.234317	4	2	0.390307	1
GO:0001915 negative regulation of T cell mediated cytotoxicity	4	0.051	0.498466	2	0.189	0.338206	4	2	0.397679	1
GO:0001928 regulation of exocyst assembly	2	0.13	0.75735	2	0.189	0.338206	2	2	0.649184	1
GO:0001983 baroreceptor response to increased systemic arterial blood pressure	3	0.754	1	2	0.006	0.0495123	3	2	0.870953	1
GO:0002030 inhibitory G-protein coupled receptor phosphorylation	2	0.531	1	2	0.026	0.103972	2	2	0.61068	1
GO:0002037 negative regulation of L-glutamate transport	2	0.328	1	2	0.331	0.473981	2	2	0.926981	1
GO:0002071 glandular epithelial cell maturation	2	0.746	1	2	0.274	0.419396	2	2	0.910953	1
GO:0002277 myeloid dendritic cell activation involved in immune response	3	0.067	0.564898	2	0.544	0.664448	3	2	0.531271	1
GO:0002282 microglial cell activation involved in immune response	3	0.444	1	2	0.964	0.985329	3	2	0.438729	1
GO:0002352 B cell negative selection	2	0.475	1	2	0.03	0.112276	2	2	0.48735	1
GO:0002436 immune complex clearance by monocytes and macrophages	2	0.019	0.321029	2	0.049	0.148121	2	2	0	0
GO:0002445 type II hypersensitivity	8	0.011	0.255982	2	0.149	0.292904	8	2	0.373707	1
GO:0002488 antigen processing and presentation of endogenous peptide antigen via MHC class Ib via ER pathway	2	0.002	0.102468	2	0.122	0.259839	2	2	0.327411	1
GO:0002489 antigen processing and presentation of endogenous peptide antigen via MHC class Ib via ER pathway, TAP-dependent	2	0.004	0.14689	2	0.133	0.273556	2	2	0.327411	1
GO:0002540 leukotriene production involved in inflammatory response	3	0.02	0.32832	2	0.012	0.0697491	3	2	0.457026	1
GO:0002581 negative regulation of antigen processing and presentation of peptide or polysaccharide antigen via MHC class II	3	0.812	1	2	0.147	0.290337	3	2	0.815734	1
GO:0002582 positive regulation of antigen processing and presentation of peptide or polysaccharide antigen via MHC class II	2	0.396	1	2	0.647	0.75598	2	2	0.48735	1
GO:0002588 positive regulation of antigen processing and presentation of peptide antigen via MHC class II	2	0.37	1	2	0.672	0.777111	2	2	0.490713	1
GO:0002590 negative regulation of antigen processing and presentation of peptide antigen via MHC class I	2	0.042	0.454946	2	0.413	0.54689	2	2	0.48735	1
GO:0002625 regulation of T cell antigen processing and presentation	2	0.08	0.610498	2	0.145	0.287935	2	2	0.827018	1
GO:0002644 negative regulation of tolerance induction	2	0.025	0.357714	2	0.039	0.129228	2	2	0.700744	1
GO:0002652 regulation of tolerance induction dependent upon immune response	2	0.46	1	2	0.362	0.501123	2	2	0.914788	1
GO:0002765 immune response-inhibiting signal transduction	4	0.001	0.0658342	2	0.151	0.294911	4	2	0.353578	1
GO:0002767 immune response-inhibiting cell surface receptor signaling pathway	3	0	0	2	0.125	0.26336	3	2	0.353578	1
GO:0002876 positive regulation of chronic inflammatory response to antigenic stimulus	2	0.229	0.965066	2	0.189	0.338206	2	2	0.822705	1
GO:0002884 negative regulation of hypersensitivity	3	0.31	1	2	0.092	0.21954	3	2	0.598598	1
GO:0002892 regulation of type II hypersensitivity	8	0.01	0.242481	2	0.153	0.297467	8	2	0.353578	1
GO:0002894 positive regulation of type II hypersensitivity	8	0.009	0.228251	2	0.139	0.28091	8	2	0.364193	1
GO:0003051 angiotensin-mediated drinking behavior	3	0.802	1	2	0.046	0.14269	3	2	0.953303	1
GO:0003292 cardiac septum cell differentiation	2	0.997	1	2	0.29	0.434654	2	2	0.827876	1
GO:0003294 atrial ventricular junction remodeling	2	0.347	1	2	0.094	0.221957	2	2	0.41103	1
GO:0003342 proepicardium development	2	0.574	1	2	0.013	0.0729706	2	2	0.856356	1
GO:0003343 septum transversum development	2	0.582	1	2	0.024	0.100289	2	2	0.84977	1
GO:0003349 epicardium-derived cardiac endothelial cell differentiation	2	0.709	1	2	0.447	0.577244	2	2	0.509414	1
GO:0003365 establishment of cell polarity involved in ameboidal cell migration	2	0.302	1	2	0.446	0.576397	2	2	0.700744	1
GO:0003366 cell-matrix adhesion involved in ameboidal cell migration	2	0.496	1	2	0.131	0.271333	2	2	0.664366	1
GO:0003422 growth plate cartilage morphogenesis	2	0.509	1	2	0.193	0.342232	2	2	0.763902	1
GO:0006121 mitochondrial electron transport, succinate to ubiquinone	3	0.667	1	2	0.728	0.819041	3	2	0.739564	1
GO:0006227 dUDP biosynthetic process	3	0.168	0.842387	2	0.437	0.568032	3	2	0.704261	1
GO:0006362 transcription elongation from RNA polymerase I promoter	4	0.611	1	2	0.55	0.66955	4	2	0.550568	1
GO:0006420 arginyl-tRNA aminoacylation	3	0.379	1	2	0.805	0.874129	3	2	0.667034	1
GO:0006423 cysteinyl-tRNA aminoacylation	2	0.875	1	2	0.407	0.541612	2	2	0.605586	1
GO:0006428 isoleucyl-tRNA aminoacylation	2	0.603	1	2	0.938	0.970678	2	2	0.725669	1
GO:0006436 tryptophanyl-tRNA aminoacylation	2	0.412	1	2	0.368	0.505987	2	2	0.866927	1
GO:0006438 valyl-tRNA aminoacylation	3	0.8	1	2	0.478	0.605949	3	2	0.754957	1
GO:0006530 asparagine catabolic process	2	0.068	0.568801	2	0.62	0.732157	2	2	0.433693	1
GO:0006533 aspartate catabolic process	3	0.833	1	2	0.126	0.26469	3	2	0.98818	1
GO:0006538 glutamate catabolic process	4	0.859	1	2	0.133	0.273556	4	2	0.563765	1
GO:0006546 glycine catabolic process	3	0.834	1	2	0.846	0.905977	3	2	0.676168	1
GO:0006554 lysine catabolic process	2	0.318	1	2	0.241	0.390181	2	2	0.721278	1
GO:0006578 amino-acid betaine biosynthetic process	4	0.176	0.859437	2	0.552	0.67155	4	2	0.678723	1
GO:0006583 melanin biosynthetic process from tyrosine	2	0.743	1	2	0.07	0.185403	2	2	0.93379	1
GO:0006601 creatine biosynthetic process	2	0.226	0.959424	2	0.104	0.235596	2	2	0.665704	1
GO:0006788 heme oxidation	2	0.42	1	2	0.13	0.269892	2	2	0.894692	1
GO:0006858 extracellular transport	2	0.508	1	2	0.179	0.327193	2	2	0.694791	1
GO:0007147 female meiosis II	2	0.819	1	2	0.07	0.185403	2	2	0.897031	1
GO:0007208 phospholipase C-activating serotonin receptor signaling pathway	3	0.664	1	2	0.168	0.314413	3	2	0.457026	1
GO:0007529 establishment of synaptic specificity at neuromuscular junction	3	0.994	1	2	0.744	0.830281	3	2	0.531271	1
GO:0008588 release of cytoplasmic sequestered NF-kappaB	3	0.708	1	2	0.449	0.578983	3	2	0.974863	1
GO:0009139 pyrimidine nucleoside diphosphate biosynthetic process	3	0.153	0.80866	2	0.44	0.571094	3	2	0.720171	1
GO:0009149 pyrimidine nucleoside triphosphate catabolic process	2	0.35	1	2	0.631	0.741716	2	2	0.910953	1
GO:0009153 purine deoxyribonucleotide biosynthetic process	2	0.465	1	2	0.003	0.0354075	2	2	0.848113	1
GO:0009196 pyrimidine deoxyribonucleoside diphosphate metabolic process	3	0.159	0.823249	2	0.414	0.547733	3	2	0.757961	1
GO:0009197 pyrimidine deoxyribonucleoside diphosphate biosynthetic process	3	0.185	0.881699	2	0.433	0.564929	3	2	0.751929	1
GO:0009213 pyrimidine deoxyribonucleoside triphosphate catabolic process	2	0.348	1	2	0.615	0.727565	2	2	0.914788	1
GO:0009441 glycolate metabolic process	2	0.279	1	2	0.116	0.251434	2	2	0.772652	1
GO:0009608 response to symbiont	2	0.766	1	2	0.124	0.262134	2	2	0.633018	1
GO:0009609 response to symbiotic bacterium	2	0.771	1	2	0.126	0.26469	2	2	0.64488	1
GO:0010025 wax biosynthetic process	3	0.71	1	2	0.794	0.865492	3	2	0.726758	1
GO:0010044 response to aluminum ion	2	0.064	0.550565	2	0.113	0.24782	2	2	0.422924	1
GO:0010046 response to mycotoxin	3	0.164	0.833847	2	0.018	0.087192	3	2	0.473035	1
GO:0010166 wax metabolic process	3	0.72	1	2	0.821	0.886708	3	2	0.756962	1
GO:0010265 SCF complex assembly	2	0.6	1	2	0.674	0.778289	2	2	0.327411	1
GO:0010615 positive regulation of cardiac muscle adaptation	2	0.462	1	2	0.241	0.390181	2	2	0.725669	1
GO:0010643 cell communication by chemical coupling	3	0.484	1	2	0.106	0.238192	3	2	0.457026	1
GO:0010645 regulation of cell communication by chemical coupling	2	0.357	1	2	0.089	0.215489	2	2	0.438729	1
GO:0010652 positive regulation of cell communication by chemical coupling	2	0.35	1	2	0.111	0.244896	2	2	0.457026	1
GO:0010726 positive regulation of hydrogen peroxide metabolic process	2	0.406	1	2	0.305	0.448521	2	2	0.827876	1
GO:0010730 negative regulation of hydrogen peroxide biosynthetic process	2	0.429	1	2	0.321	0.464788	2	2	0.390307	1
GO:0010808 positive regulation of synaptic vesicle priming	2	0.18	0.867962	2	0.345	0.485489	2	2	0.653415	1
GO:0010813 neuropeptide catabolic process	2	0.487	1	2	0.527	0.649212	2	2	0.503437	1
GO:0010877 lipid transport involved in lipid storage	2	0.237	0.977385	2	0.369	0.506853	2	2	0.52342	1
GO:0010911 regulation of isomerase activity	3	0.048	0.484038	2	0.436	0.567271	3	2	0.448213	1
GO:0010912 positive regulation of isomerase activity	3	0.06	0.532746	2	0.454	0.583831	3	2	0.438729	1
GO:0010920 negative regulation of inositol phosphate biosynthetic process	2	0.01	0.242481	2	0.245	0.393736	2	2	0.457026	1
GO:0010999 regulation of eIF2 alpha phosphorylation by heme	3	0.094	0.655164	2	0.09	0.216725	3	2	0.404563	1
GO:0014004 microglia differentiation	2	0.255	1	2	0.147	0.290337	2	2	0.417135	1
GO:0014005 microglia development	2	0.251	1	2	0.169	0.315618	2	2	0.397679	1
GO:0014057 positive regulation of acetylcholine secretion, neurotransmission	3	0.706	1	2	0.144	0.286781	3	2	0.602121	1
GO:0014839 myoblast migration involved in skeletal muscle regeneration	2	0.061	0.537494	2	0.163	0.308777	2	2	0.41103	1
GO:0014886 transition between slow and fast fiber	2	0.544	1	2	0.131	0.271333	2	2	0.744767	1
GO:0015688 iron chelate transport	2	0.068	0.568801	2	0.185	0.333865	2	2	0.448213	1
GO:0015783 GDP-fucose transport	2	0.906	1	2	0.72	0.813077	2	2	0.721278	1
GO:0015817 histidine transport	2	0.315	1	2	0.866	0.920782	2	2	0.538766	1
GO:0015891 siderophore transport	2	0.07	0.576796	2	0.174	0.321172	2	2	0.443563	1
GO:0016128 phytosteroid metabolic process	3	0.344	1	2	0.07	0.185403	3	2	0.883696	1
GO:0016129 phytosteroid biosynthetic process	3	0.328	1	2	0.072	0.188939	3	2	0.900141	1
GO:0016267 O-glycan processing, core 1	2	0.363	1	2	0.552	0.67155	2	2	0.862068	1
GO:0016554 cytidine to uridine editing	4	0.006	0.184145	2	0.838	0.899457	4	2	0.327411	1
GO:0018171 peptidyl-cysteine oxidation	3	0.61	1	2	0.688	0.789732	3	2	0.771689	1
GO:0018197 peptidyl-aspartic acid modification	3	0.586	1	2	0.73	0.820617	3	2	0.857993	1
GO:0019043 establishment of viral latency	2	0.567	1	2	0.059	0.166175	2	2	0.909415	1
GO:0019060 intracellular transport of viral protein in host cell	2	0.002	0.102468	2	0.324	0.467514	2	2	0.341509	1
GO:0019287 isopentenyl diphosphate biosynthetic process, mevalonate pathway	3	0.211	0.93251	2	0.863	0.91863	3	2	0.814856	1
GO:0019405 alditol catabolic process	2	0.403	1	2	0.269	0.415374	2	2	0.692376	1
GO:0019413 acetate biosynthetic process	2	0.131	0.759692	2	0.559	0.677494	2	2	0.615657	1
GO:0019427 acetyl-CoA biosynthetic process from acetate	2	0.131	0.759692	2	0.559	0.677494	2	2	0.61401	1
GO:0019464 glycine decarboxylation via glycine cleavage system	3	0.84	1	2	0.817	0.883402	3	2	0.664366	1
GO:0019477 L-lysine catabolic process	2	0.29	1	2	0.234	0.384008	2	2	0.723481	1
GO:0019541 propionate metabolic process	3	0.17	0.847732	2	0.693	0.793294	3	2	0.617291	1
GO:0019542 propionate biosynthetic process	2	0.112	0.710825	2	0.547	0.666922	2	2	0.634533	1
GO:0019547 arginine catabolic process to ornithine	2	0.75	1	2	0.014	0.0760606	2	2	0.97264	1
GO:0019918 peptidyl-arginine methylation, to symmetrical-dimethyl arginine	2	0.395	1	2	0.392	0.527807	2	2	0.913256	1
GO:0021538 epithalamus development	3	0.696	1	2	0.279	0.423947	3	2	0.852247	1
GO:0021592 fourth ventricle development	2	0.728	1	2	0.429	0.561462	2	2	0.983005	1
GO:0021762 substantia nigra development	2	0.169	0.845732	2	0.08	0.201573	2	2	0.541192	1
GO:0021769 orbitofrontal cortex development	2	0.552	1	2	0.087	0.212595	2	2	0.555075	1
GO:0021784 postganglionic parasympathetic fiber development	2	0.443	1	2	0.612	0.725269	2	2	0.89078	1
GO:0021812 neuronal-glial interaction involved in cerebral cortex radial glia guided migration	2	0.541	1	2	0.053	0.155228	2	2	0.705424	1
GO:0021836 chemorepulsion involved in postnatal olfactory bulb interneuron migration	2	0.731	1	2	0.285	0.429597	2	2	0.57608	1
GO:0021966 corticospinal neuron axon guidance	2	0.899	1	2	0.298	0.442112	2	2	0.533807	1
GO:0021986 habenula development	3	0.705	1	2	0.288	0.432517	3	2	0.824434	1
GO:0021997 neural plate axis specification	2	0.814	1	2	0.68	0.783175	2	2	0.917083	1
GO:0030581 symbiont intracellular protein transport in host	2	0.001	0.0658342	2	0.342	0.483027	2	2	0.310256	1
GO:0030997 regulation of centriole-centriole cohesion	3	0.95	1	2	0.037	0.125528	3	2	0.754957	1
GO:0031022 nuclear migration along microfilament	2	0.527	1	2	0.981	0.99427	2	2	0.785912	1
GO:0031064 negative regulation of histone deacetylation	2	0.97	1	2	0.432	0.563967	2	2	0.983005	1
GO:0031081 nuclear pore distribution	2	0.821	1	2	0.831	0.894238	2	2	0.866927	1
GO:0031583 phospholipase D-activating G-protein coupled receptor signaling pathway	2	0.28	1	2	0.075	0.193839	2	2	0.461215	1
GO:0031630 regulation of synaptic vesicle fusion to presynaptic active zone membrane	2	0.747	1	2	0.1	0.230557	2	2	0.623712	1
GO:0031959 mineralocorticoid receptor signaling pathway	2	0.383	1	2	0.324	0.467514	2	2	0.559472	1
GO:0032066 nucleolus to nucleoplasm transport	3	0.595	1	2	0.424	0.557145	3	2	0.747853	1
GO:0032202 telomere assembly	4	0.991	1	2	0.645	0.754052	4	2	0.752941	1
GO:0032379 positive regulation of intracellular lipid transport	3	0.057	0.522541	2	0.021	0.0936512	3	2	0.41103	1
GO:0032382 positive regulation of intracellular sterol transport	3	0.05	0.493629	2	0.041	0.133159	3	2	0.41103	1
GO:0032385 positive regulation of intracellular cholesterol transport	3	0.059	0.528297	2	0.037	0.125528	3	2	0.382357	1
GO:0032470 positive regulation of endoplasmic reticulum calcium ion concentration	2	0.4	1	2	0.021	0.0936512	2	2	0.931524	1
GO:0032639 TRAIL production	2	0.724	1	2	0.116	0.251434	2	2	0.483907	1
GO:0032679 regulation of TRAIL production	2	0.714	1	2	0.115	0.250492	2	2	0.515167	1
GO:0032759 positive regulation of TRAIL production	2	0.715	1	2	0.139	0.28091	2	2	0.473035	1
GO:0032764 negative regulation of mast cell cytokine production	2	0.058	0.524518	2	0.023	0.0980969	2	2	0.452697	1
GO:0032804 negative regulation of low-density lipoprotein particle receptor catabolic process	2	0.057	0.522541	2	0.031	0.114175	2	2	0.390307	1
GO:0032902 nerve growth factor production	2	0.232	0.968076	2	0.24	0.389357	2	2	0.56796	1
GO:0032915 positive regulation of transforming growth factor beta2 production	2	0.41	1	2	0.022	0.0959513	2	2	0.984484	1
GO:0033197 response to vitamin E	2	0.057	0.522541	2	0.007	0.0532963	2	2	0.353578	1
GO:0033292 T-tubule organization	2	0.313	1	2	0.309	0.452503	2	2	0.629957	1
GO:0033693 neurofilament bundle assembly	3	0.259	1	2	0.27	0.416448	3	2	0.736406	1
GO:0034125 negative regulation of MyD88-dependent toll-like receptor signaling pathway	2	0.022	0.342144	2	0.977	0.991751	2	2	0.390307	1
GO:0034155 regulation of toll-like receptor 7 signaling pathway	2	0	0	2	0.276	0.421131	2	2	0	0
GO:0034157 positive regulation of toll-like receptor 7 signaling pathway	2	0.002	0.102468	2	0.269	0.415374	2	2	0	0
GO:0034164 negative regulation of toll-like receptor 9 signaling pathway	2	0.315	1	2	0.496	0.622739	2	2	0.689942	1
GO:0034165 positive regulation of toll-like receptor 9 signaling pathway	3	0	0	2	0.331	0.473981	3	2	0	0
GO:0034418 urate biosynthetic process	2	0.19	0.89017	2	0.25	0.398371	2	2	0.874957	1
GO:0034436 glycoprotein transport	3	0.727	1	2	0.138	0.279564	3	2	0.715705	1
GO:0034758 positive regulation of iron ion transport	2	0.002	0.102468	2	0.025	0.102561	2	2	0.382357	1
GO:0034769 basement membrane disassembly	2	0.511	1	2	0.061	0.169871	2	2	0.512317	1
GO:0035408 histone H3-T6 phosphorylation	2	0.242	0.986125	2	0.244	0.392758	2	2	0.756962	1
GO:0035442 dipeptide transmembrane transport	2	0.112	0.710825	2	0.372	0.509626	2	2	0.780279	1
GO:0035526 retrograde transport, plasma membrane to Golgi	2	0.824	1	2	0.797	0.867757	2	2	0.821839	1
GO:0035544 negative regulation of SNARE complex assembly	2	0.608	1	2	0.913	0.954978	2	2	0.927739	1
GO:0035552 oxidative single-stranded DNA demethylation	3	0.842	1	2	0.516	0.64027	3	2	0.71906	1
GO:0035606 peptidyl-cysteine S-trans-nitrosylation	2	0.218	0.946977	2	0.116	0.251434	2	2	0.913256	1
GO:0035607 fibroblast growth factor receptor signaling pathway involved in orbitofrontal cortex development	2	0.557	1	2	0.079	0.200091	2	2	0.563765	1
GO:0035608 protein deglutamylation	6	0.927	1	2	0.951	0.977215	6	2	0.945074	1
GO:0035609 C-terminal protein deglutamylation	3	0.748	1	2	0.808	0.876502	3	2	0.809558	1
GO:0035610 protein side chain deglutamylation	5	0.906	1	2	0.922	0.961321	5	2	0.86854	1
GO:0035621 ER to Golgi ceramide transport	2	0.731	1	2	0.735	0.8239	2	2	0.792396	1
GO:0035698 CD8-positive, alpha-beta cytotoxic T cell extravasation	2	0.404	1	2	0.084	0.207792	2	2	0.855537	1
GO:0035711 T-helper 1 cell activation	2	0.266	1	2	0.044	0.138483	2	2	0.931524	1
GO:0035722 interleukin-12-mediated signaling pathway	2	0.069	0.571894	2	0.15	0.293796	2	2	0.545943	1
GO:0035744 T-helper 1 cell cytokine production	2	0.796	1	2	0.168	0.314413	2	2	0.919374	1
GO:0035983 response to trichostatin A	4	0.952	1	2	0.087	0.212595	4	2	0.875755	1
GO:0035984 cellular response to trichostatin A	4	0.934	1	2	0.101	0.231904	4	2	0.879735	1
GO:0036079 purine nucleotide-sugar transport	2	0.912	1	2	0.719	0.812435	2	2	0.716827	1
GO:0036292 DNA rewinding	2	0.063	0.546029	2	0.497	0.623839	2	2	0.438729	1
GO:0036334 epidermal stem cell homeostasis	2	0.191	0.89124	2	0.173	0.32015	2	2	0.761932	1
GO:0036413 histone H3-R26 citrullination	2	0.475	1	2	0.229	0.379149	2	2	0.693586	1
GO:0042097 interleukin-4 biosynthetic process	4	1	1	2	0.04	0.130814	4	2	0.727844	1
GO:0042271 susceptibility to natural killer cell mediated cytotoxicity	7	0.067	0.564898	2	0.554	0.673168	7	2	0.660314	1
GO:0042369 vitamin D catabolic process	2	0.944	1	2	0.061	0.169871	2	2	0.965219	1
GO:0042489 negative regulation of odontogenesis of dentin-containing tooth	2	0.874	1	2	0.597	0.71237	2	2	0.830444	1
GO:0042495 detection of triacyl bacterial lipopeptide	2	0.005	0.168069	2	0.364	0.502967	2	2	0.373707	1
GO:0042496 detection of diacyl bacterial lipopeptide	2	0.004	0.14689	2	0.327	0.469772	2	2	0.373707	1
GO:0042942 D-serine transport	2	0.044	0.463185	2	0.193	0.342232	2	2	0.390307	1
GO:0044107 cellular alcohol metabolic process	3	0.843	1	2	0.077	0.196913	3	2	0.857175	1
GO:0044108 cellular alcohol biosynthetic process	3	0.861	1	2	0.075	0.193839	3	2	0.864502	1
GO:0044330 canonical Wnt signaling pathway involved in positive regulation of wound healing	2	0.121	0.740215	2	0.212	0.361617	2	2	0.476755	1
GO:0044571 [2Fe-2S] cluster assembly	2	0.698	1	2	0.209	0.35849	2	2	0.857175	1
GO:0044830 modulation by host of viral RNA genome replication	2	0.811	1	2	0.098	0.228041	2	2	0.98818	1
GO:0045041 protein import into mitochondrial intermembrane space	2	0.824	1	2	0.145	0.287935	2	2	0.679992	1
GO:0045082 positive regulation of interleukin-10 biosynthetic process	2	0.669	1	2	0.017	0.0846347	2	2	0.536304	1
GO:0045105 intermediate filament polymerization or depolymerization	2	0.209	0.926895	2	0.21	0.35955	2	2	0.699563	1
GO:0045210 FasL biosynthetic process	2	0.89	1	2	0.153	0.297467	2	2	0.755961	1
GO:0045226 extracellular polysaccharide biosynthetic process	3	0.321	1	2	0.156	0.30093	3	2	0.792396	1
GO:0045329 carnitine biosynthetic process	3	0.14	0.777243	2	0.468	0.596436	3	2	0.681254	1
GO:0045341 MHC class I biosynthetic process	5	0.103	0.683761	2	0.026	0.103972	5	2	0.46921	1
GO:0045343 regulation of MHC class I biosynthetic process	5	0.133	0.763968	2	0.026	0.103972	5	2	0.438729	1
GO:0045345 positive regulation of MHC class I biosynthetic process	5	0.129	0.755682	2	0.049	0.148121	5	2	0.476755	1
GO:0045358 negative regulation of interferon-beta biosynthetic process	2	0.022	0.342144	2	0.462	0.590839	2	2	0.692376	1
GO:0045366 regulation of interleukin-13 biosynthetic process	2	0.694	1	2	0.175	0.322504	2	2	0.682512	1
GO:0045368 positive regulation of interleukin-13 biosynthetic process	2	0.675	1	2	0.15	0.293796	2	2	0.663022	1
GO:0045402 regulation of interleukin-4 biosynthetic process	4	1	1	2	0.038	0.127371	4	2	0.755961	1
GO:0045404 positive regulation of interleukin-4 biosynthetic process	3	0.998	1	2	0.043	0.13688	3	2	0.827018	1
GO:0045658 regulation of neutrophil differentiation	3	0.061	0.537494	2	0.172	0.318966	3	2	0.668358	1
GO:0045716 positive regulation of low-density lipoprotein particle receptor biosynthetic process	2	0.829	1	2	0.141	0.28309	2	2	0.67359	1
GO:0045872 positive regulation of rhodopsin gene expression	2	0.9	1	2	0.205	0.354211	2	2	0.731079	1
GO:0046038 GMP catabolic process	2	0.789	1	2	0.295	0.43961	2	2	0.86612	1
GO:0046077 dUDP metabolic process	3	0.158	0.820412	2	0.408	0.542415	3	2	0.738515	1
GO:0046103 inosine biosynthetic process	2	0.141	0.777243	2	0	0	2	2	0.589521	1
GO:0046124 purine deoxyribonucleoside catabolic process	2	0.065	0.555407	2	0.005	0.0452252	2	2	0.353578	1
GO:0046136 positive regulation of vitamin metabolic process	3	0.043	0.459511	2	0.165	0.311196	3	2	0.438729	1
GO:0046166 glyceraldehyde-3-phosphate biosynthetic process	2	0.291	1	2	0.352	0.492303	2	2	0.676168	1
GO:0046379 extracellular polysaccharide metabolic process	3	0.311	1	2	0.137	0.278249	3	2	0.792396	1
GO:0046440 L-lysine metabolic process	2	0.321	1	2	0.242	0.390875	2	2	0.711177	1
GO:0046476 glycosylceramide biosynthetic process	2	0.387	1	2	0.368	0.505987	2	2	0.830444	1
GO:0046502 uroporphyrinogen III metabolic process	2	0.161	0.826198	2	0.37	0.50781	2	2	0.741654	1
GO:0046725 negative regulation by virus of viral protein levels in host cell	2	0.09	0.645339	2	0.335	0.477349	2	2	0.341509	1
GO:0046967 cytosol to ER transport	2	0.002	0.102468	2	0.322	0.465788	2	2	0.287858	1
GO:0048254 snoRNA localization	4	0.759	1	2	0.728	0.819041	4	2	0.681254	1
GO:0048388 endosomal lumen acidification	2	0.078	0.60431	2	0.074	0.192012	2	2	0.830444	1
GO:0048677 axon extension involved in regeneration	3	0.981	1	2	0.178	0.325958	3	2	0.830444	1
GO:0048682 sprouting of injured axon	3	0.977	1	2	0.192	0.341263	3	2	0.826158	1
GO:0050925 negative regulation of negative chemotaxis	2	0.152	0.806057	2	0.633	0.74366	2	2	0.493999	1
GO:0051030 snRNA transport	2	0.915	1	2	0.536	0.656968	2	2	0.827876	1
GO:0051542 elastin biosynthetic process	2	0.342	1	2	0.022	0.0959513	2	2	0.503437	1
GO:0051664 nuclear pore localization	2	0.836	1	2	0.839	0.900466	2	2	0.878941	1
GO:0051708 intracellular protein transport in other organism involved in symbiotic interaction	2	0.004	0.14689	2	0.347	0.487256	2	2	0	0
GO:0051790 short-chain fatty acid biosynthetic process	4	0.168	0.842387	2	0.813	0.880088	4	2	0.646323	1
GO:0051866 general adaptation syndrome	2	0.3	1	2	0.049	0.148121	2	2	0.781223	1
GO:0051958 methotrexate transport	2	0.776	1	2	0.276	0.421131	2	2	0.861255	1
GO:0052551 response to defense-related nitric oxide production by other organism involved in symbiotic interaction	2	0.003	0.124163	2	0.388	0.524202	2	2	0.364193	1
GO:0052565 response to defense-related host nitric oxide production	2	0	0	2	0.403	0.537809	2	2	0.327411	1
GO:0055005 ventricular cardiac myofibril assembly	3	0.999	1	2	0.267	0.413515	3	2	0.736406	1
GO:0060112 generation of ovulation cycle rhythm	3	0.699	1	2	0.005	0.0452252	3	2	0.899365	1
GO:0060178 regulation of exocyst localization	3	0.313	1	2	0.707	0.803397	3	2	0.827018	1
GO:0060309 elastin catabolic process	2	0.518	1	2	0.301	0.445116	2	2	0.97264	1
GO:0060370 susceptibility to T cell mediated cytotoxicity	3	0.058	0.524518	2	0.307	0.450494	3	2	0.649184	1
GO:0060409 positive regulation of acetylcholine metabolic process	2	0.682	1	2	0.002	0.0287405	2	2	0.943574	1
GO:0060466 activation of meiosis involved in egg activation	2	0.173	0.852983	2	0.03	0.112276	2	2	0.536304	1
GO:0060545 positive regulation of necroptotic process	2	0.07	0.576796	2	0.266	0.412815	2	2	0.528696	1
GO:0060557 positive regulation of vitamin D biosynthetic process	3	0.035	0.413684	2	0.17	0.316817	3	2	0.465273	1
GO:0060559 positive regulation of calcidiol 1-monooxygenase activity	3	0.04	0.444266	2	0.167	0.313515	3	2	0.48735	1
GO:0060595 fibroblast growth factor receptor signaling pathway involved in mammary gland specification	2	0.548	1	2	0.097	0.226519	2	2	0.570023	1
GO:0060615 mammary gland bud formation	2	0.548	1	2	0.064	0.175084	2	2	0.583872	1
GO:0060667 branch elongation involved in salivary gland morphogenesis	2	0.561	1	2	0.101	0.231904	2	2	0.536304	1
GO:0060721 regulation of spongiotrophoblast cell proliferation	2	0.991	1	2	0.341	0.482203	2	2	0.906333	1
GO:0060723 regulation of cell proliferation involved in embryonic placenta development	2	0.994	1	2	0.361	0.500245	2	2	0.896252	1
GO:0060769 positive regulation of epithelial cell proliferation involved in prostate gland development	3	0.961	1	2	0.038	0.127371	3	2	0.714579	1
GO:0060823 canonical Wnt signaling pathway involved in neural plate anterior/posterior pattern formation	2	0.695	1	2	0.17	0.316817	2	2	0.767814	1
GO:0060838 lymphatic endothelial cell fate commitment	2	0.909	1	2	0.012	0.0697491	2	2	0.85881	1
GO:0060849 regulation of transcription involved in lymphatic endothelial cell fate commitment	2	0.897	1	2	0.013	0.0729706	2	2	0.86288	1
GO:0060857 establishment of glial blood-brain barrier	2	0.727	1	2	0.141	0.28309	2	2	0.826158	1
GO:0060915 mesenchymal cell differentiation involved in lung development	2	0.571	1	2	0.106	0.238192	2	2	0.557287	1
GO:0060922 atrioventricular node cell differentiation	2	0.992	1	2	0.248	0.3964	2	2	0.838079	1
GO:0060928 atrioventricular node cell development	2	0.987	1	2	0.3	0.443986	2	2	0.821839	1
GO:0060983 epicardium-derived cardiac vascular smooth muscle cell differentiation	2	0.893	1	2	0.039	0.129228	2	2	0.493999	1
GO:0060994 regulation of transcription from RNA polymerase II promoter involved in kidney development	2	0.824	1	2	0.217	0.366124	2	2	0.906333	1
GO:0060995 cell-cell signaling involved in kidney development	2	0.35	1	2	0.315	0.458702	2	2	0.93756	1
GO:0061107 seminal vesicle development	2	0.117	0.725526	2	0.149	0.292904	2	2	0.428433	1
GO:0061187 regulation of chromatin silencing at rDNA	2	0.978	1	2	0.69	0.791063	2	2	0.801504	1
GO:0061188 negative regulation of chromatin silencing at rDNA	2	0.961	1	2	0.708	0.804291	2	2	0.796972	1
GO:0061198 fungiform papilla formation	4	0.988	1	2	0.034	0.119832	4	2	0.620525	1
GO:0061289 Wnt signaling pathway involved in kidney development	2	0.328	1	2	0.326	0.469096	2	2	0.954049	1
GO:0061290 canonical Wnt signaling pathway involved in metanephric kidney development	2	0.321	1	2	0.298	0.442112	2	2	0.967447	1
GO:0061300 cerebellum vasculature development	2	0.438	1	2	0.226	0.375752	2	2	0.774572	1
GO:0061324 canonical Wnt signaling pathway involved in positive regulation of cardiac outflow tract cell proliferation	2	0.75	1	2	0.034	0.119832	2	2	0.923943	1
GO:0061344 regulation of cell adhesion involved in heart morphogenesis	2	0.865	1	2	0.2	0.349948	2	2	0.688716	1
GO:0061357 positive regulation of Wnt protein secretion	2	0.776	1	2	0.577	0.694059	2	2	0.826158	1
GO:0061386 closure of optic fissure	2	0.648	1	2	0.324	0.467514	2	2	0.543584	1
GO:0061740 protein targeting to lysosome involved in chaperone-mediated autophagy	2	0.041	0.450645	2	0.126	0.26469	2	2	0.585773	1
GO:0061757 leukocyte adhesion to arterial endothelial cell	2	0.212	0.934654	2	0.155	0.300077	2	2	0.417135	1
GO:0061789 dense core granule priming	3	0.202	0.91371	2	0.445	0.575599	3	2	0.992614	1
GO:0061833 protein localization to tricellular tight junction	3	0.918	1	2	0.53	0.651682	3	2	0.705424	1
GO:0070352 positive regulation of white fat cell proliferation	2	0.409	1	2	0.395	0.530944	2	2	0.888425	1
GO:0070358 actin polymerization-dependent cell motility	3	0.058	0.524518	2	0.351	0.49127	3	2	0.686251	1
GO:0070428 regulation of nucleotide-binding oligomerization domain containing 1 signaling pathway	3	0.013	0.27761	2	0.418	0.551861	3	2	0.46921	1
GO:0070489 T cell aggregation	2	0.278	1	2	0.004	0.0409239	2	2	0.598598	1
GO:0070560 protein secretion by platelet	2	0.514	1	2	0.073	0.190402	2	2	0.664366	1
GO:0070564 positive regulation of vitamin D receptor signaling pathway	2	0.983	1	2	0.069	0.183723	2	2	0.790553	1
GO:0070625 zymogen granule exocytosis	2	0.402	1	2	0.305	0.448521	2	2	0.716827	1
GO:0070839 divalent metal ion export	2	0.012	0.265631	2	0.241	0.390181	2	2	0.433693	1
GO:0070947 neutrophil mediated killing of fungus	3	0.1	0.672987	2	0.13	0.269892	3	2	0.591369	1
GO:0071104 response to interleukin-9	2	0.905	1	2	0.054	0.157148	2	2	0.921661	1
GO:0071105 response to interleukin-11	2	0.711	1	2	0.435	0.566312	2	2	0.84228	1
GO:0071349 cellular response to interleukin-12	2	0.101	0.67578	2	0.155	0.300077	2	2	0.528696	1
GO:0071594 thymocyte aggregation	2	0.29	1	2	0.002	0.0287405	2	2	0.585773	1
GO:0072054 renal outer medulla development	2	0.884	1	2	0.037	0.125528	2	2	0.911721	1
GO:0072076 nephrogenic mesenchyme development	3	0.947	1	2	0.023	0.0980969	3	2	0.327411	1
GO:0072135 kidney mesenchymal cell proliferation	2	0.87	1	2	0.028	0.108151	2	2	0.802406	1
GO:0072136 metanephric mesenchymal cell proliferation involved in metanephros development	2	0.881	1	2	0.038	0.127371	2	2	0.788702	1
GO:0072138 mesenchymal cell proliferation involved in ureteric bud development	3	0.656	1	2	0.017	0.0846347	3	2	0.677448	1
GO:0072204 cell-cell signaling involved in metanephros development	2	0.328	1	2	0.307	0.450494	2	2	0.958523	1
GO:0072363 regulation of glycolytic process by positive regulation of transcription from RNA polymerase II promoter	2	0.998	1	2	0.246	0.394669	2	2	0.79879	1
GO:0072368 regulation of lipid transport by negative regulation of transcription from RNA polymerase II promoter	2	0.513	1	2	0.28	0.424824	2	2	0.715705	1
GO:0072369 regulation of lipid transport by positive regulation of transcription from RNA polymerase II promoter	2	0.869	1	2	0.162	0.307579	2	2	0.694791	1
GO:0072385 minus-end-directed organelle transport along microtubule	3	0.413	1	2	0.237	0.386991	3	2	0.936053	1
GO:0072535 tumor necrosis factor (ligand) superfamily member 11 production	2	0.033	0.400859	2	0.001	0.0194072	2	2	0.452697	1
GO:0072697 protein localization to cell cortex	4	0.949	1	2	0.584	0.700354	4	2	0.713449	1
GO:0072708 response to sorbitol	2	0.729	1	2	0.65	0.758543	2	2	0.587655	1
GO:0072750 cellular response to leptomycin B	2	0.932	1	2	0.124	0.262134	2	2	0.578058	1
GO:0080121 AMP transport	2	0.378	1	2	0.278	0.422982	2	2	0.948819	1
GO:0090027 negative regulation of monocyte chemotaxis	5	0.923	1	2	0.335	0.477349	5	2	0.545943	1
GO:0090034 regulation of chaperone-mediated protein complex assembly	2	0.943	1	2	0.122	0.259839	2	2	0.747853	1
GO:0090035 positive regulation of chaperone-mediated protein complex assembly	2	0.951	1	2	0.125	0.26336	2	2	0.725669	1
GO:0090038 negative regulation of protein kinase C signaling	3	0.6	1	2	0.628	0.738881	3	2	0.667034	1
GO:0090076 relaxation of skeletal muscle	2	0.974	1	2	0.016	0.0819592	2	2	0.923943	1
GO:0090088 regulation of oligopeptide transport	2	0.129	0.755682	2	0.356	0.495596	2	2	0.760943	1
GO:0090089 regulation of dipeptide transport	2	0.121	0.740215	2	0.354	0.493999	2	2	0.780279	1
GO:0090116 C-5 methylation of cytosine	2	0.93	1	2	0.159	0.304184	2	2	0.531271	1
GO:0090264 regulation of immune complex clearance by monocytes and macrophages	2	0.018	0.316332	2	0.051	0.151641	2	2	0.25381	1
GO:0090265 positive regulation of immune complex clearance by monocytes and macrophages	2	0.014	0.285071	2	0.044	0.138483	2	2	0.25381	1
GO:0090285 negative regulation of protein glycosylation in Golgi	2	0.731	1	2	0.51	0.635548	2	2	0.898587	1
GO:0090310 negative regulation of methylation-dependent chromatin silencing	3	0.825	1	2	0.005	0.0452252	3	2	0.862068	1
GO:0090481 pyrimidine nucleotide-sugar transmembrane transport	2	0.928	1	2	0.567	0.68493	2	2	0.71906	1
GO:0097117 guanylate kinase-associated protein clustering	2	0.131	0.759692	2	0.212	0.361617	2	2	0.559472	1
GO:0097156 fasciculation of motor neuron axon	2	0.621	1	2	0.093	0.220807	2	2	0.543584	1
GO:0097250 mitochondrial respiratory chain supercomplex assembly	2	0.206	0.921308	2	0.293	0.437669	2	2	0.57608	1
GO:0097274 urea homeostasis	2	0.387	1	2	0.327	0.469772	2	2	0.56796	1
GO:0097477 lateral motor column neuron migration	3	0.207	0.923505	2	0.068	0.182156	3	2	0.817486	1
GO:0098905 regulation of bundle of His cell action potential	2	0.359	1	2	0.119	0.255545	2	2	0.817486	1
GO:0098907 regulation of SA node cell action potential	2	0.454	1	2	0.325	0.468239	2	2	0.634533	1
GO:0098926 postsynaptic signal transduction	2	0.368	1	2	0.157	0.302046	2	2	0.795147	1
GO:0098961 dendritic transport of ribonucleoprotein complex	2	0.206	0.921308	2	0.159	0.304184	2	2	0.852247	1
GO:0098963 dendritic transport of messenger ribonucleoprotein complex	2	0.236	0.974209	2	0.169	0.315618	2	2	0.803305	1
GO:0098964 anterograde dendritic transport of messenger ribonucleoprotein complex	2	0.208	0.92634	2	0.151	0.294911	2	2	0.799696	1
GO:0098971 anterograde dendritic transport of neurotransmitter receptor complex	2	0.813	1	2	0.153	0.297467	2	2	0.989658	1
GO:0099074 mitochondrion to lysosome transport	3	0.982	1	2	0.595	0.710659	3	2	0	0
GO:0099075 mitochondrion-derived vesicle mediated transport	3	0.989	1	2	0.637	0.747601	3	2	0	0
GO:0099527 postsynapse to nucleus signaling pathway	2	0.364	1	2	0.163	0.308777	2	2	0.783105	1
GO:0099566 regulation of postsynaptic cytosolic calcium ion concentration	2	0.745	1	2	0.323	0.466697	2	2	0.57608	1
GO:1900390 regulation of iron ion import	2	0.001	0.0658342	2	0.026	0.103972	2	2	0.364193	1
GO:1900477 negative regulation of G1/S transition of mitotic cell cycle by negative regulation of transcription from RNA polymerase II promoter	2	0.035	0.413684	2	0.296	0.440577	2	2	0.417135	1
GO:1900673 olefin metabolic process	2	0.536	1	2	0.082	0.204389	2	2	0.790553	1
GO:1901080 regulation of relaxation of smooth muscle	2	0.498	1	2	0.352	0.492303	2	2	0.732151	1
GO:1901082 positive regulation of relaxation of smooth muscle	2	0.463	1	2	0.354	0.493999	2	2	0.759952	1
GO:1901189 positive regulation of ephrin receptor signaling pathway	2	0.864	1	2	0.202	0.351731	2	2	0.706583	1
GO:1901303 negative regulation of cargo loading into COPII-coated vesicle	2	0.756	1	2	0.507	0.632857	2	2	0.906333	1
GO:1901344 response to leptomycin B	2	0.949	1	2	0.14	0.281909	2	2	0.583872	1
GO:1901671 positive regulation of superoxide dismutase activity	3	0.261	1	2	0.44	0.571094	3	2	0.438729	1
GO:1901844 regulation of cell communication by electrical coupling involved in cardiac conduction	3	0.974	1	2	0.397	0.532587	3	2	0.679992	1
GO:1902037 negative regulation of hematopoietic stem cell differentiation	3	0.945	1	2	0.156	0.30093	3	2	0.557287	1
GO:1902261 positive regulation of delayed rectifier potassium channel activity	4	0.748	1	2	1	1	4	2	0.622124	1
GO:1902283 negative regulation of primary amine oxidase activity	2	0.949	1	2	0.008	0.0565634	2	2	0	0
GO:1902340 negative regulation of chromosome condensation	2	0.42	1	2	0.128	0.267251	2	2	0.555075	1
GO:1902460 regulation of mesenchymal stem cell proliferation	2	0.904	1	2	0.033	0.118048	2	2	0.6405	1
GO:1902462 positive regulation of mesenchymal stem cell proliferation	2	0.898	1	2	0.024	0.100289	2	2	0.628412	1
GO:1902523 positive regulation of protein K63-linked ubiquitination	2	0.746	1	2	0.011	0.0665836	2	2	0.404563	1
GO:1902524 positive regulation of protein K48-linked ubiquitination	2	0.663	1	2	0.015	0.0789584	2	2	0.397679	1
GO:1902528 regulation of protein linear polyubiquitination	2	0.886	1	2	0.016	0.0819592	2	2	0.827018	1
GO:1902530 positive regulation of protein linear polyubiquitination	2	0.863	1	2	0.014	0.0760606	2	2	0.837236	1
GO:1902567 negative regulation of eosinophil activation	2	0.092	0.65014	2	0.439	0.570238	2	2	0.433693	1
GO:1902617 response to fluoride	2	0.655	1	2	0.226	0.375752	2	2	0.768786	1
GO:1902683 regulation of receptor localization to synapse	3	0.955	1	2	0.363	0.502138	3	2	0.913256	1
GO:1902689 negative regulation of NAD metabolic process	2	0.57	1	2	0.664	0.770285	2	2	0.65481	1
GO:1902722 positive regulation of prolactin secretion	2	0.362	1	2	0.624	0.735554	2	2	0.533807	1
GO:1902728 positive regulation of growth factor dependent skeletal muscle satellite cell proliferation	2	0.014	0.285071	2	0.146	0.289196	2	2	0.404563	1
GO:1902731 negative regulation of chondrocyte proliferation	2	0.278	1	2	0.026	0.103972	2	2	0.634533	1
GO:1902941 regulation of voltage-gated chloride channel activity	2	0.701	1	2	0.038	0.127371	2	2	0.773613	1
GO:1902943 positive regulation of voltage-gated chloride channel activity	2	0.659	1	2	0.04	0.130814	2	2	0.769756	1
GO:1902994 regulation of phospholipid efflux	2	0.879	1	2	0.016	0.0819592	2	2	0.728926	1
GO:1902995 positive regulation of phospholipid efflux	2	0.851	1	2	0.012	0.0697491	2	2	0.76684	1
GO:1903070 negative regulation of ER-associated ubiquitin-dependent protein catabolic process	3	0.768	1	2	0.624	0.735554	3	2	0.84228	1
GO:1903244 positive regulation of cardiac muscle hypertrophy in response to stress	2	0.483	1	2	0.267	0.413515	2	2	0.706583	1
GO:1903335 regulation of vacuolar transport	3	0.712	1	2	0.397	0.532587	3	2	0.743732	1
GO:1903416 response to glycoside	2	0.209	0.926895	2	0.254	0.402445	2	2	0.570023	1
GO:1903547 regulation of growth hormone activity	2	0.587	1	2	0.754	0.83716	2	2	0.86854	1
GO:1903639 regulation of gastrin-induced gastric acid secretion	2	0.23	0.966715	2	0.249	0.397408	2	2	0.517966	1
GO:1903640 negative regulation of gastrin-induced gastric acid secretion	2	0.222	0.954562	2	0.246	0.394669	2	2	0.561631	1
GO:1903650 negative regulation of cytoplasmic transport	2	0.98	1	2	0.473	0.601281	2	2	0.802406	1
GO:1903750 regulation of intrinsic apoptotic signaling pathway in response to hydrogen peroxide	4	0.621	1	2	0.763	0.843484	4	2	0.598598	1
GO:1903751 negative regulation of intrinsic apoptotic signaling pathway in response to hydrogen peroxide	4	0.634	1	2	0.76	0.841093	4	2	0.60386	1
GO:1903989 regulation of ferrous iron import into cell	2	0.002	0.102468	2	0.023	0.0980969	2	2	0.373707	1
GO:1903991 positive regulation of ferrous iron import into cell	2	0	0	2	0.021	0.0936512	2	2	0.364193	1
GO:1904024 negative regulation of glucose catabolic process to lactate via pyruvate	2	0.577	1	2	0.661	0.767869	2	2	0.677448	1
GO:1904049 negative regulation of spontaneous neurotransmitter secretion	2	0.331	1	2	0.597	0.71237	2	2	0.823571	1
GO:1904235 regulation of substrate-dependent cell migration, cell attachment to substrate	2	0.162	0.828652	2	0.086	0.21111	2	2	0.761932	1
GO:1904237 positive regulation of substrate-dependent cell migration, cell attachment to substrate	2	0.158	0.820412	2	0.09	0.216725	2	2	0.802406	1
GO:1904245 regulation of polynucleotide adenylyltransferase activity	2	0.219	0.948726	2	0.344	0.48467	2	2	0.433693	1
GO:1904306 positive regulation of gastro-intestinal system smooth muscle contraction	2	0.666	1	2	0.261	0.408933	2	2	0.443563	1
GO:1904397 negative regulation of neuromuscular junction development	2	0.258	1	2	0.092	0.21954	2	2	0.910953	1
GO:1904432 regulation of ferrous iron binding	2	0.001	0.0658342	2	0.02	0.0915223	2	2	0.310256	1
GO:1904434 positive regulation of ferrous iron binding	2	0.003	0.124163	2	0.02	0.0915223	2	2	0.341509	1
GO:1904435 regulation of transferrin receptor binding	2	0	0	2	0.019	0.0896709	2	2	0.341509	1
GO:1904437 positive regulation of transferrin receptor binding	2	0.001	0.0658342	2	0.014	0.0760606	2	2	0.310256	1
GO:1904444 regulation of establishment of Sertoli cell barrier	2	0.77	1	2	0.037	0.125528	2	2	0.833	1
GO:1904582 positive regulation of intracellular mRNA localization	2	0.017	0.308134	2	0.034	0.119832	2	2	0.433693	1
GO:1904646 cellular response to beta-amyloid	2	0.082	0.616504	2	0.007	0.0532963	2	2	0.848942	1
GO:1904684 negative regulation of metalloendopeptidase activity	4	0.592	1	2	0.495	0.621691	4	2	0.652013	1
GO:1904685 positive regulation of metalloendopeptidase activity	2	0.009	0.228251	2	0.191	0.340329	2	2	0.390307	1
GO:1904717 regulation of AMPA glutamate receptor clustering	2	0.176	0.859437	2	0.547	0.666922	2	2	0.927739	1
GO:1904761 negative regulation of myofibroblast differentiation	2	0.267	1	2	0.222	0.371109	2	2	0.634533	1
GO:1904833 positive regulation of removal of superoxide radicals	3	0.283	1	2	0.448	0.57799	3	2	0.465273	1
GO:1904997 regulation of leukocyte adhesion to arterial endothelial cell	2	0.224	0.956366	2	0.159	0.304184	2	2	0.452697	1
GO:1905165 regulation of lysosomal protein catabolic process	2	0.922	1	2	0.611	0.724426	2	2	0.785912	1
GO:1905258 regulation of nitrosative stress-induced intrinsic apoptotic signaling pathway	2	0.69	1	2	0.156	0.30093	2	2	0.769756	1
GO:1905259 negative regulation of nitrosative stress-induced intrinsic apoptotic signaling pathway	2	0.696	1	2	0.149	0.292904	2	2	0.788702	1
GO:1905277 negative regulation of epithelial tube formation	2	0.52	1	2	0.094	0.221957	2	2	0.948819	1
GO:1905279 regulation of retrograde transport, endosome to Golgi	2	0.112	0.710825	2	0.673	0.77785	2	2	0.629957	1
GO:1905289 regulation of CAMKK-AMPK signaling cascade	2	0.329	1	2	0.641	0.751125	2	2	0.679992	1
GO:1990009 retinal cell apoptotic process	2	0.955	1	2	0.01	0.0633039	2	2	0.86288	1
GO:1990164 histone H2A phosphorylation	2	0.963	1	2	0.837	0.898832	2	2	0.874957	1
GO:1990379 lipid transport across blood brain barrier	2	0.862	1	2	0.188	0.337258	2	2	0.743732	1
GO:1990709 presynaptic active zone organization	3	0.368	1	2	0.481	0.608268	3	2	0.652013	1
GO:1990927 calcium ion regulated lysosome exocytosis	2	0.599	1	2	0.498	0.624678	2	2	0.517966	1
GO:2000016 negative regulation of determination of dorsal identity	2	0.022	0.342144	2	0.314	0.457822	2	2	0.461215	1
GO:2000137 negative regulation of cell proliferation involved in heart morphogenesis	2	0.878	1	2	0.031	0.114175	2	2	0.652013	1
GO:2000173 negative regulation of branching morphogenesis of a nerve	4	0.859	1	2	0.117	0.252583	4	2	0.846452	1
GO:2000277 positive regulation of oxidative phosphorylation uncoupler activity	2	0.301	1	2	0.014	0.0760606	2	2	0.901693	1
GO:2000295 regulation of hydrogen peroxide catabolic process	2	0.032	0.397451	2	0.159	0.304184	2	2	0.404563	1
GO:2000307 regulation of tumor necrosis factor (ligand) superfamily member 11 production	2	0.026	0.363029	2	0.006	0.0495123	2	2	0.48735	1
GO:2000309 positive regulation of tumor necrosis factor (ligand) superfamily member 11 production	2	0.032	0.397451	2	0.006	0.0495123	2	2	0.461215	1
GO:2000342 negative regulation of chemokine (C-X-C motif) ligand 2 production	2	0.326	1	2	0.159	0.304184	2	2	0.657576	1
GO:2000349 negative regulation of CD40 signaling pathway	2	0.06	0.532746	2	0.357	0.496392	2	2	0.41103	1
GO:2000371 regulation of DNA topoisomerase (ATP-hydrolyzing) activity	2	0.059	0.528297	2	0.349	0.489152	2	2	0.404563	1
GO:2000373 positive regulation of DNA topoisomerase (ATP-hydrolyzing) activity	2	0.049	0.487926	2	0.355	0.494845	2	2	0.428433	1
GO:2000439 positive regulation of monocyte extravasation	2	0.463	1	2	0.08	0.201573	2	2	0.465273	1
GO:2000451 positive regulation of CD8-positive, alpha-beta T cell extravasation	2	0.368	1	2	0.048	0.146273	2	2	0.872557	1
GO:2000452 regulation of CD8-positive, alpha-beta cytotoxic T cell extravasation	2	0.378	1	2	0.102	0.233488	2	2	0.883696	1
GO:2000471 regulation of hematopoietic stem cell migration	2	0.086	0.632725	2	0.057	0.163043	2	2	0.364193	1
GO:2000473 positive regulation of hematopoietic stem cell migration	2	0.093	0.653572	2	0.05	0.149702	2	2	0.41103	1
GO:2000474 regulation of opioid receptor signaling pathway	3	0.949	1	2	0.168	0.314413	3	2	0.86612	1
GO:2000521 negative regulation of immunological synapse formation	2	0.021	0.333533	2	0.385	0.521553	2	2	0.443563	1
GO:2000547 regulation of dendritic cell dendrite assembly	3	0.257	1	2	0.048	0.146273	3	2	0.907875	1
GO:2000588 positive regulation of platelet-derived growth factor receptor-beta signaling pathway	2	0.457	1	2	0.442	0.573048	2	2	0.920899	1
GO:2000625 regulation of miRNA catabolic process	2	0.197	0.903966	2	0.815	0.881809	2	2	0.64488	1
GO:2000627 positive regulation of miRNA catabolic process	2	0.191	0.89124	2	0.813	0.880088	2	2	0.628412	1
GO:2000642 negative regulation of early endosome to late endosome transport	2	0.979	1	2	0.467	0.595514	2	2	0.786844	1
GO:2000669 negative regulation of dendritic cell apoptotic process	2	0.168	0.842387	2	0.105	0.237041	2	2	0.65481	1
GO:2000707 positive regulation of dense core granule biogenesis	2	0.306	1	2	0.046	0.14269	2	2	0.820971	1
GO:2000790 regulation of mesenchymal cell proliferation involved in lung development	2	0.61	1	2	0.212	0.361617	2	2	0.493999	1
GO:2000791 negative regulation of mesenchymal cell proliferation involved in lung development	2	0.595	1	2	0.215	0.364136	2	2	0.509414	1
GO:2000878 positive regulation of oligopeptide transport	2	0.123	0.745273	2	0.363	0.502138	2	2	0.775528	1
GO:2000880 positive regulation of dipeptide transport	2	0.124	0.748122	2	0.358	0.497415	2	2	0.760943	1
GO:2001027 negative regulation of endothelial cell chemotaxis	3	0.168	0.842387	2	0.261	0.408933	3	2	0.364193	1
GO:2001148 regulation of dipeptide transmembrane transport	2	0.101	0.67578	2	0.357	0.496392	2	2	0.772652	1
GO:2001150 positive regulation of dipeptide transmembrane transport	2	0.113	0.713962	2	0.366	0.504343	2	2	0.788702	1
GO:2001188 regulation of T cell activation via T cell receptor contact with antigen bound to MHC molecule on antigen presenting cell	2	0.018	0.316332	2	0.376	0.512913	2	2	0.417135	1
GO:2001189 negative regulation of T cell activation via T cell receptor contact with antigen bound to MHC molecule on antigen presenting cell	2	0.015	0.292765	2	0.351	0.49127	2	2	0.457026	1
GO:2001202 negative regulation of transforming growth factor-beta secretion	2	0.164	0.833847	2	0.101	0.231904	2	2	0.786844	1
GO:2001287 negative regulation of caveolin-mediated endocytosis	2	0.999	1	2	0.373	0.510439	2	2	0.705424	1
GO:0000938 GARP complex	4	0.778	1	2	0.91	1	4	2	0.720171	0.999642
GO:0002944 cyclin K-CDK12 complex	2	0.811	1	2	0.031	0.173561	2	2	0.791475	0.999642
GO:0005592 collagen type XI trimer	2	0.349	1	2	0.049	0.217697	2	2	0.933035	0.999642
GO:0005607 laminin-2 complex	2	0.547	1	2	0.146	0.412589	2	2	0.738515	0.999642
GO:0005712 chiasma	2	0.525	1	2	0.45	0.734644	2	2	0.591369	0.999642
GO:0005757 mitochondrial permeability transition pore complex	2	0.973	1	2	0.287	0.574643	2	2	0.916319	0.999642
GO:0005900 oncostatin-M receptor complex	2	0.638	1	2	0.161	0.43436	2	2	0.422924	0.999642
GO:0005940 septin ring	2	0.138	1	2	0.564	0.829057	2	2	0.657576	0.999642
GO:0005960 glycine cleavage complex	2	0.75	1	2	0.773	0.972923	2	2	0.681254	0.999642
GO:0008537 proteasome activator complex	2	0.017	0.549091	2	0.252	0.54291	2	2	0.876553	0.999642
GO:0010370 perinucleolar chromocenter	2	0.795	1	2	0.412	0.707531	2	2	0.660314	0.999642
GO:0016935 glycine-gated chloride channel complex	2	0.11	0.995029	2	0.338	0.629477	2	2	0.541192	0.999642
GO:0019008 molybdopterin synthase complex	2	0.385	1	2	0.206	0.482829	2	2	0.856356	0.999642
GO:0019034 viral replication complex	2	0.88	1	2	0.449	0.734353	2	2	0.79879	0.999642
GO:0019185 snRNA-activating protein complex	2	0.726	1	2	0.875	1	2	2	0.552836	0.999642
GO:0030689 Noc complex	4	0.393	1	2	0.394	0.693592	4	2	0.457026	0.999642
GO:0030906 retromer, cargo-selective complex	3	0.713	1	2	0.68	0.912399	3	2	0.772652	0.999642
GO:0031230 intrinsic component of cell outer membrane	3	0.889	1	2	0.945	1	3	2	0.695991	0.999642
GO:0031372 UBC13-MMS2 complex	2	0.491	1	2	0.804	0.991674	2	2	0.824434	0.999642
GO:0031416 NatB complex	2	0.529	1	2	0.69	0.918249	2	2	0.583872	0.999642
GO:0031838 haptoglobin-hemoglobin complex	5	0.041	0.672935	2	0.165	0.43918	5	2	0.390307	0.999642
GO:0032301 MutSalpha complex	2	0.288	1	2	0.216	0.495856	2	2	0.980046	0.999642
GO:0032398 MHC class Ib protein complex	3	0	0	2	0.144	0.409529	3	2	0.310256	0.999642
GO:0032783 ELL-EAF complex	2	0.843	1	2	0.864	1	2	2	0.894692	0.999642
GO:0034271 phosphatidylinositol 3-kinase complex, class III, type I	3	0.921	1	2	0.635	0.891596	3	2	0.373707	0.999642
GO:0034272 phosphatidylinositol 3-kinase complex, class III, type II	3	0.909	1	2	0.651	0.897805	3	2	0.364193	0.999642
GO:0034669 integrin alpha4-beta7 complex	2	0.512	1	2	0.149	0.417107	2	2	0.622124	0.999642
GO:0035354 Toll-like receptor 1-Toll-like receptor 2 protein complex	2	0.002	0.158947	2	0.354	0.647791	2	2	0.404563	0.999642
GO:0035355 Toll-like receptor 2-Toll-like receptor 6 protein complex	2	0.001	0.125833	2	0.336	0.62706	2	2	0.341509	0.999642
GO:0035577 azurophil granule membrane	2	0.14	1	2	0.324	0.619981	2	2	0.5932	0.999642
GO:0035692 macrophage migration inhibitory factor receptor complex	2	0.031	0.615921	2	0.038	0.191177	2	2	0.422924	0.999642
GO:0036488 CHOP-C/EBP complex	3	0.021	0.556316	2	0.036	0.188	3	2	0.473035	0.999642
GO:0038037 G-protein coupled receptor dimeric complex	3	0.706	1	2	0.129	0.389179	3	2	0.739564	0.999642
GO:0042025 host cell nucleus	2	0.865	1	2	0.452	0.73522	2	2	0.814856	0.999642
GO:0042709 succinate-CoA ligase complex	2	0.167	1	2	0.325	0.619981	2	2	0.892347	0.999642
GO:0044094 host cell nuclear part	2	0.866	1	2	0.47	0.749482	2	2	0.807779	0.999642
GO:0044301 climbing fiber	2	0.505	1	2	0.399	0.693592	2	2	0.607297	0.999642
GO:0044307 dendritic branch	2	0.72	1	2	0.252	0.54291	2	2	0.880529	0.999642
GO:0045203 integral component of cell outer membrane	3	0.88	1	2	0.95	1	3	2	0.687486	0.999642
GO:0045244 succinate-CoA ligase complex (GDP-forming)	2	0.154	1	2	0.325	0.619981	2	2	0.906333	0.999642
GO:0070877 microprocessor complex	2	0.168	1	2	0.255	0.544773	2	2	0.802406	0.999642
GO:0071065 alpha9-beta1 integrin-vascular cell adhesion molecule-1 complex	2	0.013	0.47878	2	0.008	0.0904304	2	2	0.417135	0.999642
GO:0071133 alpha9-beta1 integrin-ADAM8 complex	2	0.174	1	2	0.002	0.034019	2	2	0.981526	0.999642
GO:0072558 NLRP1 inflammasome complex	3	0.004	0.208276	2	0.036	0.188	3	2	0.465273	0.999642
GO:0097226 sperm mitochondrial sheath	2	0.69	1	2	0.012	0.117115	2	2	0.883696	0.999642
GO:0097232 lamellar body membrane	2	0.507	1	2	0.564	0.829057	2	2	0.945074	0.999642
GO:0097233 alveolar lamellar body membrane	2	0.525	1	2	0.583	0.847224	2	2	0.943574	0.999642
GO:0097442 CA3 pyramidal cell dendrite	2	0.721	1	2	0.242	0.532281	2	2	0.670986	0.999642
GO:0097444 spine apparatus	2	0.53	1	2	0.291	0.580051	2	2	0.98818	0.999642
GO:0097457 hippocampal mossy fiber	2	0.985	1	2	0.958	1	2	2	0.893129	0.999642
GO:0097487 multivesicular body, internal vesicle	3	0.721	1	2	0.092	0.315985	3	2	0.57608	0.999642
GO:0097513 myosin II filament	3	0.132	1	2	0.926	1	3	2	0.720171	0.999642
GO:0097541 axonemal basal plate	2	0.49	1	2	0.456	0.737696	2	2	0.623712	0.999642
GO:0097598 sperm cytoplasmic droplet	3	0.999	1	2	0.801	0.990711	3	2	0.629957	0.999642
GO:0097648 G-protein coupled receptor complex	3	0.683	1	2	0.133	0.393927	3	2	0.727844	0.999642
GO:0098833 presynaptic endocytic zone	2	0.441	1	2	0.444	0.732211	2	2	0.669675	0.999642
GO:0098835 presynaptic endocytic zone membrane	2	0.448	1	2	0.469	0.748556	2	2	0.643429	0.999642
GO:0098837 postsynaptic recycling endosome	3	0.729	1	2	0.316	0.612121	3	2	0.800601	0.999642
GO:0098843 postsynaptic endocytic zone	2	0.901	1	2	0.264	0.556675	2	2	0.591369	0.999642
GO:0098890 extrinsic component of postsynaptic membrane	2	0.477	1	2	0.427	0.719455	2	2	0.793315	0.999642
GO:0098982 GABA-ergic synapse	2	0.119	1	2	0.295	0.585411	2	2	0.557287	0.999642
GO:1902560 GMP reductase complex	2	0.114	0.995029	2	0.609	0.871534	2	2	0.856356	0.999642
GO:1902636 kinociliary basal body	2	0.199	1	2	0.503	0.775115	2	2	0.871755	0.999642
GO:1903095 ribonuclease III complex	2	0.159	1	2	0.231	0.515707	2	2	0.8051	0.999642
GO:1990037 Lewy body core	3	0.093	0.93	2	0.018	0.138569	3	2	0.506455	0.999642
GO:1990617 CHOP-ATF4 complex	2	0.011	0.425897	2	0.008	0.0904304	2	2	0.48735	0.999642
GO:1990622 CHOP-ATF3 complex	2	0.02	0.549091	2	0.014	0.126924	2	2	0.373707	0.999642
GO:1990745 EARP complex	4	0.689	1	2	0.907	1	4	2	0.954796	0.999642
GO:1990836 lysosomal matrix	2	0.041	0.672935	2	0.137	0.399155	2	2	0.60386	0.999642
GO:1990879 CST complex	3	0.907	1	2	0.851	1	3	2	0.783105	0.999642
GO:0001226 RNA polymerase II transcription corepressor binding	3	0.992	1	2	0.153	0.484274	3	2	0.834698	0.99996
GO:0001596 angiotensin type I receptor activity	2	0.514	1	2	0.008	0.147365	2	2	0.843952	0.99996
GO:0001639 PLC activating G-protein coupled glutamate receptor activity	2	0.988	1	2	0.305	0.655185	2	2	0.57608	0.99996
GO:0001785 prostaglandin J receptor activity	2	0.852	1	2	0.109	0.430781	2	2	0.618914	0.99996
GO:0001850 complement component C3a binding	2	0.143	0.999936	2	0.032	0.255762	2	2	0.443563	0.99996
GO:0002060 purine nucleobase binding	4	0.075	0.953946	2	0.512	0.801132	4	2	0.41103	0.99996
GO:0003692 left-handed Z-DNA binding	2	0.032	0.761784	2	0.517	0.801939	2	2	0.287858	0.99996
GO:0003839 gamma-glutamylcyclotransferase activity	4	0.345	1	2	0.892	0.993972	4	2	0.914788	0.99996
GO:0003858 3-hydroxybutyrate dehydrogenase activity	2	0.215	1	2	0.786	0.947084	2	2	0.893129	0.99996
GO:0003883 CTP synthase activity	2	0.56	1	2	0.461	0.760128	2	2	0.707738	0.99996
GO:0003920 GMP reductase activity	2	0.106	0.974317	2	0.599	0.856684	2	2	0.850597	0.99996
GO:0003987 acetate-CoA ligase activity	3	0.152	0.999936	2	0.719	0.922831	3	2	0.634533	0.99996
GO:0003998 acylphosphatase activity	2	0.335	1	2	0.604	0.857832	2	2	0.984484	0.99996
GO:0004020 adenylylsulfate kinase activity	2	0.065	0.895057	2	0.4	0.719219	2	2	0.574083	0.99996
GO:0004040 amidase activity	2	0.585	1	2	0.181	0.519633	2	2	0.806888	0.99996
GO:0004053 arginase activity	2	0.751	1	2	0.013	0.169079	2	2	0.982266	0.99996
GO:0004063 aryldialkylphosphatase activity	2	0.936	1	2	0.652	0.891773	2	2	0.634533	0.99996
GO:0004067 asparaginase activity	2	0.058	0.885303	2	0.622	0.870435	2	2	0.448213	0.99996
GO:0004081 bis(5'-nucleosyl)-tetraphosphatase (asymmetrical) activity	2	0.121	0.987172	2	0.726	0.925176	2	2	0.600367	0.99996
GO:0004118 cGMP-stimulated cyclic-nucleotide phosphodiesterase activity	3	0.644	1	2	0.489	0.783715	3	2	0.669675	0.99996
GO:0004314 [acyl-carrier-protein] S-malonyltransferase activity	2	0.703	1	2	0.468	0.764329	2	2	0.581953	0.99996
GO:0004348 glucosylceramidase activity	2	0.771	1	2	0.505	0.796275	2	2	0.694791	0.99996
GO:0004351 glutamate decarboxylase activity	3	0.375	1	2	0.11	0.433535	3	2	0.71906	0.99996
GO:0004392 heme oxygenase (decyclizing) activity	2	0.38	1	2	0.127	0.452728	2	2	0.867734	0.99996
GO:0004464 leukotriene-C4 synthase activity	2	0.697	1	2	0.401	0.719219	2	2	0.653415	0.99996
GO:0004465 lipoprotein lipase activity	2	0.264	1	2	0.176	0.511437	2	2	0.390307	0.99996
GO:0004477 methenyltetrahydrofolate cyclohydrolase activity	4	0.616	1	2	0.495	0.789205	4	2	0.382357	0.99996
GO:0004487 methylenetetrahydrofolate dehydrogenase (NAD+) activity	3	0.55	1	2	0.384	0.708263	3	2	0.382357	0.99996
GO:0004488 methylenetetrahydrofolate dehydrogenase (NADP+) activity	4	0.616	1	2	0.486	0.781533	4	2	0.428433	0.99996
GO:0004572 mannosyl-oligosaccharide 1,3-1,6-alpha-mannosidase activity	2	0.698	1	2	0.357	0.691446	2	2	0.670986	0.99996
GO:0004615 phosphomannomutase activity	2	0.541	1	2	0.429	0.73499	2	2	0.910184	0.99996
GO:0004658 propionyl-CoA carboxylase activity	2	0.329	1	2	0.666	0.895733	2	2	0.752941	0.99996
GO:0004692 cGMP-dependent protein kinase activity	2	0.223	1	2	0.222	0.572611	2	2	0.6405	0.99996
GO:0004705 JUN kinase activity	3	0.907	1	2	0.531	0.809898	3	2	0.705424	0.99996
GO:0004775 succinate-CoA ligase (ADP-forming) activity	2	0.58	1	2	0.315	0.660146	2	2	0.951809	0.99996
GO:0004776 succinate-CoA ligase (GDP-forming) activity	2	0.149	0.999936	2	0.312	0.659174	2	2	0.916319	0.99996
GO:0004777 succinate-semialdehyde dehydrogenase (NAD+) activity	2	0.15	0.999936	2	0.413	0.723213	2	2	0.668358	0.99996
GO:0004779 sulfate adenylyltransferase activity	2	0.057	0.885303	2	0.385	0.709498	2	2	0.57608	0.99996
GO:0004781 sulfate adenylyltransferase (ATP) activity	2	0.067	0.901232	2	0.388	0.712274	2	2	0.585773	0.99996
GO:0004814 arginine-tRNA ligase activity	3	0.368	1	2	0.817	0.959651	3	2	0.631492	0.99996
GO:0004815 aspartate-tRNA ligase activity	2	0.422	1	2	0.974	1	2	2	0.570023	0.99996
GO:0004817 cysteine-tRNA ligase activity	2	0.87	1	2	0.395	0.715333	2	2	0.605586	0.99996
GO:0004822 isoleucine-tRNA ligase activity	2	0.607	1	2	0.932	1	2	2	0.711177	0.99996
GO:0004830 tryptophan-tRNA ligase activity	2	0.407	1	2	0.393	0.71503	2	2	0.824434	0.99996
GO:0004832 valine-tRNA ligase activity	3	0.81	1	2	0.473	0.769275	3	2	0.757961	0.99996
GO:0004910 interleukin-1, Type II, blocking receptor activity	2	0.088	0.953946	2	0.137	0.470027	2	2	0.465273	0.99996
GO:0004911 interleukin-2 receptor activity	2	0.12	0.987172	2	0.146	0.47798	2	2	0.461215	0.99996
GO:0004915 interleukin-6 receptor activity	2	0.648	1	2	0.139	0.470495	2	2	0.52342	0.99996
GO:0004956 prostaglandin D receptor activity	2	0.861	1	2	0.111	0.435876	2	2	0.617291	0.99996
GO:0004958 prostaglandin F receptor activity	2	0.932	1	2	0.109	0.430781	2	2	0.773613	0.99996
GO:0004962 endothelin receptor activity	3	0.244	1	2	0.083	0.39494	3	2	0.823571	0.99996
GO:0004995 tachykinin receptor activity	3	0.989	1	2	0.413	0.723213	3	2	0.974122	0.99996
GO:0005093 Rab GDP-dissociation inhibitor activity	2	0.306	1	2	0.105	0.42435	2	2	0.767814	0.99996
GO:0005094 Rho GDP-dissociation inhibitor activity	3	0.011	0.535279	2	0.01	0.157216	3	2	0.490713	0.99996
GO:0005137 interleukin-5 receptor binding	2	0.679	1	2	0.154	0.484581	2	2	0.956287	0.99996
GO:0005152 interleukin-1 receptor antagonist activity	2	0.731	1	2	0.149	0.48192	2	2	0.452697	0.99996
GO:0005353 fructose transmembrane transporter activity	2	0.377	1	2	0.514	0.801922	2	2	0.809558	0.99996
GO:0005457 GDP-fucose transmembrane transporter activity	2	0.892	1	2	0.717	0.922195	2	2	0.704261	0.99996
GO:0005459 UDP-galactose transmembrane transporter activity	2	0.933	1	2	0.365	0.695639	2	2	0.779333	0.99996
GO:0008120 ceramide glucosyltransferase activity	2	0.121	0.987172	2	0.357	0.691446	2	2	0.390307	0.99996
GO:0008127 quercetin 2,3-dioxygenase activity	2	0.621	1	2	0.145	0.477621	2	2	0.990397	0.99996
GO:0008422 beta-glucosidase activity	4	0.919	1	2	0.74	0.930038	4	2	0.46921	0.99996
GO:0008441 3'(2'),5'-bisphosphate nucleotidase activity	2	0.353	1	2	0.569	0.832929	2	2	0.665704	0.99996
GO:0008481 sphinganine kinase activity	2	0.598	1	2	0.334	0.674284	2	2	0.61401	0.99996
GO:0008489 UDP-galactose:glucosylceramide beta-1,4-galactosyltransferase activity	2	0.117	0.987172	2	0.367	0.696051	2	2	0.41103	0.99996
GO:0008503 benzodiazepine receptor activity	3	0.666	1	2	0.035	0.264007	3	2	0.310256	0.99996
GO:0008532 N-acetyllactosaminide beta-1,3-N-acetylglucosaminyltransferase activity	3	0.766	1	2	0.613	0.864606	3	2	0.917083	0.99996
GO:0008545 JUN kinase kinase activity	2	0.52	1	2	0.409	0.722696	2	2	0.701921	0.99996
GO:0008796 bis(5'-nucleosyl)-tetraphosphatase activity	2	0.127	0.99196	2	0.714	0.921737	2	2	0.5932	0.99996
GO:0009041 uridylate kinase activity	3	0.148	0.999936	2	0.426	0.73341	3	2	0.761932	0.99996
GO:0009374 biotin binding	4	0.967	1	2	0.53	0.80866	4	2	0.773613	0.99996
GO:0015091 ferric iron transmembrane transporter activity	2	0.381	1	2	0.345	0.684261	2	2	0.503437	0.99996
GO:0015228 coenzyme A transmembrane transporter activity	2	0.343	1	2	0.31	0.658022	2	2	0.973381	0.99996
GO:0015247 aminophospholipid transporter activity	2	0.921	1	2	0	0	2	2	0.737462	0.99996
GO:0015292 uniporter activity	2	0.927	1	2	0.489	0.783715	2	2	0.933035	0.99996
GO:0015350 methotrexate transporter activity	2	0.798	1	2	0.317	0.660789	2	2	0.84562	0.99996
GO:0015433 peptide antigen-transporting ATPase activity	2	0.005	0.359674	2	0.322	0.665074	2	2	0	0
GO:0015501 glutamate:sodium symporter activity	2	0.315	1	2	0.309	0.657851	2	2	0.438729	0.99996
GO:0015616 DNA translocase activity	3	0.683	1	2	0.482	0.777431	3	2	0.741654	0.99996
GO:0016165 linoleate 13S-lipoxygenase activity	2	0.971	1	2	0.011	0.162241	2	2	0.795147	0.99996
GO:0016263 glycoprotein-N-acetylgalactosamine 3-beta-galactosyltransferase activity	2	0.384	1	2	0.57	0.83354	2	2	0.855537	0.99996
GO:0016316 phosphatidylinositol-3,4-bisphosphate 4-phosphatase activity	2	0.844	1	2	0.992	1	2	2	0.812214	0.99996
GO:0016418 S-acetyltransferase activity	2	0.207	1	2	0.591	0.849204	2	2	0.628412	0.99996
GO:0016419 S-malonyltransferase activity	2	0.705	1	2	0.445	0.748116	2	2	0.605586	0.99996
GO:0016420 malonyltransferase activity	2	0.695	1	2	0.462	0.760504	2	2	0.596815	0.99996
GO:0016501 prostacyclin receptor activity	2	0.775	1	2	0.253	0.604272	2	2	0.674882	0.99996
GO:0016508 long-chain-enoyl-CoA hydratase activity	3	0.201	1	2	0.692	0.913976	3	2	0.596815	0.99996
GO:0016509 long-chain-3-hydroxyacyl-CoA dehydrogenase activity	3	0.825	1	2	0.688	0.911669	3	2	0.914788	0.99996
GO:0016532 superoxide dismutase copper chaperone activity	2	0.437	1	2	0.022	0.219591	2	2	0.981526	0.99996
GO:0016657 oxidoreductase activity, acting on NAD(P)H, nitrogenous group as acceptor	2	0.112	0.987172	2	0.628	0.874554	2	2	0.855537	0.99996
GO:0016716 oxidoreductase activity, acting on paired donors, with incorporation or reduction of molecular oxygen, another compound as one donor, and incorporation of one atom of oxygen	3	0.844	1	2	0.447	0.750009	3	2	0.520717	0.99996
GO:0016900 oxidoreductase activity, acting on the CH-OH group of donors, disulfide as acceptor	2	0.366	1	2	0.431	0.735528	2	2	0.864502	0.99996
GO:0016909 SAP kinase activity	3	0.91	1	2	0.53	0.80866	3	2	0.698377	0.99996
GO:0017050 D-erythro-sphingosine kinase activity	2	0.583	1	2	0.34	0.680952	2	2	0.596815	0.99996
GO:0019781 NEDD8 activating enzyme activity	2	0.105	0.967813	2	0.567	0.832272	2	2	0.949567	0.99996
GO:0019948 SUMO activating enzyme activity	2	0.38	1	2	0.457	0.7579	2	2	0.820102	0.99996
GO:0019981 interleukin-6 binding	2	0.637	1	2	0.142	0.472819	2	2	0.565874	0.99996
GO:0022852 glycine-gated chloride ion channel activity	2	0.164	1	2	0.926	1	2	2	0.565874	0.99996
GO:0023025 MHC class Ib protein complex binding	2	0.295	1	2	0.464	0.761563	2	2	0.692376	0.99996
GO:0023030 MHC class Ib protein binding, via antigen binding groove	2	0.281	1	2	0.461	0.760128	2	2	0.693586	0.99996
GO:0030226 apolipoprotein receptor activity	2	0.905	1	2	0	0	2	2	0.755961	0.99996
GO:0031691 alpha-1A adrenergic receptor binding	2	0.223	1	2	0.931	1	2	2	0.663022	0.99996
GO:0031692 alpha-1B adrenergic receptor binding	2	0.226	1	2	0.944	1	2	2	0.667034	0.99996
GO:0031726 CCR1 chemokine receptor binding	3	0.93	1	2	0.044	0.298338	3	2	0.404563	0.99996
GO:0031762 follicle-stimulating hormone receptor binding	2	0.228	1	2	0.946	1	2	2	0.669675	0.99996
GO:0031798 type 1 metabotropic glutamate receptor binding	2	0.774	1	2	0.265	0.618477	2	2	0.930768	0.99996
GO:0032143 single thymine insertion binding	2	0.278	1	2	0.236	0.584148	2	2	0.996307	0.99996
GO:0032422 purine-rich negative regulatory element binding	3	0.303	1	2	0.092	0.413038	3	2	0.517966	0.99996
GO:0032556 pyrimidine deoxyribonucleotide binding	2	0.356	1	2	0.636	0.881405	2	2	0.914022	0.99996
GO:0034040 lipid-transporting ATPase activity	3	0.096	0.953946	2	0.483	0.778167	3	2	0.84977	0.99996
GO:0034188 apolipoprotein A-I receptor activity	2	0.939	1	2	0	0	2	2	0.739564	0.99996
GO:0034211 GTP-dependent protein kinase activity	2	0.305	1	2	0.541	0.814727	2	2	0.705424	0.99996
GO:0034416 bisphosphoglycerate phosphatase activity	2	0.453	1	2	0.659	0.892985	2	2	0.886064	0.99996
GO:0035403 histone kinase activity (H3-T6 specific)	2	0.237	1	2	0.229	0.581579	2	2	0.787774	0.99996
GO:0035717 chemokine (C-C motif) ligand 7 binding	2	0.04	0.817037	2	0.053	0.326364	2	2	0.41103	0.99996
GO:0036080 purine nucleotide-sugar transmembrane transporter activity	2	0.901	1	2	0.727	0.9259	2	2	0.724577	0.99996
GO:0036505 prosaposin receptor activity	2	0.131	0.99196	2	0.343	0.68377	2	2	0.433693	0.99996
GO:0038025 reelin receptor activity	2	0.616	1	2	0.168	0.504941	2	2	0.836391	0.99996
GO:0042497 triacyl lipopeptide binding	2	0	0	2	0.355	0.689751	2	2	0.353578	0.99996
GO:0042498 diacyl lipopeptide binding	2	0.002	0.315143	2	0.327	0.670625	2	2	0.382357	0.99996
GO:0043120 tumor necrosis factor binding	3	0.022	0.686774	2	0.105	0.42435	3	2	0.417135	0.99996
GO:0043812 phosphatidylinositol-4-phosphate phosphatase activity	3	0.593	1	2	0.974	1	3	2	0.844786	0.99996
GO:0044729 hemi-methylated DNA-binding	3	0.351	1	2	0.083	0.39494	3	2	0.520717	0.99996
GO:0045155 electron transporter, transferring electrons from CoQH2-cytochrome c reductase complex and cytochrome c oxidase complex activity	2	0.111	0.987172	2	0.058	0.341945	2	2	0.850597	0.99996
GO:0046899 nucleoside triphosphate adenylate kinase activity	2	0.637	1	2	0.012	0.16455	2	2	0.765863	0.99996
GO:0046980 tapasin binding	2	0.004	0.35773	2	0.305	0.655185	2	2	0.25381	0.99996
GO:0046997 oxidoreductase activity, acting on the CH-NH group of donors, flavin as acceptor	2	0.783	1	2	0.836	0.968713	2	2	0.825297	0.99996
GO:0047057 vitamin-K-epoxide reductase (warfarin-sensitive) activity	2	0.394	1	2	0.436	0.739649	2	2	0.878941	0.99996
GO:0047223 beta-1,3-galactosyl-O-glycosyl-glycoprotein beta-1,3-N-acetylglucosaminyltransferase activity	2	0.168	1	2	0.772	0.941849	2	2	0.726758	0.99996
GO:0047708 biotinidase activity	2	0.099	0.954883	2	0.389	0.71289	2	2	0.854716	0.99996
GO:0047710 bis(5'-adenosyl)-triphosphatase activity	2	0.343	1	2	0.454	0.756432	2	2	0.598598	0.99996
GO:0047805 cytidylate cyclase activity	2	0.063	0.894708	2	0.457	0.7579	2	2	0.493999	0.99996
GO:0050051 leukotriene-B4 20-monooxygenase activity	5	0.593	1	2	0.856	0.978517	5	2	0.856356	0.99996
GO:0050062 long-chain-fatty-acyl-CoA reductase activity	2	0.61	1	2	0.724	0.925099	2	2	0.706583	0.99996
GO:0050145 nucleoside phosphate kinase activity	3	0.16	1	2	0.422	0.730332	3	2	0.71906	0.99996
GO:0050262 ribosylnicotinamide kinase activity	2	0.413	1	2	0.768	0.941282	2	2	0.512317	0.99996
GO:0050436 microfibril binding	2	0.546	1	2	0.883	0.990548	2	2	0.61068	0.99996
GO:0050501 hyaluronan synthase activity	4	0.399	1	2	0.176	0.511437	4	2	0.81133	0.99996
GO:0050694 galactose 3-O-sulfotransferase activity	4	0.531	1	2	0.893	0.993972	4	2	0.956287	0.99996
GO:0051424 corticotropin-releasing hormone binding	2	0.538	1	2	0.057	0.339312	2	2	0.779333	0.99996
GO:0051499 D-aminoacyl-tRNA deacylase activity	2	0.541	1	2	0.698	0.915225	2	2	0.5932	0.99996
GO:0051500 D-tyrosyl-tRNA(Tyr) deacylase activity	2	0.529	1	2	0.694	0.913976	2	2	0.57608	0.99996
GO:0051916 granulocyte colony-stimulating factor binding	2	0.483	1	2	0.058	0.341945	2	2	0.636039	0.99996
GO:0052739 phosphatidylserine 1-acylhydrolase activity	2	0.151	0.999936	2	0.942	1	2	2	0.476755	0.99996
GO:0052740 1-acyl-2-lysophosphatidylserine acylhydrolase activity	2	0.142	0.999936	2	0.927	1	2	2	0.476755	0.99996
GO:0052870 tocopherol omega-hydroxylase activity	2	0.366	1	2	0.589	0.848318	2	2	0.772652	0.99996
GO:0052871 alpha-tocopherol omega-hydroxylase activity	2	0.365	1	2	0.569	0.832929	2	2	0.757961	0.99996
GO:0061769 ribosylnicotinate kinase activity	2	0.46	1	2	0.765	0.940258	2	2	0.503437	0.99996
GO:0070996 type 1 melanocortin receptor binding	3	0.409	1	2	0.298	0.650899	3	2	0.884486	0.99996
GO:0071077 adenosine 3',5'-bisphosphate transmembrane transporter activity	2	0.355	1	2	0.299	0.651095	2	2	0.963732	0.99996
GO:0071791 chemokine (C-C motif) ligand 5 binding	2	0.028	0.735333	2	0.048	0.310733	2	2	0.438729	0.99996
GO:0072510 trivalent inorganic cation transmembrane transporter activity	2	0.378	1	2	0.344	0.684261	2	2	0.509414	0.99996
GO:0072542 protein phosphatase activator activity	4	0.861	1	2	0.96	1	4	2	0.920899	0.99996
GO:0080019 fatty-acyl-CoA reductase (alcohol-forming) activity	2	0.591	1	2	0.731	0.926595	2	2	0.705424	0.99996
GO:0080122 AMP transmembrane transporter activity	2	0.38	1	2	0.292	0.645347	2	2	0.968931	0.99996
GO:0086075 gap junction channel activity involved in cardiac conduction electrical coupling	4	0.524	1	2	0.144	0.476521	4	2	0.452697	0.99996
GO:0090556 phosphatidylserine-translocating ATPase activity	2	0.905	1	2	0	0	2	2	0.743732	0.99996
GO:0090729 toxin activity	2	0.319	1	2	0.072	0.377319	2	2	0.637535	0.99996
GO:0097363 protein O-GlcNAc transferase activity	2	0.285	1	2	0.942	1	2	2	0.726758	0.99996
GO:0099530 G-protein coupled receptor activity involved in regulation of postsynaptic membrane potential	2	0.989	1	2	0.299	0.651095	2	2	0.5932	0.99996
GO:1902121 lithocholic acid binding	2	0.69	1	2	0.371	0.697779	2	2	0.589521	0.99996
GO:1903763 gap junction channel activity involved in cell communication by electrical coupling	4	0.55	1	2	0.14	0.471278	4	2	0.476755	0.99996
GO:1990188 euchromatin binding	2	0.813	1	2	0.548	0.820948	2	2	0.846452	0.99996
GO:1990955 G-rich single-stranded DNA binding	2	0.516	1	2	0.309	0.657851	2	2	0.688716	0.99996
GO:0000379 tRNA-type intron splice site recognition and cleavage	3	0.801	1	2	0.709	0.804941	3	3	0.825297	1
GO:0001543 ovarian follicle rupture	3	0.813	1	2	0.453	0.582793	3	3	0.949567	1
GO:0001698 gastrin-induced gastric acid secretion	3	0.254	1	2	0.137	0.278249	3	3	0.737462	1
GO:0001743 optic placode formation	3	0.831	1	2	0.522	0.644952	3	3	0.985963	1
GO:0001810 regulation of type I hypersensitivity	9	0.01	0.242481	2	0.161	0.306608	9	3	0.947321	1
GO:0001887 selenium compound metabolic process	3	0.993	1	2	0.397	0.532587	3	3	0.904788	1
GO:0002069 columnar/cuboidal epithelial cell maturation	4	0.904	1	2	0.155	0.300077	4	3	0.744767	1
GO:0002309 T cell proliferation involved in immune response	4	0.776	1	2	0.315	0.458702	4	3	0.561631	1
GO:0002351 serotonin production involved in inflammatory response	4	0.386	1	2	0.312	0.455832	4	3	0.954049	1
GO:0002408 myeloid dendritic cell chemotaxis	4	0.252	1	2	0.052	0.153373	4	3	0.86854	1
GO:0002442 serotonin secretion involved in inflammatory response	4	0.401	1	2	0.304	0.447706	4	3	0.965219	1
GO:0002949 tRNA threonylcarbamoyladenosine modification	3	0.834	1	2	0.747	0.83258	3	3	0.857175	1
GO:0003213 cardiac right atrium morphogenesis	3	0.838	1	2	0.205	0.354211	3	3	0.672291	1
GO:0003219 cardiac right ventricle formation	4	0.231	0.967398	2	0.167	0.313515	4	3	0.825297	1
GO:0003221 right ventricular cardiac muscle tissue morphogenesis	3	0.997	1	2	0.489	0.615593	3	3	0.736406	1
GO:0003273 cell migration involved in endocardial cushion formation	4	0.97	1	2	0.096	0.225091	4	3	0.959268	1
GO:0003308 negative regulation of Wnt signaling pathway involved in heart development	5	0.542	1	2	0.267	0.413515	5	3	0.936053	1
GO:0006014 D-ribose metabolic process	3	0.884	1	2	0.304	0.447706	3	3	0.93228	1
GO:0006166 purine ribonucleoside salvage	4	0.713	1	2	0.003	0.0354075	4	3	0.978566	1
GO:0006382 adenosine to inosine editing	4	0.211	0.93251	2	0.759	0.840605	4	3	0.622124	1
GO:0006409 tRNA export from nucleus	3	0.852	1	2	0.407	0.541612	3	3	0.843116	1
GO:0006435 threonyl-tRNA aminoacylation	3	0.418	1	2	0.903	0.948008	3	3	0.623712	1
GO:0006543 glutamine catabolic process	3	0.932	1	2	0.815	0.881809	3	3	0.657576	1
GO:0006553 lysine metabolic process	3	0.379	1	2	0.323	0.466697	3	3	0.965219	1
GO:0006659 phosphatidylserine biosynthetic process	4	0.891	1	2	0.375	0.512152	4	3	0.717946	1
GO:0006667 sphinganine metabolic process	3	0.597	1	2	0.471	0.599346	3	3	0.60386	1
GO:0006680 glucosylceramide catabolic process	3	0.854	1	2	0.299	0.443203	3	3	0.734285	1
GO:0006735 NADH regeneration	3	0.264	1	2	0.13	0.269892	3	3	0.668358	1
GO:0006742 NADP catabolic process	4	0.249	0.997728	2	0.295	0.43961	4	3	0.879735	1
GO:0006787 porphyrin-containing compound catabolic process	4	0.612	1	2	0.385	0.521553	4	3	0.949567	1
GO:0006808 regulation of nitrogen utilization	3	0.633	1	2	0.016	0.0819592	3	3	0.925463	1
GO:0006848 pyruvate transport	4	0.157	0.817893	2	0.286	0.430243	4	3	0.503437	1
GO:0006990 positive regulation of transcription from RNA polymerase II promoter involved in unfolded protein response	3	0.918	1	2	0.523	0.645552	3	3	0.775528	1
GO:0007161 calcium-independent cell-matrix adhesion	3	0.8	1	2	0.366	0.504343	3	3	0.839763	1
GO:0007256 activation of JNKK activity	5	1	1	2	0.677	0.780795	5	3	0.528696	1
GO:0007296 vitellogenesis	4	0.438	1	2	0.608	0.721665	4	3	0.548271	1
GO:0007468 regulation of rhodopsin gene expression	3	0.966	1	2	0.253	0.401156	3	3	0.900917	1
GO:0007525 somatic muscle development	4	0.618	1	2	0.933	0.968098	4	3	0.968931	1
GO:0007619 courtship behavior	6	0.716	1	2	0.198	0.347741	6	3	0.826158	1
GO:0008292 acetylcholine biosynthetic process	4	0.922	1	2	0.106	0.238192	4	3	0.960013	1
GO:0008355 olfactory learning	4	0.769	1	2	0.082	0.204389	4	3	0.952556	1
GO:0009138 pyrimidine nucleoside diphosphate metabolic process	4	0.185	0.881699	2	0.515	0.639398	4	3	0.874957	1
GO:0009202 deoxyribonucleoside triphosphate biosynthetic process	5	0.182	0.875612	2	0.516	0.64027	5	3	0.461215	1
GO:0009256 10-formyltetrahydrofolate metabolic process	5	0.761	1	2	1	1	5	3	0.948819	1
GO:0009298 GDP-mannose biosynthetic process	3	0.666	1	2	0.579	0.695687	3	3	0.93228	1
GO:0009449 gamma-aminobutyric acid biosynthetic process	3	0.457	1	2	0.454	0.583831	3	3	0.749896	1
GO:0009957 epidermal cell fate specification	4	0.958	1	2	0.374	0.511157	4	3	0.905561	1
GO:0010248 establishment or maintenance of transmembrane electrochemical gradient	3	0.632	1	2	0.021	0.0936512	3	3	0.646323	1
GO:0010424 DNA methylation on cytosine within a CG sequence	3	0.988	1	2	0.129	0.268408	3	3	0.837236	1
GO:0010513 positive regulation of phosphatidylinositol biosynthetic process	4	0.734	1	2	0.183	0.331447	4	3	0.911721	1
GO:0010535 positive regulation of activation of JAK2 kinase activity	3	0.075	0.591527	2	0.026	0.103972	3	3	0.61401	1
GO:0010693 negative regulation of alkaline phosphatase activity	4	0.717	1	2	0.156	0.30093	4	3	0.452697	1
GO:0010908 regulation of heparan sulfate proteoglycan biosynthetic process	3	0.956	1	2	0.347	0.487256	3	3	0.745798	1
GO:0010909 positive regulation of heparan sulfate proteoglycan biosynthetic process	3	0.962	1	2	0.354	0.493999	3	3	0.777435	1
GO:0010968 regulation of microtubule nucleation	3	1	1	2	0.065	0.176729	3	3	0.750914	1
GO:0012502 induction of programmed cell death	3	0.073	0.583357	2	0.021	0.0936512	3	3	0.945074	1
GO:0014016 neuroblast differentiation	3	0.606	1	2	0.026	0.103972	3	3	0.866927	1
GO:0014053 negative regulation of gamma-aminobutyric acid secretion	4	0.57	1	2	0.754	0.83716	4	3	0.978566	1
GO:0014738 regulation of muscle hyperplasia	3	0.007	0.199422	2	0.011	0.0665836	3	3	0.457026	1
GO:0014858 positive regulation of skeletal muscle cell proliferation	3	0.992	1	2	0.482	0.609174	3	3	0.897031	1
GO:0014900 muscle hyperplasia	3	0.006	0.184145	2	0.009	0.0598675	3	3	0.473035	1
GO:0014916 regulation of lung blood pressure	3	0.262	1	2	0.026	0.103972	3	3	0.538766	1
GO:0015015 heparan sulfate proteoglycan biosynthetic process, enzymatic modification	4	0.474	1	2	0.688	0.789732	4	3	0.591369	1
GO:0015755 fructose transport	3	0.448	1	2	0.643	0.752766	3	3	0.872557	1
GO:0015766 disaccharide transport	3	0.661	1	2	0.702	0.799828	3	3	0.973381	1
GO:0015770 sucrose transport	3	0.658	1	2	0.689	0.790518	3	3	0.960757	1
GO:0015772 oligosaccharide transport	3	0.681	1	2	0.707	0.803397	3	3	0.957778	1
GO:0015781 pyrimidine nucleotide-sugar transport	4	0.996	1	2	0.826	0.890384	4	3	0.771689	1
GO:0016068 type I hypersensitivity	9	0.009	0.228251	2	0.19	0.339471	9	3	0.936053	1
GO:0016095 polyprenol catabolic process	3	0.869	1	2	0.122	0.259839	3	3	0.860441	1
GO:0016103 diterpenoid catabolic process	4	0.959	1	2	0.369	0.506853	4	3	0.353578	1
GO:0016344 meiotic chromosome movement towards spindle pole	3	0.254	1	2	0.651	0.759416	3	3	0.852247	1
GO:0016539 intein-mediated protein splicing	3	0.942	1	2	0.068	0.182156	3	3	0.711177	1
GO:0018125 peptidyl-cysteine methylation	3	0.865	1	2	0.341	0.482203	3	3	0.710035	1
GO:0018199 peptidyl-glutamine modification	3	0.129	0.755682	2	0.435	0.566312	3	3	0.341509	1
GO:0018201 peptidyl-glycine modification	3	0.793	1	2	0.242	0.390875	3	3	0.960757	1
GO:0018312 peptidyl-serine ADP-ribosylation	3	0.914	1	2	0.009	0.0598675	3	3	0.758958	1
GO:0018343 protein farnesylation	4	0.642	1	2	0.408	0.542415	4	3	0.938313	1
GO:0018992 germ-line sex determination	3	0.953	1	2	0.4	0.535371	3	3	0.668358	1
GO:0019064 fusion of virus membrane with host plasma membrane	3	0.051	0.498466	2	0.103	0.234317	3	3	0.716827	1
GO:0019254 carnitine metabolic process, CoA-linked	3	0.349	1	2	0	0	3	3	0.894692	1
GO:0019355 nicotinamide nucleotide biosynthetic process from aspartate	3	0.895	1	2	0.757	0.839254	3	3	0.884486	1
GO:0019371 cyclooxygenase pathway	3	0.079	0.606877	2	0.306	0.449465	3	3	0.397679	1
GO:0021529 spinal cord oligodendrocyte cell differentiation	3	0.309	1	2	0.22	0.369406	3	3	0.89781	1
GO:0021530 spinal cord oligodendrocyte cell fate specification	3	0.319	1	2	0.216	0.365091	3	3	0.914788	1
GO:0021678 third ventricle development	3	0.831	1	2	0.605	0.719067	3	3	0.831297	1
GO:0021773 striatal medium spiny neuron differentiation	3	0.158	0.820412	2	0.178	0.325958	3	3	0.771689	1
GO:0021775 smoothened signaling pathway involved in ventral spinal cord interneuron specification	3	0.71	1	2	0.119	0.255545	3	3	0.713449	1
GO:0021776 smoothened signaling pathway involved in spinal cord motor neuron cell fate specification	3	0.696	1	2	0.112	0.246272	3	3	0.726758	1
GO:0021824 cerebral cortex tangential migration using cell-axon interactions	3	0.338	1	2	0.267	0.413515	3	3	0.931524	1
GO:0021828 gonadotrophin-releasing hormone neuronal migration to the hypothalamus	3	0.327	1	2	0.242	0.390875	3	3	0.910953	1
GO:0021856 hypothalamic tangential migration using cell-axon interactions	3	0.312	1	2	0.239	0.388782	3	3	0.926981	1
GO:0021912 regulation of transcription from RNA polymerase II promoter involved in spinal cord motor neuron fate specification	3	0.936	1	2	0.146	0.289196	3	3	0.857993	1
GO:0030309 poly-N-acetyllactosamine metabolic process	4	0.828	1	2	0.682	0.784878	4	3	0.931524	1
GO:0030311 poly-N-acetyllactosamine biosynthetic process	4	0.856	1	2	0.702	0.799828	4	3	0.918611	1
GO:0030908 protein splicing	3	0.953	1	2	0.079	0.200091	3	3	0.710035	1
GO:0030951 establishment or maintenance of microtubule cytoskeleton polarity	3	0.992	1	2	0.485	0.612041	3	3	0.996307	1
GO:0030961 peptidyl-arginine hydroxylation	3	0.796	1	2	0.788	0.861947	3	3	0.550568	1
GO:0031509 telomeric heterochromatin assembly	3	0.548	1	2	0.15	0.293796	3	3	0.515167	1
GO:0031581 hemidesmosome assembly	4	0.717	1	2	0.862	0.917825	4	3	0.617291	1
GO:0032049 cardiolipin biosynthetic process	5	0.884	1	2	0.765	0.845074	5	3	0.728926	1
GO:0032053 ciliary basal body organization	3	0.095	0.657804	2	0.899	0.944797	3	3	0.98818	1
GO:0032227 negative regulation of synaptic transmission, dopaminergic	5	0.093	0.653572	2	0.165	0.311196	5	3	0.433693	1
GO:0032261 purine nucleotide salvage	4	0.167	0.84069	2	0.798	0.868469	4	3	0.620525	1
GO:0032289 central nervous system myelin formation	3	0.804	1	2	0.072	0.188939	3	3	0.397679	1
GO:0032474 otolith morphogenesis	3	0.603	1	2	0.508	0.633843	3	3	0.800601	1
GO:0032485 regulation of Ral protein signal transduction	3	0.285	1	2	0.624	0.735554	3	3	0.697187	1
GO:0032672 regulation of interleukin-3 production	4	0.025	0.357714	2	0.147	0.290337	4	3	0.873358	1
GO:0032696 negative regulation of interleukin-13 production	3	0.881	1	2	0.201	0.351126	3	3	0.934545	1
GO:0032741 positive regulation of interleukin-18 production	3	0.004	0.14689	2	0.447	0.577244	3	3	0.341509	1
GO:0032763 regulation of mast cell cytokine production	4	0.046	0.471352	2	0.022	0.0959513	4	3	0.422924	1
GO:0032911 negative regulation of transforming growth factor beta1 production	3	0.832	1	2	0.034	0.119832	3	3	0.939818	1
GO:0032929 negative regulation of superoxide anion generation	4	0.998	1	2	0.529	0.650877	4	3	0.68501	1
GO:0033015 tetrapyrrole catabolic process	4	0.635	1	2	0.431	0.563198	4	3	0.93228	1
GO:0033026 negative regulation of mast cell apoptotic process	4	0.86	1	2	0.191	0.340329	4	3	0.561631	1
GO:0033092 positive regulation of immature T cell proliferation in thymus	4	1	1	2	0.024	0.100289	4	3	0.56796	1
GO:0033159 negative regulation of protein import into nucleus, translocation	4	0.93	1	2	0.166	0.312378	4	3	0.725669	1
GO:0033540 fatty acid beta-oxidation using acyl-CoA oxidase	3	0.76	1	2	0.636	0.746602	3	3	0.663022	1
GO:0033563 dorsal/ventral axon guidance	4	0.879	1	2	0.058	0.16487	4	3	0.891564	1
GO:0033566 gamma-tubulin complex localization	3	0.768	1	2	0.938	0.970678	3	3	0.679992	1
GO:0033864 positive regulation of NAD(P)H oxidase activity	3	0.027	0.368488	2	0.065	0.176729	3	3	0.813977	1
GO:0034112 positive regulation of homotypic cell-cell adhesion	5	0.903	1	2	0.012	0.0697491	5	3	0.923183	1
GO:0034395 regulation of transcription from RNA polymerase II promoter in response to iron	3	0.011	0.255982	2	0.178	0.325958	3	3	0.912489	1
GO:0034499 late endosome to Golgi transport	3	0.083	0.620352	2	0.882	0.932135	3	3	0.723481	1
GO:0034627 'de novo' NAD biosynthetic process	3	0.883	1	2	0.743	0.829718	3	3	0.904788	1
GO:0034628 'de novo' NAD biosynthetic process from aspartate	3	0.908	1	2	0.758	0.839929	3	3	0.900917	1
GO:0034635 glutathione transport	3	0.091	0.647032	2	0.204	0.353497	3	3	0.714579	1
GO:0034653 retinoic acid catabolic process	4	0.95	1	2	0.396	0.532004	4	3	0.373707	1
GO:0035106 operant conditioning	4	0.576	1	2	0.265	0.412368	4	3	0.961501	1
GO:0035470 positive regulation of vascular wound healing	4	0.18	0.867962	2	0.115	0.250492	4	3	0.711177	1
GO:0035511 oxidative DNA demethylation	4	0.905	1	2	0.565	0.682897	4	3	0.912489	1
GO:0035513 oxidative RNA demethylation	4	0.904	1	2	0.592	0.708143	4	3	0.744767	1
GO:0035519 protein K29-linked ubiquitination	4	0.996	1	2	0.169	0.315618	4	3	0.533807	1
GO:0035524 proline transmembrane transport	3	0.948	1	2	0.984	0.995769	3	3	0.86854	1
GO:0035553 oxidative single-stranded RNA demethylation	3	0.825	1	2	0.533	0.654409	3	3	0.725669	1
GO:0035564 regulation of kidney size	4	0.959	1	2	0.007	0.0532963	4	3	0.813096	1
GO:0035581 sequestering of extracellular ligand from receptor	7	1	1	2	0.048	0.146273	7	3	0.901693	1
GO:0035723 interleukin-15-mediated signaling pathway	3	0.19	0.89017	2	0.04	0.130814	3	3	0.893129	1
GO:0035790 platelet-derived growth factor receptor-alpha signaling pathway	3	0.65	1	2	0.001	0.0194072	3	3	0.773613	1
GO:0035927 RNA import into mitochondrion	5	0.935	1	2	0.586	0.702249	5	3	0.647758	1
GO:0035928 rRNA import into mitochondrion	3	0.815	1	2	0.475	0.60306	3	3	0.62529	1
GO:0035964 COPI-coated vesicle budding	3	0.278	1	2	0.811	0.878807	3	3	0.917848	1
GO:0035990 tendon cell differentiation	4	0.987	1	2	0.191	0.340329	4	3	0.971898	1
GO:0035992 tendon formation	4	0.985	1	2	0.21	0.35955	4	3	0.983005	1
GO:0036015 response to interleukin-3	4	0.537	1	2	0.256	0.404211	4	3	0.945074	1
GO:0036016 cellular response to interleukin-3	4	0.539	1	2	0.195	0.34436	4	3	0.943574	1
GO:0036112 medium-chain fatty-acyl-CoA metabolic process	3	0.13	0.75735	2	0.333	0.475399	3	3	0.617291	1
GO:0036151 phosphatidylcholine acyl-chain remodeling	3	0.947	1	2	0.775	0.852619	3	3	0.46921	1
GO:0036301 macrophage colony-stimulating factor production	3	0.039	0.438138	2	0.13	0.269892	3	3	0.839763	1
GO:0036506 maintenance of unfolded protein	3	0.974	1	2	0.804	0.873232	3	3	0.980786	1
GO:0038028 insulin receptor signaling pathway via phosphatidylinositol 3-kinase	3	0.71	1	2	0.074	0.192012	3	3	0.960757	1
GO:0038044 transforming growth factor-beta secretion	3	0.199	0.905946	2	0.421	0.554752	3	3	0.820102	1
GO:0039663 membrane fusion involved in viral entry into host cell	3	0.049	0.487926	2	0.116	0.251434	3	3	0.710035	1
GO:0042167 heme catabolic process	4	0.606	1	2	0.426	0.558944	4	3	0.970415	1
GO:0042231 interleukin-13 biosynthetic process	3	0.771	1	2	0.171	0.317894	3	3	0.664366	1
GO:0042628 mating plug formation	3	0.463	1	2	0.554	0.673168	3	3	0.829589	1
GO:0042758 long-chain fatty acid catabolic process	4	0.166	0.839314	2	0.001	0.0194072	4	3	0.57608	1
GO:0042939 tripeptide transport	3	0.105	0.689473	2	0.214	0.363588	3	3	0.695991	1
GO:0042998 positive regulation of Golgi to plasma membrane protein transport	3	0.526	1	2	0.464	0.592742	3	3	0.907104	1
GO:0043366 beta selection	3	0.331	1	2	0.015	0.0789584	3	3	0.815734	1
GO:0043490 malate-aspartate shuttle	3	0.995	1	2	0.326	0.469096	3	3	0.947321	1
GO:0043553 negative regulation of phosphatidylinositol 3-kinase activity	4	0.702	1	2	0.92	0.9599	4	3	0.742695	1
GO:0043974 histone H3-K27 acetylation	3	0.996	1	2	0.194	0.343318	3	3	0.695991	1
GO:0044351 macropinocytosis	7	0.898	1	2	0.607	0.720762	7	3	0.538766	1
GO:0044533 positive regulation of apoptotic process in other organism	3	0.053	0.50671	2	0.019	0.0896709	3	3	0.960757	1
GO:0044704 single-organism reproductive behavior	4	0.543	1	2	0.614	0.726724	4	3	0.848113	1
GO:0044800 multi-organism membrane fusion	3	0.049	0.487926	2	0.11	0.243797	3	3	0.708889	1
GO:0045113 regulation of integrin biosynthetic process	5	0.368	1	2	0.492	0.618646	5	3	0.901693	1
GO:0045196 establishment or maintenance of neuroblast polarity	3	0.548	1	2	0.08	0.201573	3	3	0.930768	1
GO:0045200 establishment of neuroblast polarity	3	0.582	1	2	0.116	0.251434	3	3	0.959268	1
GO:0045297 post-mating behavior	3	0.451	1	2	0.524	0.646257	3	3	0.813096	1
GO:0045360 regulation of interleukin-1 biosynthetic process	3	0.28	1	2	0.081	0.203107	3	3	0.565874	1
GO:0045362 positive regulation of interleukin-1 biosynthetic process	3	0.304	1	2	0.071	0.187195	3	3	0.572064	1
GO:0045583 regulation of cytotoxic T cell differentiation	3	0.631	1	2	0.157	0.302046	3	3	0.760943	1
GO:0045585 positive regulation of cytotoxic T cell differentiation	3	0.602	1	2	0.157	0.302046	3	3	0.762918	1
GO:0045626 negative regulation of T-helper 1 cell differentiation	3	0.284	1	2	0.159	0.304184	3	3	0.87735	1
GO:0045764 positive regulation of cellular amino acid metabolic process	3	0.758	1	2	0.06	0.168049	3	3	0.665704	1
GO:0046061 dATP catabolic process	3	0.019	0.321029	2	0.004	0.0409239	3	3	0.287858	1
GO:0046149 pigment catabolic process	4	0.628	1	2	0.39	0.525866	4	3	0.951062	1
GO:0046292 formaldehyde metabolic process	4	0.467	1	2	0.07	0.185403	4	3	0.851423	1
GO:0046368 GDP-L-fucose metabolic process	3	0.132	0.761322	2	0.457	0.586337	3	3	0.860441	1
GO:0046416 D-amino acid metabolic process	3	0.1	0.672987	2	0.071	0.187195	3	3	0.647758	1
GO:0048320 axial mesoderm formation	3	0.395	1	2	0.017	0.0846347	3	3	0.743732	1
GO:0048807 female genitalia morphogenesis	3	0.728	1	2	0.092	0.21954	3	3	0.834698	1
GO:0048866 stem cell fate specification	3	0.345	1	2	0.135	0.275824	3	3	0.84977	1
GO:0050717 positive regulation of interleukin-1 alpha secretion	3	0.203	0.915951	2	0.027	0.106001	3	3	0.76684	1
GO:0050904 diapedesis	4	0.933	1	2	0.105	0.237041	4	3	0.79606	1
GO:0051031 tRNA transport	5	0.968	1	2	0.56	0.678269	5	3	0.701921	1
GO:0051105 regulation of DNA ligation	3	0.275	1	2	0.393	0.528917	3	3	0.716827	1
GO:0051106 positive regulation of DNA ligation	3	0.315	1	2	0.387	0.523227	3	3	0.748876	1
GO:0051410 detoxification of nitrogen compound	3	0.664	1	2	0.119	0.255545	3	3	0.483907	1
GO:0051466 positive regulation of corticotropin-releasing hormone secretion	3	0.674	1	2	0.434	0.565744	3	3	0.783105	1
GO:0051586 positive regulation of dopamine uptake involved in synaptic transmission	3	0.844	1	2	0.484	0.611035	3	3	0.620525	1
GO:0051697 protein delipidation	4	0.597	1	2	0.949	0.975959	4	3	0.942072	1
GO:0051835 positive regulation of synapse structural plasticity	4	0.144	0.785264	2	0.035	0.121676	4	3	0.906333	1
GO:0051944 positive regulation of catecholamine uptake involved in synaptic transmission	3	0.831	1	2	0.456	0.585652	3	3	0.657576	1
GO:0052042 positive regulation by symbiont of host programmed cell death	3	0.078	0.60431	2	0.025	0.102561	3	3	0.952556	1
GO:0052151 positive regulation by symbiont of host apoptotic process	3	0.066	0.560559	2	0.023	0.0980969	3	3	0.971898	1
GO:0052203 modulation of catalytic activity in other organism involved in symbiotic interaction	3	0.83	1	2	0.354	0.493999	3	3	0.973381	1
GO:0052330 positive regulation by organism of programmed cell death in other organism involved in symbiotic interaction	3	0.072	0.580477	2	0.019	0.0896709	3	3	0.958523	1
GO:0052422 modulation by host of symbiont catalytic activity	3	0.851	1	2	0.34	0.481512	3	3	0.960013	1
GO:0052501 positive regulation by organism of apoptotic process in other organism involved in symbiotic interaction	3	0.077	0.600959	2	0.034	0.119832	3	3	0.953303	1
GO:0055011 atrial cardiac muscle cell differentiation	3	0.775	1	2	0.106	0.238192	3	3	0.871755	1
GO:0055014 atrial cardiac muscle cell development	3	0.76	1	2	0.115	0.250492	3	3	0.881322	1
GO:0055095 lipoprotein particle mediated signaling	3	0.526	1	2	0.036	0.123781	3	3	0.669675	1
GO:0055096 low-density lipoprotein particle mediated signaling	3	0.466	1	2	0.038	0.127371	3	3	0.683764	1
GO:0060066 oviduct development	4	0.895	1	2	0.028	0.108151	4	3	0.757961	1
GO:0060084 synaptic transmission involved in micturition	3	0.454	1	2	0.739	0.827091	3	3	0.520717	1
GO:0060139 positive regulation of apoptotic process by virus	3	0.078	0.60431	2	0.021	0.0936512	3	3	0.942072	1
GO:0060167 regulation of adenosine receptor signaling pathway	3	0.14	0.777243	2	0.005	0.0452252	3	3	0.629957	1
GO:0060332 positive regulation of response to interferon-gamma	4	0.086	0.632725	2	0.167	0.313515	4	3	0.68501	1
GO:0060335 positive regulation of interferon-gamma-mediated signaling pathway	4	0.087	0.635665	2	0.163	0.308777	4	3	0.700744	1
GO:0060374 mast cell differentiation	5	0.786	1	2	0.148	0.291776	5	3	0	0
GO:0060392 negative regulation of SMAD protein import into nucleus	3	0.395	1	2	0.244	0.392758	3	3	0.698377	1
GO:0060398 regulation of growth hormone receptor signaling pathway	4	0.103	0.683761	2	0.192	0.341263	4	3	0.982266	1
GO:0060399 positive regulation of growth hormone receptor signaling pathway	3	0.089	0.64179	2	0.164	0.310009	3	3	0.975604	1
GO:0060408 regulation of acetylcholine metabolic process	3	0.798	1	2	0.001	0.0194072	3	3	0.994091	1
GO:0060448 dichotomous subdivision of terminal units involved in lung branching	3	0.56	1	2	0.031	0.114175	3	3	0.512317	1
GO:0060720 spongiotrophoblast cell proliferation	3	1	1	2	0.457	0.586337	3	3	0.964475	1
GO:0060722 cell proliferation involved in embryonic placenta development	3	1	1	2	0.441	0.572244	3	3	0.975604	1
GO:0060847 endothelial cell fate specification	3	0.943	1	2	0.067	0.180343	3	3	0.981526	1
GO:0060912 cardiac cell fate specification	3	0.797	1	2	0.365	0.50361	3	3	0.821839	1
GO:0061010 gall bladder development	3	0.363	1	2	0.146	0.289196	3	3	0.896252	1
GO:0061034 olfactory bulb mitral cell layer development	3	0.974	1	2	0.264	0.411407	3	3	0.993353	1
GO:0061084 negative regulation of protein refolding	3	0.081	0.614806	2	0.788	0.861947	3	3	0.997046	1
GO:0061152 trachea submucosa development	3	0.903	1	2	0.144	0.286781	3	3	0.978566	1
GO:0061153 trachea gland development	3	0.899	1	2	0.14	0.281909	3	3	1	1
GO:0061181 regulation of chondrocyte development	3	0.197	0.903966	2	0.439	0.570238	3	3	0.996307	1
GO:0061355 Wnt protein secretion	3	0.83	1	2	0.263	0.410529	3	3	0.608995	1
GO:0061356 regulation of Wnt protein secretion	3	0.836	1	2	0.273	0.418717	3	3	0.620525	1
GO:0061621 canonical glycolysis	3	0.255	1	2	0.145	0.287935	3	3	0.657576	1
GO:0061643 chemorepulsion of axon	4	0.958	1	2	0.53	0.651682	4	3	0.960013	1
GO:0061718 glucose catabolic process to pyruvate	3	0.249	0.997728	2	0.114	0.249215	3	3	0.641969	1
GO:0061738 late endosomal microautophagy	3	0.706	1	2	0.131	0.271333	3	3	0.843116	1
GO:0070103 regulation of interleukin-6-mediated signaling pathway	3	0.772	1	2	0.104	0.235596	3	3	0.814856	1
GO:0070425 negative regulation of nucleotide-binding oligomerization domain containing signaling pathway	3	0.012	0.265631	2	0.306	0.449465	3	3	0.707738	1
GO:0070433 negative regulation of nucleotide-binding oligomerization domain containing 2 signaling pathway	3	0.019	0.321029	2	0.311	0.454724	3	3	0.739564	1
GO:0070458 cellular detoxification of nitrogen compound	3	0.669	1	2	0.129	0.268408	3	3	0.476755	1
GO:0070460 thyroid-stimulating hormone secretion	3	0.521	1	2	0.081	0.203107	3	3	0.776483	1
GO:0070488 neutrophil aggregation	3	0.209	0.926895	2	0.117	0.252583	3	3	0.847283	1
GO:0070602 regulation of centromeric sister chromatid cohesion	3	0.946	1	2	0.018	0.087192	3	3	0.784978	1
GO:0070640 vitamin D3 metabolic process	3	0.825	1	2	0.055	0.159135	3	3	0.887639	1
GO:0070676 intralumenal vesicle formation	3	0.989	1	2	0.615	0.727565	3	3	0.634533	1
GO:0070836 caveola assembly	4	0.873	1	2	0.043	0.13688	4	3	0.738515	1
GO:0071211 protein targeting to vacuole involved in autophagy	3	0.038	0.432254	2	0.145	0.287935	3	3	0.62529	1
GO:0071314 cellular response to cocaine	3	0.999	1	2	0.103	0.234317	3	3	0.79879	1
GO:0071336 regulation of hair follicle cell proliferation	3	0.082	0.616504	2	0.027	0.106001	3	3	0.827018	1
GO:0071350 cellular response to interleukin-15	3	0.185	0.881699	2	0.052	0.153373	3	3	0.886064	1
GO:0071421 manganese ion transmembrane transport	3	0.135	0.767477	2	0.286	0.430243	3	3	0.732151	1
GO:0071431 tRNA-containing ribonucleoprotein complex export from nucleus	3	0.855	1	2	0.44	0.571094	3	3	0.841442	1
GO:0071543 diphosphoinositol polyphosphate metabolic process	4	0.957	1	2	0.722	0.81442	4	3	0.860441	1
GO:0071579 regulation of zinc ion transport	3	0.111	0.708727	2	0.271	0.417477	3	3	0.934545	1
GO:0071603 endothelial cell-cell adhesion	3	0.047	0.478511	2	0.055	0.159135	3	3	0.364193	1
GO:0071611 granulocyte colony-stimulating factor production	3	0.042	0.454946	2	0.148	0.291776	3	3	0.865311	1
GO:0071655 regulation of granulocyte colony-stimulating factor production	3	0.037	0.425065	2	0.138	0.279564	3	3	0.864502	1
GO:0071672 negative regulation of smooth muscle cell chemotaxis	3	0.827	1	2	0.011	0.0665836	3	3	0.465273	1
GO:0071673 positive regulation of smooth muscle cell chemotaxis	3	0.626	1	2	0.01	0.0633039	3	3	0.473035	1
GO:0071798 response to prostaglandin D	3	0.929	1	2	0.298	0.442112	3	3	0.896252	1
GO:0071799 cellular response to prostaglandin D stimulus	3	0.946	1	2	0.292	0.436608	3	3	0.886064	1
GO:0071895 odontoblast differentiation	3	0.906	1	2	0.072	0.188939	3	3	0.985963	1
GO:0071963 establishment or maintenance of cell polarity regulating cell shape	3	0.092	0.65014	2	0.137	0.278249	3	3	0.667034	1
GO:0072053 renal inner medulla development	3	0.96	1	2	0.027	0.106001	3	3	0.97264	1
GO:0072093 metanephric renal vesicle formation	4	0.391	1	2	0.966	0.986436	4	3	0.955542	1
GO:0072108 positive regulation of mesenchymal to epithelial transition involved in metanephros morphogenesis	4	0.729	1	2	0.13	0.269892	4	3	0.925463	1
GO:0072131 kidney mesenchyme morphogenesis	4	0.163	0.832092	2	0.019	0.0896709	4	3	0.903242	1
GO:0072133 metanephric mesenchyme morphogenesis	4	0.172	0.852685	2	0.035	0.121676	4	3	0.927739	1
GO:0072197 ureter morphogenesis	4	0.719	1	2	0.024	0.100289	4	3	0.678723	1
GO:0072656 maintenance of protein location in mitochondrion	5	0.688	1	2	0.008	0.0565634	5	3	0.353578	1
GO:0072719 cellular response to cisplatin	4	0.063	0.546029	2	0.171	0.317894	4	3	0.428433	1
GO:0090219 negative regulation of lipid kinase activity	5	0.774	1	2	0.949	0.975959	5	3	0.784978	1
GO:0090244 Wnt signaling pathway involved in somitogenesis	4	0.908	1	2	0.24	0.389357	4	3	0.682512	1
GO:0090283 regulation of protein glycosylation in Golgi	3	0.844	1	2	0.79	0.863069	3	3	0.997784	1
GO:0090309 positive regulation of methylation-dependent chromatin silencing	3	0.975	1	2	0.064	0.175084	3	3	0.886064	1
GO:0090360 platelet-derived growth factor production	3	0.074	0.587653	2	0.32	0.463741	3	3	0.999261	1
GO:0090361 regulation of platelet-derived growth factor production	3	0.081	0.614806	2	0.302	0.44585	3	3	0.962245	1
GO:0090365 regulation of mRNA modification	3	0.003	0.124163	2	0.02	0.0915223	3	3	0.971898	1
GO:0090427 activation of meiosis	4	0.222	0.954562	2	0.032	0.115958	4	3	0.572064	1
GO:0090520 sphingolipid mediated signaling pathway	9	0.799	1	2	0.415	0.54867	9	3	0.715705	1
GO:0090526 regulation of gluconeogenesis involved in cellular glucose homeostasis	3	0.568	1	2	0.744	0.830281	3	3	0.500357	1
GO:0097026 dendritic cell dendrite assembly	4	0.295	1	2	0.45	0.579627	4	3	0.853894	1
GO:0097168 mesenchymal stem cell proliferation	3	0.966	1	2	0.028	0.108151	3	3	0.660314	1
GO:0097296 activation of cysteine-type endopeptidase activity involved in apoptotic signaling pathway	3	0.603	1	2	0.024	0.100289	3	3	0.561631	1
GO:0097476 spinal cord motor neuron migration	4	0.235	0.972926	2	0.071	0.187195	4	3	0.84562	1
GO:0097680 double-strand break repair via classical nonhomologous end joining	3	0.69	1	2	0.606	0.720028	3	3	0.756962	1
GO:0098928 presynaptic signal transduction	3	0.342	1	2	0.027	0.106001	3	3	0.605586	1
GO:0099526 presynapse to nucleus signaling pathway	3	0.314	1	2	0.031	0.114175	3	3	0.626856	1
GO:0099590 neurotransmitter receptor internalization	5	0.985	1	2	0.494	0.620642	5	3	0.615657	1
GO:1900060 negative regulation of ceramide biosynthetic process	3	0.64	1	2	0.751	0.835554	3	3	0.909415	1
GO:1900108 negative regulation of nodal signaling pathway	4	0.958	1	2	0.511	0.636426	4	3	0.957033	1
GO:1900115 extracellular regulation of signal transduction	7	1	1	2	0.061	0.169871	7	3	0.939065	1
GO:1900116 extracellular negative regulation of signal transduction	7	0.999	1	2	0.06	0.168049	7	3	0.904015	1
GO:1900169 regulation of glucocorticoid mediated signaling pathway	3	0.502	1	2	0.505	0.630779	3	3	0.939065	1
GO:1900272 negative regulation of long-term synaptic potentiation	4	0.435	1	2	0.534	0.655316	4	3	0.528696	1
GO:1900425 negative regulation of defense response to bacterium	4	0.886	1	2	0.599	0.714247	4	3	0.892347	1
GO:1900620 acetate ester biosynthetic process	4	0.912	1	2	0.08	0.201573	4	3	0.947321	1
GO:1900623 regulation of monocyte aggregation	3	0.039	0.438138	2	0.051	0.151641	3	3	0.390307	1
GO:1900625 positive regulation of monocyte aggregation	3	0.046	0.471352	2	0.044	0.138483	3	3	0.41103	1
GO:1900739 regulation of protein insertion into mitochondrial membrane involved in apoptotic signaling pathway	3	0.682	1	2	0.658	0.765211	3	3	0.775528	1
GO:1900740 positive regulation of protein insertion into mitochondrial membrane involved in apoptotic signaling pathway	3	0.67	1	2	0.624	0.735554	3	3	0.779333	1
GO:1901003 negative regulation of fermentation	3	0.689	1	2	0.732	0.822067	3	3	0.704261	1
GO:1901187 regulation of ephrin receptor signaling pathway	3	0.948	1	2	0.235	0.385187	3	3	0.907104	1
GO:1901256 regulation of macrophage colony-stimulating factor production	3	0.032	0.397451	2	0.146	0.289196	3	3	0.857993	1
GO:1901301 regulation of cargo loading into COPII-coated vesicle	3	0.857	1	2	0.678	0.781529	3	3	0.977085	1
GO:1901509 regulation of endothelial tube morphogenesis	3	0	0	2	0.381	0.517577	3	3	0.25381	1
GO:1901629 regulation of presynaptic membrane organization	3	0.209	0.926895	2	0.874	0.926867	3	3	0.497212	1
GO:1901668 regulation of superoxide dismutase activity	4	0.321	1	2	0.518	0.642011	4	3	0.855537	1
GO:1901674 regulation of histone H3-K27 acetylation	3	0.995	1	2	0.214	0.363588	3	3	0.687486	1
GO:1901740 negative regulation of myoblast fusion	3	0	0	2	0.188	0.337258	3	3	0	0
GO:1901843 positive regulation of high voltage-gated calcium channel activity	3	0.252	1	2	0.027	0.106001	3	3	0.506455	1
GO:1901906 diadenosine pentaphosphate metabolic process	4	0.955	1	2	0.747	0.83258	4	3	0.874957	1
GO:1901907 diadenosine pentaphosphate catabolic process	4	0.94	1	2	0.74	0.828026	4	3	0.857993	1
GO:1901908 diadenosine hexaphosphate metabolic process	4	0.947	1	2	0.78	0.856118	4	3	0.860441	1
GO:1901909 diadenosine hexaphosphate catabolic process	4	0.954	1	2	0.724	0.815943	4	3	0.865311	1
GO:1901910 adenosine 5'-(hexahydrogen pentaphosphate) metabolic process	4	0.942	1	2	0.756	0.838392	4	3	0.822705	1
GO:1901911 adenosine 5'-(hexahydrogen pentaphosphate) catabolic process	4	0.933	1	2	0.733	0.822515	4	3	0.885275	1
GO:1902004 positive regulation of beta-amyloid formation	6	0.199	0.905946	2	0.313	0.456717	6	3	0.833	1
GO:1902309 negative regulation of peptidyl-serine dephosphorylation	3	0.249	0.997728	2	0.424	0.557145	3	3	0.941321	1
GO:1902564 negative regulation of neutrophil activation	3	0.465	1	2	0.975	0.990455	3	3	0.79879	1
GO:1902688 regulation of NAD metabolic process	3	0.705	1	2	0.475	0.60306	3	3	0.708889	1
GO:1902993 positive regulation of amyloid precursor protein catabolic process	6	0.189	0.887448	2	0.299	0.443203	6	3	0.843116	1
GO:1903054 negative regulation of extracellular matrix organization	4	0.936	1	2	0.079	0.200091	4	3	0.783105	1
GO:1903179 regulation of dopamine biosynthetic process	3	0.721	1	2	0.102	0.233488	3	3	0.848942	1
GO:1903181 positive regulation of dopamine biosynthetic process	3	0.705	1	2	0.103	0.234317	3	3	0.851423	1
GO:1903279 regulation of calcium:sodium antiporter activity	3	0.59	1	2	0.052	0.153373	3	3	0.509414	1
GO:1903375 facioacoustic ganglion development	3	0.318	1	2	0.248	0.3964	3	3	0.925463	1
GO:1903378 positive regulation of oxidative stress-induced neuron intrinsic apoptotic signaling pathway	3	0.418	1	2	0.219	0.368343	3	3	0.981526	1
GO:1903564 regulation of protein localization to cilium	3	0.275	1	2	0.972	0.988942	3	3	0.974863	1
GO:1903593 regulation of histamine secretion by mast cell	3	0.13	0.75735	2	0.403	0.537809	3	3	0.596815	1
GO:1903595 positive regulation of histamine secretion by mast cell	3	0.162	0.828652	2	0.431	0.563198	3	3	0.618914	1
GO:1903719 regulation of I-kappaB phosphorylation	3	0.989	1	2	0.012	0.0697491	3	3	0.738515	1
GO:1903721 positive regulation of I-kappaB phosphorylation	3	0.992	1	2	0.012	0.0697491	3	3	0.717946	1
GO:1903936 cellular response to sodium arsenite	3	0.031	0.391926	2	0.298	0.442112	3	3	0.448213	1
GO:1903943 regulation of hepatocyte apoptotic process	3	0.432	1	2	0.028	0.108151	3	3	0.731079	1
GO:1903944 negative regulation of hepatocyte apoptotic process	3	0.464	1	2	0.056	0.161039	3	3	0.740611	1
GO:1903984 positive regulation of TRAIL-activated apoptotic signaling pathway	3	0.027	0.368488	2	0.014	0.0760606	3	3	0.373707	1
GO:1904023 regulation of glucose catabolic process to lactate via pyruvate	3	0.731	1	2	0.494	0.620642	3	3	0.713449	1
GO:1904048 regulation of spontaneous neurotransmitter secretion	3	0.411	1	2	0.594	0.709859	3	3	0.978566	1
GO:1904057 negative regulation of sensory perception of pain	3	0.361	1	2	0.163	0.308777	3	3	0.615657	1
GO:1904109 positive regulation of cholesterol import	3	0.457	1	2	0.222	0.371109	3	3	0.934545	1
GO:1904124 microglial cell migration	3	0.046	0.471352	2	0.048	0.146273	3	3	0.799696	1
GO:1904139 regulation of microglial cell migration	3	0.041	0.450645	2	0.056	0.161039	3	3	0.825297	1
GO:1904154 positive regulation of retrograde protein transport, ER to cytosol	3	0.945	1	2	0.717	0.810723	3	3	0.872557	1
GO:1904217 regulation of CDP-diacylglycerol-serine O-phosphatidyltransferase activity	3	0.2	0.907247	2	0.841	0.902227	3	3	0.629957	1
GO:1904219 positive regulation of CDP-diacylglycerol-serine O-phosphatidyltransferase activity	3	0.186	0.883813	2	0.854	0.911692	3	3	0.6405	1
GO:1904220 regulation of serine C-palmitoyltransferase activity	4	0.239	0.982444	2	0.903	0.948008	4	3	0.657576	1
GO:1904222 positive regulation of serine C-palmitoyltransferase activity	3	0.223	0.955951	2	0.81	0.878229	3	3	0.639022	1
GO:1904304 regulation of gastro-intestinal system smooth muscle contraction	4	0.867	1	2	0.379	0.515931	4	3	0.730004	1
GO:1904339 negative regulation of dopaminergic neuron differentiation	3	0.988	1	2	0.373	0.510439	3	3	0.707738	1
GO:1904350 regulation of protein catabolic process in the vacuole	3	0.981	1	2	0.093	0.220807	3	3	0.677448	1
GO:1904378 maintenance of unfolded protein involved in ERAD pathway	3	0.964	1	2	0.811	0.878807	3	3	0.968931	1
GO:1904395 positive regulation of skeletal muscle acetylcholine-gated channel clustering	3	0.368	1	2	0.261	0.408933	3	3	0.503437	1
GO:1904580 regulation of intracellular mRNA localization	3	0.017	0.308134	2	0.032	0.115958	3	3	0.628412	1
GO:1904714 regulation of chaperone-mediated autophagy	4	0.078	0.60431	2	0.131	0.271333	4	3	0.971157	1
GO:1904732 regulation of electron carrier activity	3	0.916	1	2	0.524	0.646257	3	3	0.794232	1
GO:1905076 regulation of interleukin-17 secretion	3	0.906	1	2	0.029	0.110371	3	3	0.755961	1
GO:1905077 negative regulation of interleukin-17 secretion	3	0.9	1	2	0.029	0.110371	3	3	0.740611	1
GO:1905150 regulation of voltage-gated sodium channel activity	3	0.361	1	2	0.123	0.261046	3	3	0.713449	1
GO:1905154 negative regulation of membrane invagination	3	0.326	1	2	0.977	0.991751	3	3	0.942823	1
GO:1905457 negative regulation of lymphoid progenitor cell differentiation	3	0.63	1	2	0.142	0.284415	3	3	0.526079	1
GO:1905606 regulation of presynapse assembly	3	0.216	0.941185	2	0.763	0.843484	3	3	0.545943	1
GO:1990166 protein localization to site of double-strand break	3	0.397	1	2	0.989	0.998079	3	3	0.417135	1
GO:2000111 positive regulation of macrophage apoptotic process	3	0.893	1	2	0.055	0.159135	3	3	0.633018	1
GO:2000118 regulation of sodium-dependent phosphate transport	3	0.96	1	2	0.381	0.517577	3	3	0.732151	1
GO:2000182 regulation of progesterone biosynthetic process	3	0.176	0.859437	2	0.107	0.239652	3	3	0.500357	1
GO:2000211 regulation of glutamate metabolic process	3	0.309	1	2	0.01	0.0633039	3	3	0.838079	1
GO:2000286 receptor internalization involved in canonical Wnt signaling pathway	3	0.784	1	2	0.824	0.888865	3	3	0.973381	1
GO:2000409 positive regulation of T cell extravasation	3	0.478	1	2	0.049	0.148121	3	3	0.626856	1
GO:2000467 positive regulation of glycogen (starch) synthase activity	5	0.616	1	2	0.008	0.0565634	5	3	0.917083	1
GO:2000468 regulation of peroxidase activity	3	0.251	1	2	0.141	0.28309	3	3	0.545943	1
GO:2000611 positive regulation of thyroid hormone generation	3	0.664	1	2	0.097	0.226519	3	3	0.791475	1
GO:2000645 negative regulation of receptor catabolic process	3	0.052	0.503591	2	0.029	0.110371	3	3	0.433693	1
GO:2000646 positive regulation of receptor catabolic process	3	0.892	1	2	0.057	0.163043	3	3	0.580015	1
GO:2000729 positive regulation of mesenchymal cell proliferation involved in ureter development	3	0.996	1	2	0.382	0.518561	3	3	0.772652	1
GO:2000825 positive regulation of androgen receptor activity	3	0.564	1	2	0.696	0.795338	3	3	0.882114	1
GO:2000832 negative regulation of steroid hormone secretion	3	0.994	1	2	0.059	0.166175	3	3	0.973381	1
GO:2000847 negative regulation of corticosteroid hormone secretion	3	0.991	1	2	0.051	0.151641	3	3	0.967447	1
GO:2000850 negative regulation of glucocorticoid secretion	3	0.994	1	2	0.058	0.16487	3	3	0.964475	1
GO:2000911 positive regulation of sterol import	3	0.44	1	2	0.216	0.365091	3	3	0.957778	1
GO:2000974 negative regulation of pro-B cell differentiation	3	0.619	1	2	0.143	0.285772	3	3	0.520717	1
GO:2000978 negative regulation of forebrain neuron differentiation	3	0.588	1	2	0.136	0.277003	3	3	0.636039	1
GO:2000983 regulation of ATP citrate synthase activity	3	0.677	1	2	0.508	0.633843	3	3	0.81133	1
GO:2000984 negative regulation of ATP citrate synthase activity	3	0.633	1	2	0.534	0.655316	3	3	0.808669	1
GO:2001160 regulation of histone H3-K79 methylation	3	0.943	1	2	0.448	0.57799	3	3	0.907104	1
GO:2001201 regulation of transforming growth factor-beta secretion	3	0.192	0.893282	2	0.432	0.563967	3	3	0.813977	1
GO:2001274 negative regulation of glucose import in response to insulin stimulus	3	0.97	1	2	0.866	0.920782	3	3	0.808669	1
GO:0000221 vacuolar proton-transporting V-type ATPase, V1 domain	3	0.903	1	2	0.735	0.955302	3	3	0.962245	0.999642
GO:0000799 nuclear condensin complex	3	0.466	1	2	0.847	1	3	3	0.803305	0.999642
GO:0000811 GINS complex	3	0.837	1	2	0.88	1	3	3	0.929254	0.999642
GO:0000931 gamma-tubulin large complex	4	0.843	1	2	0.653	0.897805	4	3	0.557287	0.999642
GO:0005594 collagen type IX trimer	3	0.645	1	2	0.05	0.218337	3	3	0.938313	0.999642
GO:0005606 laminin-1 complex	3	0.611	1	2	0.265	0.557082	3	3	0.778385	0.999642
GO:0005610 laminin-5 complex	4	0.685	1	2	0.22	0.501173	4	3	0.987441	0.999642
GO:0005726 perichromatin fibrils	4	0.15	1	2	0.057	0.235653	4	3	0.767814	0.999642
GO:0005955 calcineurin complex	4	0.776	1	2	0.191	0.46858	4	3	0.61068	0.999642
GO:0005967 mitochondrial pyruvate dehydrogenase complex	3	0.54	1	2	0.871	1	3	3	0.817486	0.999642
GO:0008274 gamma-tubulin ring complex	4	0.845	1	2	0.651	0.897805	4	3	0.503437	0.999642
GO:0014701 junctional sarcoplasmic reticulum membrane	3	0.123	1	2	0.67	0.905159	3	3	0.886064	0.999642
GO:0016035 zeta DNA polymerase complex	3	0.812	1	2	0.452	0.73522	3	3	0.681254	0.999642
GO:0017133 mitochondrial electron transfer flavoprotein complex	3	0.155	1	2	0.776	0.975324	3	3	0.850597	0.999642
GO:0019815 B cell receptor complex	7	0.568	1	2	0.27	0.560721	7	3	0.739564	0.999642
GO:0031088 platelet dense granule membrane	3	0.398	1	2	0.374	0.669303	3	3	0.585773	0.999642
GO:0031092 platelet alpha granule membrane	3	0.242	1	2	0.37	0.66706	3	3	0.936807	0.999642
GO:0031166 integral component of vacuolar membrane	3	0.358	1	2	0.178	0.451574	3	3	0.587655	0.999642
GO:0031262 Ndc80 complex	4	0.995	1	2	0.845	1	4	3	0.948819	0.999642
GO:0031310 intrinsic component of vacuolar membrane	3	0.375	1	2	0.182	0.455255	3	3	0.612351	0.999642
GO:0031467 Cul7-RING ubiquitin ligase complex	3	0.809	1	2	0.407	0.701643	3	3	0.918611	0.999642
GO:0031510 SUMO activating enzyme complex	3	0.491	1	2	0.457	0.738644	3	3	0.950314	0.999642
GO:0032807 DNA ligase IV complex	3	0.855	1	2	0.952	1	3	3	0.720171	0.999642
GO:0032937 SREBP-SCAP-Insig complex	3	0.641	1	2	0.447	0.73339	3	3	0.725669	0.999642
GO:0034750 Scrib-APC-beta-catenin complex	3	0.321	1	2	0.083	0.300077	3	3	0.721278	0.999642
GO:0035101 FACT complex	3	0.632	1	2	0.923	1	3	3	0.515167	0.999642
GO:0035985 senescence-associated heterochromatin focus	4	0.994	1	2	0.034	0.184012	4	3	0.983005	0.999642
GO:0036194 muscle cell projection	3	0.99	1	2	0.675	0.909163	3	3	0.870149	0.999642
GO:0036195 muscle cell projection membrane	3	0.989	1	2	0.663	0.901842	3	3	0.84228	0.999642
GO:0042406 extrinsic component of endoplasmic reticulum membrane	6	0.136	1	2	0.481	0.754228	6	3	0.490713	0.999642
GO:0044308 axonal spine	4	0.183	1	2	0.909	1	4	3	0.98818	0.999642
GO:0045251 electron transfer flavoprotein complex	3	0.148	1	2	0.751	0.96426	3	3	0.896252	0.999642
GO:0045273 respiratory chain complex II	4	0.303	1	2	0.798	0.989055	4	3	0.89781	0.999642
GO:0045281 succinate dehydrogenase complex	4	0.304	1	2	0.817	0.992088	4	3	0.923943	0.999642
GO:0048179 activin receptor complex	3	0.797	1	2	0.458	0.738923	3	3	0.646323	0.999642
GO:0061825 podosome core	3	0.575	1	2	0.762	0.969325	3	3	0.93228	0.999642
GO:0070033 synaptobrevin 2-SNAP-25-syntaxin-1a-complexin II complex	4	0.491	1	2	0.062	0.252237	4	3	0.497212	0.999642
GO:0070110 ciliary neurotrophic factor receptor complex	3	0.769	1	2	0.063	0.253419	3	3	0.557287	0.999642
GO:0071821 FANCM-MHF complex	3	0.743	1	2	0.4	0.693592	3	3	0.60386	0.999642
GO:0090661 box H/ACA telomerase RNP complex	3	0.491	1	2	0.627	0.886637	3	3	0.893911	0.999642
GO:0090725 peripheral region of growth cone	3	0.898	1	2	0.391	0.692495	3	3	0.694791	0.999642
GO:0097025 MPP7-DLG1-LIN7 complex	3	0.998	1	2	0.065	0.257406	3	3	0.802406	0.999642
GO:0097058 CRLF-CLCF1 complex	3	0.987	1	2	0.053	0.225376	3	3	0.926981	0.999642
GO:0097427 microtubule bundle	3	0.23	1	2	0.201	0.479287	3	3	0.813977	0.999642
GO:0097450 astrocyte end-foot	4	0.188	1	2	0.093	0.317587	4	3	0.512317	0.999642
GO:0097543 ciliary inversin compartment	3	0.948	1	2	0.45	0.734644	3	3	0.850597	0.999642
GO:0098831 presynaptic active zone cytoplasmic component	4	0.407	1	2	0.133	0.393927	4	3	0.607297	0.999642
GO:0099522 region of cytosol	3	0.713	1	2	0.036	0.188	3	3	0.480377	0.999642
GO:0099524 postsynaptic cytosol	3	0.706	1	2	0.035	0.187156	3	3	0.457026	0.999642
GO:1990423 RZZ complex	3	0.847	1	2	0.528	0.799159	3	3	0.397679	0.999642
GO:1990597 AIP1-IRE1 complex	3	0.994	1	2	0.447	0.73339	3	3	0.760943	0.999642
GO:1990761 growth cone lamellipodium	3	0.539	1	2	0.398	0.693592	3	3	0.52342	0.999642
GO:1990812 growth cone filopodium	3	0.995	1	2	0.011	0.112263	3	3	0.821839	0.999642
GO:1990907 beta-catenin-TCF complex	3	0.916	1	2	0.041	0.197375	3	3	0.997784	0.999642
GO:0000026 alpha-1,2-mannosyltransferase activity	3	0.98	1	2	0.983	1	3	3	0.891564	0.99996
GO:0000104 succinate dehydrogenase activity	4	0.346	1	2	0.807	0.956144	4	3	0.898587	0.99996
GO:0000298 endopolyphosphatase activity	4	0.958	1	2	0.718	0.922831	4	3	0.881322	0.99996
GO:0000309 nicotinamide-nucleotide adenylyltransferase activity	3	0.89	1	2	0.736	0.928819	3	3	0.896252	0.99996
GO:0000403 Y-form DNA binding	4	0.762	1	2	0.025	0.228785	4	3	0.874158	0.99996
GO:0001224 RNA polymerase II transcription cofactor binding	4	0.997	1	2	0.149	0.48192	4	3	0.83385	0.99996
GO:0003886 DNA (cytosine-5-)-methyltransferase activity	3	0.604	1	2	0.075	0.380496	3	3	0.404563	0.99996
GO:0003918 DNA topoisomerase type II (ATP-hydrolyzing) activity	4	0.755	1	2	0.556	0.824871	4	3	0.6405	0.99996
GO:0004052 arachidonate 12-lipoxygenase activity	4	0.999	1	2	0.011	0.162241	4	3	0.438729	0.99996
GO:0004096 catalase activity	3	0.801	1	2	0.152	0.483964	3	3	0.56796	0.99996
GO:0004117 calmodulin-dependent cyclic-nucleotide phosphodiesterase activity	3	0.849	1	2	0.275	0.626154	3	3	0.660314	0.99996
GO:0004126 cytidine deaminase activity	5	0.932	1	2	0.008	0.147365	5	3	0.731079	0.99996
GO:0004174 electron-transferring-flavoprotein dehydrogenase activity	3	0.138	0.999936	2	0.542	0.815375	3	3	0.857175	0.99996
GO:0004301 epoxide hydrolase activity	4	0.067	0.901232	2	0.113	0.438117	4	3	0.891564	0.99996
GO:0004430 1-phosphatidylinositol 4-kinase activity	4	0.976	1	2	0.877	0.987171	4	3	0.920137	0.99996
GO:0004457 lactate dehydrogenase activity	6	0.884	1	2	0.27	0.620696	6	3	0.64488	0.99996
GO:0004470 malic enzyme activity	3	0.117	0.987172	2	0.693	0.913976	3	3	0.620525	0.99996
GO:0004471 malate dehydrogenase (decarboxylating) (NAD+) activity	3	0.134	0.99196	2	0.716	0.921737	3	3	0.665704	0.99996
GO:0004473 malate dehydrogenase (decarboxylating) (NADP+) activity	3	0.125	0.987172	2	0.719	0.922831	3	3	0.628412	0.99996
GO:0004514 nicotinate-nucleotide diphosphorylase (carboxylating) activity	3	0.85	1	2	0.717	0.922195	3	3	0.921661	0.99996
GO:0004515 nicotinate-nucleotide adenylyltransferase activity	3	0.885	1	2	0.74	0.930038	3	3	0.896252	0.99996
GO:0004517 nitric-oxide synthase activity	3	0.55	1	2	0.252	0.604237	3	3	0.631492	0.99996
GO:0004528 phosphodiesterase I activity	4	0.544	1	2	0.306	0.655692	4	3	0.41103	0.99996
GO:0004605 phosphatidate cytidylyltransferase activity	3	0.824	1	2	0.857	0.978517	3	3	0.691162	0.99996
GO:0004699 calcium-independent protein kinase C activity	3	0.889	1	2	0.302	0.653648	3	3	0.687486	0.99996
GO:0004735 pyrroline-5-carboxylate reductase activity	4	0.44	1	2	0.915	1	4	3	0.807779	0.99996
GO:0004739 pyruvate dehydrogenase (acetyl-transferring) activity	3	0.239	1	2	0.272	0.622626	3	3	0.5932	0.99996
GO:0004748 ribonucleoside-diphosphate reductase activity, thioredoxin disulfide as acceptor	3	0.251	1	2	0.6	0.856972	3	3	0.998523	0.99996
GO:0004809 tRNA (guanine-N2-)-methyltransferase activity	3	0.954	1	2	0.929	1	3	3	0.975604	0.99996
GO:0004829 threonine-tRNA ligase activity	3	0.4	1	2	0.913	1	3	3	0.62529	0.99996
GO:0004924 oncostatin-M receptor activity	3	0.77	1	2	0.169	0.506343	3	3	0.99483	0.99996
GO:0005001 transmembrane receptor protein tyrosine phosphatase activity	4	0.08	0.953946	2	0.165	0.500481	4	3	0.433693	0.99996
GO:0005119 smoothened binding	3	0.227	1	2	0.298	0.650899	3	3	0.792396	0.99996
GO:0005220 inositol 1,4,5-trisphosphate-sensitive calcium-release channel activity	3	0.831	1	2	0.184	0.52404	3	3	0.828733	0.99996
GO:0005250 A-type (transient outward) potassium channel activity	4	0.346	1	2	0.201	0.546353	4	3	0.618914	0.99996
GO:0005280 hydrogen:amino acid symporter activity	4	0.275	1	2	0.885	0.991496	4	3	0.826158	0.99996
GO:0005290 L-histidine transmembrane transporter activity	3	0.416	1	2	0.956	1	3	3	0.563765	0.99996
GO:0005483 soluble NSF attachment protein activity	3	0.537	1	2	0.715	0.921737	3	3	0.79879	0.99996
GO:0008486 diphosphoinositol-polyphosphate diphosphatase activity	4	0.945	1	2	0.747	0.933641	4	3	0.857175	0.99996
GO:0008506 sucrose:proton symporter activity	3	0.696	1	2	0.7	0.915976	3	3	0.977085	0.99996
GO:0008515 sucrose transmembrane transporter activity	3	0.688	1	2	0.717	0.922195	3	3	0.965961	0.99996
GO:0008597 calcium-dependent protein serine/threonine phosphatase regulator activity	3	0.794	1	2	0.607	0.859817	3	3	0.585773	0.99996
GO:0008823 cupric reductase activity	3	0.875	1	2	0.829	0.965554	3	3	0.476755	0.99996
GO:0015065 uridine nucleotide receptor activity	3	0.059	0.885303	2	0.358	0.692133	3	3	0.994091	0.99996
GO:0015087 cobalt ion transmembrane transporter activity	3	0.474	1	2	0.811	0.95811	3	3	0.674882	0.99996
GO:0015111 iodide transmembrane transporter activity	3	0.096	0.953946	2	0.715	0.921737	3	3	0.952556	0.99996
GO:0015119 hexose phosphate transmembrane transporter activity	3	0.967	1	2	0.27	0.620696	3	3	0.995569	0.99996
GO:0015154 disaccharide transmembrane transporter activity	3	0.662	1	2	0.722	0.924194	3	3	0.955542	0.99996
GO:0015157 oligosaccharide transmembrane transporter activity	3	0.683	1	2	0.698	0.915225	3	3	0.957778	0.99996
GO:0015252 hydrogen ion channel activity	4	0.052	0.8824	2	0.781	0.945572	4	3	0.668358	0.99996
GO:0015315 organophosphate:inorganic phosphate antiporter activity	3	0.97	1	2	0.249	0.600398	3	3	0.999261	0.99996
GO:0015349 thyroid hormone transmembrane transporter activity	5	0.869	1	2	0.882	0.990202	5	3	0.734285	0.99996
GO:0015526 hexose-phosphate:inorganic phosphate antiporter activity	3	0.961	1	2	0.248	0.599333	3	3	0.996307	0.99996
GO:0016262 protein N-acetylglucosaminyltransferase activity	3	0.527	1	2	0.98	1	3	3	0.917083	0.99996
GO:0016309 1-phosphatidylinositol-5-phosphate 4-kinase activity	3	0.978	1	2	0.739	0.92987	3	3	0.622124	0.99996
GO:0016649 oxidoreductase activity, acting on the CH-NH group of donors, quinone or similar compound as acceptor	3	0.147	0.999936	2	0.528	0.80733	3	3	0.847283	0.99996
GO:0016728 oxidoreductase activity, acting on CH or CH2 groups, disulfide as acceptor	3	0.234	1	2	0.585	0.844825	3	3	0.987441	0.99996
GO:0016822 hydrolase activity, acting on acid carbon-carbon bonds	3	0.11	0.987172	2	0.246	0.596515	3	3	0.784978	0.99996
GO:0016823 hydrolase activity, acting on acid carbon-carbon bonds, in ketonic substances	3	0.12	0.987172	2	0.267	0.620696	3	3	0.783105	0.99996
GO:0016833 oxo-acid-lyase activity	4	0.781	1	2	0.889	0.993902	4	3	0.817486	0.99996
GO:0017089 glycolipid transporter activity	4	0.898	1	2	0.746	0.932935	4	3	0.835545	0.99996
GO:0017095 heparan sulfate 6-O-sulfotransferase activity	3	0.394	1	2	0.594	0.852088	3	3	0.591369	0.99996
GO:0017098 sulfonylurea receptor binding	3	0.809	1	2	0.146	0.47798	3	3	0.552836	0.99996
GO:0019198 transmembrane receptor protein phosphatase activity	4	0.089	0.953946	2	0.139	0.470495	4	3	0.443563	0.99996
GO:0019211 phosphatase activator activity	6	0.95	1	2	0.993	1	6	3	0.844786	0.99996
GO:0030060 L-malate dehydrogenase activity	3	0.285	1	2	0.211	0.560057	3	3	0.919374	0.99996
GO:0030297 transmembrane receptor protein tyrosine kinase activator activity	4	0.864	1	2	0.131	0.459356	4	3	0.953303	0.99996
GO:0030350 iron-responsive element binding	3	0.433	1	2	0.001	0.0408762	3	3	0.629957	0.99996
GO:0030942 endoplasmic reticulum signal peptide binding	4	0.912	1	2	0.498	0.79105	4	3	0.894692	0.99996
GO:0031708 endothelin B receptor binding	3	0.084	0.953946	2	0.08	0.39286	3	3	0.483907	0.99996
GO:0031779 melanocortin receptor binding	4	0.473	1	2	0.36	0.69232	4	3	0.857993	0.99996
GO:0031781 type 3 melanocortin receptor binding	4	0.484	1	2	0.353	0.688984	4	3	0.814856	0.99996
GO:0031782 type 4 melanocortin receptor binding	4	0.492	1	2	0.363	0.694294	4	3	0.83385	0.99996
GO:0031849 olfactory receptor binding	5	0.002	0.315143	2	0.735	0.927829	5	3	0.925463	0.99996
GO:0031871 proteinase activated receptor binding	3	0.277	1	2	0.036	0.269185	3	3	0.908645	0.99996
GO:0032142 single guanine insertion binding	3	0.333	1	2	0.221	0.572439	3	3	0.686251	0.99996
GO:0032767 copper-dependent protein binding	3	0.39	1	2	0.02	0.209366	3	3	0.870149	0.99996
GO:0033192 calmodulin-dependent protein phosphatase activity	4	0.765	1	2	0.347	0.684747	4	3	0.962245	0.99996
GO:0034431 bis(5'-adenosyl)-hexaphosphatase activity	4	0.944	1	2	0.758	0.936481	4	3	0.871755	0.99996
GO:0034432 bis(5'-adenosyl)-pentaphosphatase activity	4	0.953	1	2	0.738	0.92943	4	3	0.869345	0.99996
GO:0034988 Fc-gamma receptor I complex binding	3	0.02	0.668485	2	0.153	0.484274	3	3	0.457026	0.99996
GO:0035243 protein-arginine omega-N symmetric methyltransferase activity	3	0.465	1	2	0.553	0.823327	3	3	0.953303	0.99996
GO:0035514 DNA demethylase activity	3	0.831	1	2	0.502	0.794463	3	3	0.974863	0.99996
GO:0035515 oxidative RNA demethylase activity	4	0.907	1	2	0.603	0.857832	4	3	0.748876	0.99996
GO:0035614 snRNA stem-loop binding	3	0.865	1	2	0.333	0.674284	3	3	0.762918	0.99996
GO:0035615 clathrin adaptor activity	5	0.101	0.954883	2	0.132	0.460231	5	3	0.740611	0.99996
GO:0035620 ceramide transporter activity	3	0.999	1	2	0.276	0.626768	3	3	0.853894	0.99996
GO:0035650 AP-1 adaptor complex binding	3	0.033	0.774447	2	0.825	0.964035	3	3	0.742695	0.99996
GO:0035663 Toll-like receptor 2 binding	3	0.055	0.885303	2	0.43	0.73499	3	3	0.589521	0.99996
GO:0035877 death effector domain binding	3	0.491	1	2	0.039	0.279446	3	3	0.617291	0.99996
GO:0036132 13-prostaglandin reductase activity	3	0.821	1	2	0.766	0.940948	3	3	0.974122	0.99996
GO:0042834 peptidoglycan binding	8	0.786	1	2	0.305	0.655185	8	3	0.382357	0.99996
GO:0042895 antibiotic transporter activity	3	0.752	1	2	0.391	0.714724	3	3	0.60386	0.99996
GO:0043398 HLH domain binding	3	0.779	1	2	0.278	0.628318	3	3	0.917848	0.99996
GO:0043423 3-phosphoinositide-dependent protein kinase binding	3	0.525	1	2	0.16	0.490865	3	3	0.985963	0.99996
GO:0043734 DNA-N1-methyladenine dioxygenase activity	4	0.903	1	2	0.576	0.838315	4	3	0.914022	0.99996
GO:0044323 retinoic acid-responsive element binding	5	0.504	1	2	0.343	0.68377	5	3	0.561631	0.99996
GO:0046573 lactonohydrolase activity	3	0.993	1	2	0.938	1	3	3	0.870953	0.99996
GO:0046848 hydroxyapatite binding	4	0.221	1	2	0.012	0.16455	4	3	0.797882	0.99996
GO:0047522 15-oxoprostaglandin 13-oxidase activity	3	0.798	1	2	0.776	0.943243	3	3	0.978566	0.99996
GO:0047696 beta-adrenergic receptor kinase activity	4	0.994	1	2	0.14	0.471278	4	3	0.929254	0.99996
GO:0048101 calcium- and calmodulin-regulated 3',5'-cyclic-GMP phosphodiesterase activity	3	0.839	1	2	0.282	0.633356	3	3	0.639022	0.99996
GO:0048408 epidermal growth factor binding	3	0.162	1	2	0.091	0.412867	3	3	0.572064	0.99996
GO:0052851 ferric-chelate reductase (NADPH) activity	3	0.881	1	2	0.837	0.969087	3	3	0.503437	0.99996
GO:0061505 DNA topoisomerase II activity	4	0.734	1	2	0.52	0.803109	4	3	0.658949	0.99996
GO:0061513 glucose 6-phosphate:inorganic phosphate antiporter activity	3	0.972	1	2	0.247	0.597927	3	3	0.991136	0.99996
GO:0061628 H3K27me3 modified histone binding	3	0.793	1	2	0.944	1	3	3	0.851423	0.99996
GO:0061731 ribonucleoside-diphosphate reductase activity	3	0.251	1	2	0.565	0.831612	3	3	0.98818	0.99996
GO:0070538 oleic acid binding	3	0.112	0.987172	2	0.028	0.24278	3	3	0.637535	0.99996
GO:0070546 L-phenylalanine aminotransferase activity	4	0.999	1	2	0.407	0.722135	4	3	0.936053	0.99996
GO:0070548 L-glutamine aminotransferase activity	3	1	1	2	0.114	0.439217	3	3	0.757961	0.99996
GO:0071553 G-protein coupled pyrimidinergic nucleotide receptor activity	3	0.058	0.885303	2	0.36	0.69232	3	3	0.979306	0.99996
GO:0086089 voltage-gated potassium channel activity involved in atrial cardiac muscle cell action potential repolarization	3	0.773	1	2	0.194	0.535465	3	3	0.779333	0.99996
GO:0097016 L27 domain binding	3	0.759	1	2	0.09	0.410936	3	3	0.983005	0.99996
GO:0098748 endocytic adaptor activity	5	0.125	0.987172	2	0.118	0.442973	5	3	0.711177	0.99996
GO:0102007 acyl-L-homoserine-lactone lactonohydrolase activity	3	0.99	1	2	0.952	1	3	3	0.881322	0.99996
GO:1904121 phosphatidylethanolamine transporter activity	3	0.809	1	2	0	0	3	3	0.660314	0.99996
GO:1990829 C-rich single-stranded DNA binding	3	0.95	1	2	0.157	0.488293	3	3	0.559472	0.99996
GO:2001070 starch binding	3	0.681	1	2	0.096	0.417036	3	3	0.987441	0.99996
GO:0000189 MAPK import into nucleus	3	0.582	1	3	0.528	0.650072	3	3	0.769756	1
GO:0002019 regulation of renal output by angiotensin	3	0.031	0.391926	3	0.004	0.0409239	3	3	0.483907	1
GO:0002317 plasma cell differentiation	5	0.024	0.352536	3	0.227	0.376957	5	3	0.364193	1
GO:0002339 B cell selection	5	0.347	1	3	0.024	0.100289	5	3	0.500357	1
GO:0002378 immunoglobulin biosynthetic process	3	0.701	1	3	0.321	0.464788	3	3	0.701921	1
GO:0002432 granuloma formation	3	0.015	0.292765	3	0.04	0.130814	3	3	0.457026	1
GO:0002434 immune complex clearance	3	0.017	0.308134	3	0.056	0.161039	3	3	0.25381	1
GO:0002476 antigen processing and presentation of endogenous peptide antigen via MHC class Ib	4	0.001	0.0658342	3	0.149	0.292904	4	3	0.287858	1
GO:0002477 antigen processing and presentation of exogenous peptide antigen via MHC class Ib	3	0	0	3	0.034	0.119832	3	3	0.287858	1
GO:0002481 antigen processing and presentation of exogenous protein antigen via MHC class Ib, TAP-dependent	3	0	0	3	0.024	0.100289	3	3	0.373707	1
GO:0002484 antigen processing and presentation of endogenous peptide antigen via MHC class I via ER pathway	3	0.003	0.124163	3	0.144	0.286781	3	3	0.287858	1
GO:0002485 antigen processing and presentation of endogenous peptide antigen via MHC class I via ER pathway, TAP-dependent	3	0.009	0.228251	3	0.136	0.277003	3	3	0.353578	1
GO:0002538 arachidonic acid metabolite production involved in inflammatory response	4	0.031	0.391926	3	0.01	0.0633039	4	3	0.433693	1
GO:0002584 negative regulation of antigen processing and presentation of peptide antigen	4	0.629	1	3	0.216	0.365091	4	3	0.517966	1
GO:0002585 positive regulation of antigen processing and presentation of peptide antigen	3	0.166	0.839314	3	0.41	0.544161	3	3	0.382357	1
GO:0002586 regulation of antigen processing and presentation of peptide antigen via MHC class II	4	0.874	1	3	0.149	0.292904	4	3	0.861255	1
GO:0002589 regulation of antigen processing and presentation of peptide antigen via MHC class I	3	0.008	0.213546	3	0.177	0.325036	3	3	0.341509	1
GO:0002874 regulation of chronic inflammatory response to antigenic stimulus	3	0.294	1	3	0.165	0.311196	3	3	0.545943	1
GO:0003162 atrioventricular node development	3	0.954	1	3	0.253	0.401156	3	3	0.763902	1
GO:0003340 negative regulation of mesenchymal to epithelial transition involved in metanephros morphogenesis	3	0.962	1	3	0.033	0.118048	3	3	0.819231	1
GO:0006015 5-phosphoribose 1-diphosphate biosynthetic process	3	0.053	0.50671	3	0.723	0.81506	3	3	0.658949	1
GO:0006172 ADP biosynthetic process	3	0.224	0.956366	3	0.01	0.0633039	3	3	0.786844	1
GO:0006404 RNA import into nucleus	3	0.649	1	3	0.642	0.752004	3	3	0.827018	1
GO:0006419 alanyl-tRNA aminoacylation	3	0.677	1	3	0.856	0.913503	3	3	0.538766	1
GO:0006624 vacuolar protein processing	3	0.806	1	3	0.317	0.460368	3	3	0.961501	1
GO:0007089 traversing start control point of mitotic cell cycle	3	0.307	1	3	0.209	0.35849	3	3	0.61401	1
GO:0007228 positive regulation of hh target transcription factor activity	3	0.937	1	3	0.924	0.962673	3	3	0.954049	1
GO:0007258 JUN phosphorylation	4	0.691	1	3	0.356	0.495596	4	3	0.728926	1
GO:0008063 Toll signaling pathway	7	0.022	0.342144	3	0.389	0.525035	7	3	0.428433	1
GO:0009189 deoxyribonucleoside diphosphate biosynthetic process	4	0.164	0.833847	3	0.155	0.300077	4	3	0.889996	1
GO:0010728 regulation of hydrogen peroxide biosynthetic process	3	0.806	1	3	0.372	0.509626	3	3	0.990397	1
GO:0010956 negative regulation of calcidiol 1-monooxygenase activity	3	0.565	1	3	0.076	0.195584	3	3	0.744767	1
GO:0010963 regulation of L-arginine import	3	0.793	1	3	0.01	0.0633039	3	3	0.952556	1
GO:0010979 regulation of vitamin D 24-hydroxylase activity	3	0.78	1	3	0.069	0.183723	3	3	0.794232	1
GO:0010980 positive regulation of vitamin D 24-hydroxylase activity	3	0.786	1	3	0.06	0.168049	3	3	0.775528	1
GO:0014055 acetylcholine secretion, neurotransmission	6	0.679	1	3	0.233	0.383244	6	3	0.483907	1
GO:0014056 regulation of acetylcholine secretion, neurotransmission	6	0.684	1	3	0.221	0.3703	6	3	0.433693	1
GO:0015803 branched-chain amino acid transport	3	0.531	1	3	0.71	0.805408	3	3	0.555075	1
GO:0015808 L-alanine transport	5	0.344	1	3	0.767	0.846663	5	3	0.559472	1
GO:0015820 leucine transport	3	0.516	1	3	0.689	0.790518	3	3	0.563765	1
GO:0017187 peptidyl-glutamic acid carboxylation	3	0.496	1	3	0.56	0.678269	3	3	0.924703	1
GO:0019065 receptor-mediated endocytosis of virus by host cell	3	0.518	1	3	0.037	0.125528	3	3	0.565874	1
GO:0021553 olfactory nerve development	3	0.836	1	3	0.536	0.656968	3	3	0.900917	1
GO:0021817 nucleokinesis involved in cell motility in cerebral cortex radial glia guided migration	3	0.643	1	3	0.961	0.983799	3	3	0.686251	1
GO:0021823 cerebral cortex tangential migration using cell-cell interactions	3	0.58	1	3	0.107	0.239652	3	3	0.538766	1
GO:0021827 postnatal olfactory bulb interneuron migration	3	0.569	1	3	0.101	0.231904	3	3	0.538766	1
GO:0021847 ventricular zone neuroblast division	3	0.912	1	3	0.067	0.180343	3	3	0.589521	1
GO:0021965 spinal cord ventral commissure morphogenesis	3	0.684	1	3	0.118	0.25405	3	3	0.780279	1
GO:0030382 sperm mitochondrion organization	4	0.66	1	3	0.365	0.50361	4	3	0.587655	1
GO:0030473 nuclear migration along microtubule	3	0.623	1	3	0.95	0.97632	3	3	0.691162	1
GO:0031508 pericentric heterochromatin assembly	4	0.607	1	3	0.146	0.289196	4	3	0.517966	1
GO:0032831 positive regulation of CD4-positive, CD25-positive, alpha-beta regulatory T cell differentiation	3	0.232	0.968076	3	0.162	0.307579	3	3	0.717946	1
GO:0034633 retinol transport	3	0.408	1	3	0.337	0.478885	3	3	0.622124	1
GO:0035617 stress granule disassembly	3	0.734	1	3	0.264	0.411407	3	3	0.700744	1
GO:0035672 oligopeptide transmembrane transport	3	0.277	1	3	0.159	0.304184	3	3	0.928497	1
GO:0035696 monocyte extravasation	4	0.295	1	3	0.056	0.161039	4	3	0.452697	1
GO:0035697 CD8-positive, alpha-beta T cell extravasation	4	0.186	0.883813	3	0.056	0.161039	4	3	0.643429	1
GO:0035747 natural killer cell chemotaxis	5	0.826	1	3	0.274	0.419396	5	3	0.974122	1
GO:0035799 ureter maturation	4	0.591	1	3	0.122	0.259839	4	3	0.79879	1
GO:0036337 Fas signaling pathway	3	0.224	0.956366	3	0.108	0.240996	3	3	0.565874	1
GO:0036446 myofibroblast differentiation	3	0.372	1	3	0.004	0.0409239	3	3	0.830444	1
GO:0038026 reelin-mediated signaling pathway	3	0.188	0.886684	3	0.215	0.364136	3	3	0.958523	1
GO:0042091 interleukin-10 biosynthetic process	3	0.503	1	3	0.217	0.366124	3	3	0.538766	1
GO:0042360 vitamin E metabolic process	3	0.141	0.777243	3	0.273	0.418717	3	3	0.520717	1
GO:0042938 dipeptide transport	3	0.135	0.767477	3	0.165	0.311196	3	3	0.422924	1
GO:0043578 nuclear matrix organization	3	0.658	1	3	0.71	0.805408	3	3	0.810445	1
GO:0044027 hypermethylation of CpG island	5	0.165	0.837256	3	0.089	0.215489	5	3	0.764884	1
GO:0044313 protein K6-linked deubiquitination	3	0.822	1	3	0.925	0.962982	3	3	0.681254	1
GO:0044337 canonical Wnt signaling pathway involved in positive regulation of apoptotic process	3	0.143	0.783847	3	0.016	0.0819592	3	3	0.480377	1
GO:0045074 regulation of interleukin-10 biosynthetic process	3	0.492	1	3	0.225	0.37442	3	3	0.503437	1
GO:0045163 clustering of voltage-gated potassium channels	3	0.18	0.867962	3	0.416	0.549703	3	3	0.57608	1
GO:0045218 zonula adherens maintenance	3	0.706	1	3	0.296	0.440577	3	3	0.984484	1
GO:0045415 negative regulation of interleukin-8 biosynthetic process	4	0.022	0.342144	3	0.029	0.110371	4	3	0.48735	1
GO:0045636 positive regulation of melanocyte differentiation	5	0.747	1	3	0.024	0.100289	5	3	0.944324	1
GO:0045914 negative regulation of catecholamine metabolic process	3	0.448	1	3	0.052	0.153373	3	3	0.843116	1
GO:0045963 negative regulation of dopamine metabolic process	3	0.451	1	3	0.052	0.153373	3	3	0.843952	1
GO:0046100 hypoxanthine metabolic process	3	0.325	1	3	0.003	0.0354075	3	3	0.708889	1
GO:0046101 hypoxanthine biosynthetic process	3	0.34	1	3	0.006	0.0495123	3	3	0.717946	1
GO:0046102 inosine metabolic process	3	0.072	0.580477	3	0.003	0.0354075	3	3	0.373707	1
GO:0046122 purine deoxyribonucleoside metabolic process	3	0.518	1	3	0.005	0.0452252	3	3	0.373707	1
GO:0046391 5-phosphoribose 1-diphosphate metabolic process	3	0.057	0.522541	3	0.754	0.83716	3	3	0.670986	1
GO:0046684 response to pyrethroid	3	0.151	0.804447	3	0.37	0.50781	3	3	0.517966	1
GO:0046813 receptor-mediated virion attachment to host cell	4	0.269	1	3	0.112	0.246272	4	3	0.327411	1
GO:0046864 isoprenoid transport	3	0.403	1	3	0.321	0.464788	3	3	0.628412	1
GO:0046865 terpenoid transport	3	0.404	1	3	0.342	0.483027	3	3	0.602121	1
GO:0048294 negative regulation of isotype switching to IgE isotypes	3	0.399	1	3	0.026	0.103972	3	3	0.955542	1
GO:0052564 response to immune response of other organism involved in symbiotic interaction	3	0.003	0.124163	3	0.501	0.627187	3	3	0.373707	1
GO:0052572 response to host immune response	3	0.005	0.168069	3	0.503	0.628959	3	3	0.353578	1
GO:0060166 olfactory pit development	3	0.783	1	3	0.086	0.21111	3	3	0.957033	1
GO:0060523 prostate epithelial cord elongation	3	0.893	1	3	0.102	0.233488	3	3	0.900917	1
GO:0060535 trachea cartilage morphogenesis	4	0.921	1	3	0.469	0.597356	4	3	0.89078	1
GO:0061091 regulation of phospholipid translocation	3	0.432	1	3	0.021	0.0936512	3	3	0.64488	1
GO:0061092 positive regulation of phospholipid translocation	3	0.464	1	3	0.022	0.0959513	3	3	0.678723	1
GO:0061209 cell proliferation involved in mesonephros development	4	0.601	1	3	0.021	0.0936512	4	3	0.764884	1
GO:0070100 negative regulation of chemokine-mediated signaling pathway	4	0.643	1	3	0.312	0.455832	4	3	0.404563	1
GO:0070340 detection of bacterial lipopeptide	3	0.001	0.0658342	3	0.434	0.565744	3	3	0.341509	1
GO:0070671 response to interleukin-12	4	0.1	0.672987	3	0.177	0.325036	4	3	0.52342	1
GO:0070681 glutaminyl-tRNAGln biosynthesis via transamidation	3	0.418	1	3	0.963	0.984976	3	3	0.815734	1
GO:0070973 protein localization to endoplasmic reticulum exit site	3	0.68	1	3	0.076	0.195584	3	3	0.966704	1
GO:0071224 cellular response to peptidoglycan	4	0.315	1	3	0.715	0.809312	4	3	0.353578	1
GO:0071332 cellular response to fructose stimulus	3	0.269	1	3	0.523	0.645552	3	3	0.76684	1
GO:0071613 granzyme B production	3	0.316	1	3	0.202	0.351731	3	3	0.923943	1
GO:0071661 regulation of granzyme B production	3	0.273	1	3	0.205	0.354211	3	3	0.954049	1
GO:0071663 positive regulation of granzyme B production	3	0.329	1	3	0.213	0.362543	3	3	0.915554	1
GO:0071676 negative regulation of mononuclear cell migration	6	0.777	1	3	0.409	0.543265	6	3	0.557287	1
GO:0071707 immunoglobulin heavy chain V-D-J recombination	3	0.945	1	3	0.105	0.237041	3	3	0.887639	1
GO:0071725 response to triacyl bacterial lipopeptide	3	0.003	0.124163	3	0.03	0.112276	3	3	0.364193	1
GO:0071727 cellular response to triacyl bacterial lipopeptide	3	0.002	0.102468	3	0.03	0.112276	3	3	0.390307	1
GO:0072125 negative regulation of glomerular mesangial cell proliferation	4	0.601	1	3	0.026	0.103972	4	3	0.741654	1
GO:0072361 regulation of glycolytic process by regulation of transcription from RNA polymerase II promoter	3	0.98	1	3	0.279	0.423947	3	3	0.764884	1
GO:0072717 cellular response to actinomycin D	3	0.638	1	3	0.226	0.375752	3	3	0.863691	1
GO:0075509 endocytosis involved in viral entry into host cell	3	0.535	1	3	0.03	0.112276	3	3	0.565874	1
GO:0090194 negative regulation of glomerulus development	4	0.576	1	3	0.021	0.0936512	4	3	0.756962	1
GO:0090292 nuclear matrix anchoring at nuclear membrane	3	0.644	1	3	0.692	0.792511	3	3	0.790553	1
GO:0097112 gamma-aminobutyric acid receptor clustering	3	0.203	0.915951	3	0.479	0.60686	3	3	0.84977	1
GO:0097155 fasciculation of sensory neuron axon	3	0.357	1	3	0.488	0.614591	3	3	0.565874	1
GO:0097195 pilomotor reflex	3	0.744	1	3	0.107	0.239652	3	3	0.857175	1
GO:0097252 oligodendrocyte apoptotic process	3	0.85	1	3	0.11	0.243797	3	3	0.703093	1
GO:0098679 regulation of carbohydrate catabolic process by regulation of transcription from RNA polymerase II promoter	3	0.983	1	3	0.29	0.434654	3	3	0.761932	1
GO:0099011 neuronal dense core vesicle exocytosis	4	0.317	1	3	0.523	0.645552	4	3	0.790553	1
GO:0099525 presynaptic dense core vesicle exocytosis	4	0.29	1	3	0.482	0.609174	4	3	0.831297	1
GO:0099552 trans-synaptic signaling by lipid, modulating synaptic transmission	3	0.958	1	3	0.112	0.246272	3	3	0.626856	1
GO:0099553 trans-synaptic signaling by endocannabinoid, modulating synaptic transmission	3	0.943	1	3	0.103	0.234317	3	3	0.570023	1
GO:0099558 maintenance of synapse structure	3	0.202	0.91371	3	0.323	0.466697	3	3	0.637535	1
GO:1900186 negative regulation of clathrin-dependent endocytosis	3	0.691	1	3	0.48	0.607462	3	3	0.955542	1
GO:1900748 positive regulation of vascular endothelial growth factor signaling pathway	3	0.479	1	3	0.949	0.975959	3	3	0.646323	1
GO:1901079 positive regulation of relaxation of muscle	3	0.313	1	3	0.123	0.261046	3	3	0.790553	1
GO:1901300 positive regulation of hydrogen peroxide-mediated programmed cell death	4	0.874	1	3	0.157	0.302046	4	3	0.572064	1
GO:1901963 regulation of cell proliferation involved in outflow tract morphogenesis	3	0.845	1	3	0.025	0.102561	3	3	0.726758	1
GO:1902263 apoptotic process involved in embryonic digit morphogenesis	3	0.547	1	3	0.024	0.100289	3	3	0.689942	1
GO:1902445 regulation of mitochondrial membrane permeability involved in programmed necrotic cell death	3	0.971	1	3	0.122	0.259839	3	3	0.710035	1
GO:1903598 positive regulation of gap junction assembly	3	0.817	1	3	0.01	0.0633039	3	3	0.716827	1
GO:1903818 positive regulation of voltage-gated potassium channel activity	5	0.467	1	3	0.973	0.989358	5	3	0.598598	1
GO:1903964 monounsaturated fatty acid metabolic process	4	0.128	0.754695	3	0.448	0.57799	4	3	0.688716	1
GO:1903966 monounsaturated fatty acid biosynthetic process	4	0.123	0.745273	3	0.423	0.556414	4	3	0.668358	1
GO:1904098 regulation of protein O-linked glycosylation	3	0.917	1	3	0.645	0.754052	3	3	0.911721	1
GO:1904100 positive regulation of protein O-linked glycosylation	3	0.896	1	3	0.692	0.792511	3	3	0.907104	1
GO:1904457 positive regulation of neuronal action potential	3	0.435	1	3	0.135	0.275824	3	3	0.541192	1
GO:1904694 negative regulation of vascular smooth muscle contraction	3	0.535	1	3	0.853	0.91127	3	3	0.703093	1
GO:1904760 regulation of myofibroblast differentiation	3	0.35	1	3	0.011	0.0665836	3	3	0.818359	1
GO:1905146 lysosomal protein catabolic process	3	0.709	1	3	0.204	0.353497	3	3	0.961501	1
GO:1990442 intrinsic apoptotic signaling pathway in response to nitrosative stress	3	0.557	1	3	0.062	0.171766	3	3	0.810445	1
GO:1990523 bone regeneration	3	0.418	1	3	0.529	0.650877	3	3	0.746827	1
GO:2000054 negative regulation of Wnt signaling pathway involved in dorsal/ventral axis specification	3	0.839	1	3	0.017	0.0846347	3	3	0.699563	1
GO:2000302 positive regulation of synaptic vesicle exocytosis	3	0.178	0.865213	3	0.753	0.836667	3	3	0.656197	1
GO:2000412 positive regulation of thymocyte migration	3	0.098	0.667303	3	0.004	0.0409239	3	3	0.790553	1
GO:2000437 regulation of monocyte extravasation	3	0.263	1	3	0.061	0.169871	3	3	0.457026	1
GO:2000449 regulation of CD8-positive, alpha-beta T cell extravasation	3	0.16	0.825065	3	0.059	0.166175	3	3	0.626856	1
GO:2000501 regulation of natural killer cell chemotaxis	5	0.828	1	3	0.277	0.422058	5	3	0.958523	1
GO:2000503 positive regulation of natural killer cell chemotaxis	4	0.764	1	3	0.219	0.368343	4	3	0.993353	1
GO:2000660 negative regulation of interleukin-1-mediated signaling pathway	3	0.034	0.408321	3	0.159	0.304184	3	3	0.327411	1
GO:2000670 positive regulation of dendritic cell apoptotic process	3	0.722	1	3	0.165	0.311196	3	3	0.476755	1
GO:2000705 regulation of dense core granule biogenesis	3	0.405	1	3	0.052	0.153373	3	3	0.578058	1
GO:2000969 positive regulation of AMPA receptor activity	4	0.158	0.820412	3	0.025	0.102561	4	3	0.602121	1
GO:2001180 negative regulation of interleukin-10 secretion	3	0.17	0.847732	3	0.055	0.159135	3	3	0.557287	1
GO:2001245 regulation of phosphatidylcholine biosynthetic process	3	0.123	0.745273	3	0.483	0.610029	3	3	0.914022	1
GO:0002189 ribose phosphate diphosphokinase complex	4	0.48	1	3	0.841	0.999352	4	3	0.71906	0.999642
GO:0002193 MAML1-RBP-Jkappa- ICN1 complex	3	0.952	1	3	0.253	0.544407	3	3	0.820971	0.999642
GO:0005896 interleukin-6 receptor complex	3	0.454	1	3	0.169	0.441924	3	3	0.310256	0.999642
GO:0005945 6-phosphofructokinase complex	3	0.347	1	3	0.3	0.592699	3	3	0.631492	0.999642
GO:0005958 DNA-dependent protein kinase-DNA ligase 4 complex	3	0.317	1	3	0.707	0.933261	3	3	0.782165	0.999642
GO:0008282 ATP-sensitive potassium channel complex	4	0.371	1	3	0.221	0.50217	4	3	0.750914	0.999642
GO:0016939 kinesin II complex	3	0.113	0.995029	3	0.187	0.462579	3	3	0.724577	0.999642
GO:0030956 glutamyl-tRNA(Gln) amidotransferase complex	3	0.417	1	3	0.954	1	3	3	0.831297	0.999642
GO:0031466 Cul5-RING ubiquitin ligase complex	5	0.925	1	3	0.662	0.901842	5	3	0.801504	0.999642
GO:0043259 laminin-10 complex	3	0.615	1	3	0.251	0.542063	3	3	0.759952	0.999642
GO:0044302 dentate gyrus mossy fiber	3	0.872	1	3	0.777	0.975895	3	3	0.695991	0.999642
GO:0070032 synaptobrevin 2-SNAP-25-syntaxin-1a-complexin I complex	4	0.306	1	3	0.066	0.259639	4	3	0.461215	0.999642
GO:0098888 extrinsic component of presynaptic membrane	3	0.582	1	3	0.212	0.49173	3	3	0.580015	0.999642
GO:0099073 mitochondrion-derived vesicle	3	0.991	1	3	0.592	0.854048	3	3	0.526079	0.999642
GO:1904115 axon cytoplasm	3	0.225	1	3	0.202	0.480389	3	3	0.650602	0.999642
GO:0001642 group III metabotropic glutamate receptor activity	4	0.45	1	3	0.813	0.958362	4	3	0.791475	0.99996
GO:0003726 double-stranded RNA adenosine deaminase activity	3	0.058	0.885303	3	0.648	0.887433	3	3	0.310256	0.99996
GO:0003872 6-phosphofructokinase activity	3	0.383	1	3	0.282	0.633356	3	3	0.637535	0.99996
GO:0003951 NAD+ kinase activity	3	0.282	1	3	0.844	0.971947	3	3	0.727844	0.99996
GO:0004075 biotin carboxylase activity	5	0.854	1	3	0.546	0.819382	5	3	0.823571	0.99996
GO:0004082 bisphosphoglycerate mutase activity	3	0.241	1	3	0.028	0.24278	3	3	0.480377	0.99996
GO:0004366 glycerol-3-phosphate O-acyltransferase activity	4	0.655	1	3	0.762	0.938991	4	3	0.744767	0.99996
GO:0004416 hydroxyacylglutathione hydrolase activity	3	0.089	0.953946	3	0.114	0.439217	3	3	0.531271	0.99996
GO:0004619 phosphoglycerate mutase activity	3	0.225	1	3	0.031	0.254402	3	3	0.46921	0.99996
GO:0004719 protein-L-isoaspartate (D-aspartate) O-methyltransferase activity	3	0.526	1	3	0.931	1	3	3	0.792396	0.99996
GO:0004749 ribose phosphate diphosphokinase activity	4	0.462	1	3	0.805	0.955492	4	3	0.734285	0.99996
GO:0004768 stearoyl-CoA 9-desaturase activity	5	0.09	0.953946	3	0.485	0.780217	5	3	0.417135	0.99996
GO:0004774 succinate-CoA ligase activity	3	0.352	1	3	0.383	0.708245	3	3	0.984484	0.99996
GO:0004813 alanine-tRNA ligase activity	3	0.675	1	3	0.881	0.989597	3	3	0.57608	0.99996
GO:0004974 leukotriene receptor activity	4	0.999	1	3	0.264	0.61816	4	3	0.942823	0.99996
GO:0005219 ryanodine-sensitive calcium-release channel activity	3	0.271	1	3	0.316	0.660629	3	3	0.725669	0.99996
GO:0005519 cytoskeletal regulatory protein binding	3	0.481	1	3	0.232	0.584148	3	3	0.683764	0.99996
GO:0008184 glycogen phosphorylase activity	3	0.068	0.903663	3	0.738	0.92943	3	3	0.578058	0.99996
GO:0008321 Ral guanyl-nucleotide exchange factor activity	3	0.584	1	3	0.391	0.714724	3	3	0.918611	0.99996
GO:0008330 protein tyrosine/threonine phosphatase activity	3	0.125	0.987172	3	0.513	0.801527	3	3	0.517966	0.99996
GO:0008454 alpha-1,3-mannosylglycoprotein 4-beta-N-acetylglucosaminyltransferase activity	3	0.528	1	3	0.803	0.955098	3	3	0.843952	0.99996
GO:0015018 galactosylgalactosylxylosylprotein 3-beta-glucuronosyltransferase activity	3	0.379	1	3	0.929	1	3	3	0.803305	0.99996
GO:0015165 pyrimidine nucleotide-sugar transmembrane transporter activity	4	0.994	1	3	0.561	0.829136	4	3	0.774572	0.99996
GO:0015440 peptide-transporting ATPase activity	3	0.002	0.315143	3	0.395	0.715333	3	3	0.327411	0.99996
GO:0016421 CoA carboxylase activity	6	0.608	1	3	0.936	1	6	3	0.889996	0.99996
GO:0019788 NEDD8 transferase activity	4	0.31	1	3	0.257	0.608744	4	3	0.636039	0.99996
GO:0019976 interleukin-2 binding	3	0.025	0.713147	3	0.159	0.489898	3	3	0.397679	0.99996
GO:0031686 A1 adenosine receptor binding	3	0.472	1	3	0.135	0.466522	3	3	0.708889	0.99996
GO:0031727 CCR2 chemokine receptor binding	4	0.455	1	3	0.652	0.891773	4	3	0.736406	0.99996
GO:0031800 type 3 metabotropic glutamate receptor binding	3	0.469	1	3	0.027	0.239925	3	3	0.711177	0.99996
GO:0031826 type 2A serotonin receptor binding	3	0.597	1	3	0.198	0.540252	3	3	0.75395	0.99996
GO:0032137 guanine/thymine mispair binding	3	0.349	1	3	0.218	0.568442	3	3	0.681254	0.99996
GO:0032896 palmitoyl-CoA 9-desaturase activity	4	0.157	1	3	0.423	0.730884	4	3	0.687486	0.99996
GO:0035373 chondroitin sulfate proteoglycan binding	3	0.126	0.987995	3	0.326	0.670111	3	3	0.461215	0.99996
GO:0036042 long-chain fatty acyl-CoA binding	3	0.189	1	3	0.064	0.353524	3	3	0.948819	0.99996
GO:0046538 2,3-bisphosphoglycerate-dependent phosphoglycerate mutase activity	3	0.243	1	3	0.025	0.228785	3	3	0.483907	0.99996
GO:0046978 TAP1 binding	3	0.009	0.509077	3	0.444	0.747606	3	3	0	0
GO:0046979 TAP2 binding	3	0.003	0.3309	3	0.435	0.739121	3	3	0.341509	0.99996
GO:0050567 glutaminyl-tRNA synthase (glutamine-hydrolyzing) activity	3	0.43	1	3	0.956	1	3	3	0.81133	0.99996
GO:0070404 NADH binding	3	0.752	1	3	0.104	0.423901	3	3	0.480377	0.99996
GO:0072345 NAADP-sensitive calcium-release channel activity	4	0.222	1	3	0.996	1	4	3	0.570023	0.99996
GO:0099583 neurotransmitter receptor activity involved in regulation of postsynaptic cytosolic calcium ion concentration	3	0.54	1	3	0.133	0.462215	3	3	0.561631	0.99996
GO:0000320 re-entry into mitotic cell cycle	4	0.542	1	2	0.041	0.133159	4	4	0.703093	1
GO:0000393 spliceosomal conformational changes to generate catalytic conformation	4	0.998	1	2	0.632	0.742717	4	4	0.912489	1
GO:0000454 snoRNA guided rRNA pseudouridine synthesis	4	0.545	1	2	0.816	0.882764	4	4	0.948819	1
GO:0000480 endonucleolytic cleavage in 5'-ETS of tricistronic rRNA transcript (SSU-rRNA, 5.8S rRNA, LSU-rRNA)	4	0.911	1	2	0.643	0.752766	4	4	0.971157	1
GO:0000492 box C/D snoRNP assembly	5	0.818	1	2	0.553	0.672441	5	4	0.773613	1
GO:0000957 mitochondrial RNA catabolic process	4	0.881	1	2	0.95	0.97632	4	4	0.623712	1
GO:0000960 regulation of mitochondrial RNA catabolic process	4	0.904	1	2	0.956	0.980279	4	4	0.665704	1
GO:0000966 RNA 5'-end processing	4	0.891	1	2	0.653	0.760983	4	4	0.634533	1
GO:0001561 fatty acid alpha-oxidation	5	0.073	0.583357	2	0.183	0.331447	5	4	0.764884	1
GO:0001692 histamine metabolic process	4	0.134	0.765215	2	0.14	0.281909	4	4	0.888425	1
GO:0001878 response to yeast	5	0.265	1	2	0.303	0.446845	5	4	0.859626	1
GO:0001907 killing by symbiont of host cells	4	0.073	0.583357	2	0.006	0.0495123	4	4	0.951809	1
GO:0001920 negative regulation of receptor recycling	4	0.881	1	2	0.949	0.975959	4	4	0.897031	1
GO:0001923 B-1 B cell differentiation	4	0.133	0.763968	2	0.89	0.937825	4	4	0.876553	1
GO:0001927 exocyst assembly	4	0.148	0.797493	2	0.313	0.456717	4	4	0.895472	1
GO:0001996 positive regulation of heart rate by epinephrine-norepinephrine	4	0.993	1	2	0.007	0.0532963	4	4	0.883696	1
GO:0002188 translation reinitiation	4	0.921	1	2	0.309	0.452503	4	4	0.81133	1
GO:0002322 B cell proliferation involved in immune response	5	0.031	0.391926	2	0.118	0.25405	5	4	0.713449	1
GO:0002669 positive regulation of T cell anergy	4	0.998	1	2	0.045	0.140427	4	4	0.871755	1
GO:0002740 negative regulation of cytokine secretion involved in immune response	5	0.403	1	2	0.006	0.0495123	5	4	0.465273	1
GO:0002913 positive regulation of lymphocyte anergy	4	1	1	2	0.041	0.133159	4	4	0.876553	1
GO:0003104 positive regulation of glomerular filtration	4	0.091	0.647032	2	0.107	0.239652	4	4	0.744767	1
GO:0003166 bundle of His development	4	0.946	1	2	0.161	0.306608	4	4	0.974122	1
GO:0003419 growth plate cartilage chondrocyte proliferation	4	1	1	2	0.052	0.153373	4	4	0.813977	1
GO:0006041 glucosamine metabolic process	4	0.448	1	2	0.135	0.275824	4	4	0.991136	1
GO:0006048 UDP-N-acetylglucosamine biosynthetic process	4	0.949	1	2	0.902	0.947355	4	4	0.907104	1
GO:0006189 'de novo' IMP biosynthetic process	4	0.879	1	2	0.501	0.627187	4	4	0.889211	1
GO:0006686 sphingomyelin biosynthetic process	6	0.992	1	2	0.427	0.559915	6	4	0.757961	1
GO:0006995 cellular response to nitrogen starvation	5	0.998	1	2	0.014	0.0760606	5	4	0.443563	1
GO:0007042 lysosomal lumen acidification	6	0.995	1	2	0.056	0.161039	6	4	0.886852	1
GO:0007060 male meiosis chromosome segregation	4	0.715	1	2	0.732	0.822067	4	4	0.800601	1
GO:0007354 zygotic determination of anterior/posterior axis, embryo	5	0.613	1	2	0.354	0.493999	5	4	0.626856	1
GO:0007412 axon target recognition	4	0.498	1	2	0.019	0.0896709	4	4	0.829589	1
GO:0007418 ventral midline development	4	0.131	0.759692	2	0.377	0.513812	4	4	0.886852	1
GO:0008065 establishment of blood-nerve barrier	4	0.872	1	2	0.008	0.0565634	4	4	0.817486	1
GO:0009092 homoserine metabolic process	4	0.36	1	2	0.909	0.952117	4	4	0.848942	1
GO:0009115 xanthine catabolic process	5	0.061	0.537494	2	0.092	0.21954	5	4	0.422924	1
GO:0009137 purine nucleoside diphosphate catabolic process	5	0.958	1	2	0.174	0.321172	5	4	0.830444	1
GO:0009162 deoxyribonucleoside monophosphate metabolic process	6	0.871	1	2	0.511	0.636426	6	4	0.933035	1
GO:0009181 purine ribonucleoside diphosphate catabolic process	5	0.947	1	2	0.196	0.345478	5	4	0.83385	1
GO:0009217 purine deoxyribonucleoside triphosphate catabolic process	5	0.021	0.333533	2	0.091	0.218018	5	4	0.864502	1
GO:0009838 abscission	4	0.994	1	2	0.833	0.89607	4	4	0.878146	1
GO:0010510 regulation of acetyl-CoA biosynthetic process from pyruvate	4	0.63	1	2	0.73	0.820617	4	4	0.417135	1
GO:0010511 regulation of phosphatidylinositol biosynthetic process	6	0.862	1	2	0.24	0.389357	6	4	0.795147	1
GO:0010961 cellular magnesium ion homeostasis	5	0.099	0.671235	2	0.103	0.234317	5	4	0.602121	1
GO:0010986 positive regulation of lipoprotein particle clearance	4	0.045	0.46828	2	0.023	0.0980969	4	4	0.925463	1
GO:0014028 notochord formation	5	0.535	1	2	0.089	0.215489	5	4	0.682512	1
GO:0014891 striated muscle atrophy	5	0.875	1	2	0.186	0.334947	5	4	0.844786	1
GO:0015691 cadmium ion transport	4	0.044	0.463185	2	0.316	0.459625	4	4	0.56796	1
GO:0015819 lysine transport	4	0.891	1	2	0.064	0.175084	4	4	0.570023	1
GO:0015884 folic acid transport	4	0.945	1	2	0.115	0.250492	4	4	0.672291	1
GO:0016080 synaptic vesicle targeting	4	0.372	1	2	0.437	0.568032	4	4	0.563765	1
GO:0016199 axon midline choice point recognition	5	0.187	0.885914	2	0.391	0.52679	5	4	0.46921	1
GO:0017185 peptidyl-lysine hydroxylation	4	0.818	1	2	0.355	0.494845	4	4	0.828733	1
GO:0019042 viral latency	4	0.802	1	2	0.059	0.166175	4	4	0.895472	1
GO:0019262 N-acetylneuraminate catabolic process	4	0.705	1	2	0.397	0.532587	4	4	0.889996	1
GO:0019276 UDP-N-acetylgalactosamine metabolic process	4	0.369	1	2	0.366	0.504343	4	4	0.775528	1
GO:0019346 transsulfuration	4	0.362	1	2	0.906	0.9499	4	4	0.838922	1
GO:0019364 pyridine nucleotide catabolic process	5	0.304	1	2	0.015	0.0789584	5	4	0.817486	1
GO:0019482 beta-alanine metabolic process	4	0.197	0.903966	2	0.881	0.931601	4	4	0.668358	1
GO:0019695 choline metabolic process	5	0.782	1	2	0.483	0.610029	5	4	0.631492	1
GO:0021886 hypothalamus gonadotrophin-releasing hormone neuron differentiation	4	0.409	1	2	0.316	0.459625	4	4	0.755961	1
GO:0021888 hypothalamus gonadotrophin-releasing hormone neuron development	4	0.414	1	2	0.299	0.443203	4	4	0.734285	1
GO:0021898 commitment of multipotent stem cells to neuronal lineage in forebrain	4	0.884	1	2	0.029	0.110371	4	4	0.653415	1
GO:0021913 regulation of transcription from RNA polymerase II promoter involved in ventral spinal cord interneuron specification	4	0.98	1	2	0.117	0.252583	4	4	0.802406	1
GO:0030043 actin filament fragmentation	4	0.65	1	2	0.046	0.14269	4	4	0.762918	1
GO:0030050 vesicle transport along actin filament	4	0.924	1	2	0.275	0.420158	4	4	0.790553	1
GO:0030091 protein repair	4	0.122	0.743112	2	0.617	0.729301	4	4	0.992614	1
GO:0030222 eosinophil differentiation	5	0.901	1	2	0.123	0.261046	5	4	0.583872	1
GO:0030242 pexophagy	4	0.348	1	2	0.719	0.812435	4	4	0.874158	1
GO:0030578 PML body organization	5	0.033	0.400859	2	0.073	0.190402	5	4	0.473035	1
GO:0031117 positive regulation of microtubule depolymerization	4	0.781	1	2	0.165	0.311196	4	4	0.64488	1
GO:0031120 snRNA pseudouridine synthesis	4	0.605	1	2	0.668	0.773436	4	4	0.982266	1
GO:0031443 fast-twitch skeletal muscle fiber contraction	4	0.992	1	2	0.71	0.805408	4	4	0.390307	1
GO:0031584 activation of phospholipase D activity	6	0.896	1	2	0.018	0.087192	6	4	0.608995	1
GO:0031860 telomeric 3' overhang formation	4	0.999	1	2	0.266	0.412815	4	4	0.824434	1
GO:0031944 negative regulation of glucocorticoid metabolic process	5	0.928	1	2	0.023	0.0980969	5	4	0.629957	1
GO:0031947 negative regulation of glucocorticoid biosynthetic process	5	0.912	1	2	0.021	0.0936512	5	4	0.636039	1
GO:0032020 ISG15-protein conjugation	5	0.007	0.199422	2	0.605	0.719067	5	4	0.390307	1
GO:0032304 negative regulation of icosanoid secretion	4	0.229	0.965066	2	0.01	0.0633039	4	4	0.893129	1
GO:0032364 oxygen homeostasis	5	0.683	1	2	0.186	0.334947	5	4	0.894692	1
GO:0032430 positive regulation of phospholipase A2 activity	4	0.687	1	2	0.104	0.235596	4	4	0.779333	1
GO:0032439 endosome localization	4	0.926	1	2	0.162	0.307579	4	4	0.963732	1
GO:0032815 negative regulation of natural killer cell activation	8	0.014	0.285071	2	0.76	0.841093	8	4	0.310256	1
GO:0032898 neurotrophin production	4	0.345	1	2	0.004	0.0409239	4	4	0.591369	1
GO:0033023 mast cell homeostasis	5	0.919	1	2	0.001	0.0194072	5	4	0.490713	1
GO:0033024 mast cell apoptotic process	5	0.91	1	2	0.004	0.0409239	5	4	0.476755	1
GO:0033025 regulation of mast cell apoptotic process	5	0.924	1	2	0.007	0.0532963	5	4	0.483907	1
GO:0033030 negative regulation of neutrophil apoptotic process	4	0.012	0.265631	2	0.374	0.511157	4	4	0.565874	1
GO:0033353 S-adenosylmethionine cycle	4	0.197	0.903966	2	0.98	0.993926	4	4	0.749896	1
GO:0034080 CENP-A containing nucleosome assembly	5	0.99	1	2	0.865	0.920044	5	4	0.443563	1
GO:0034085 establishment of sister chromatid cohesion	4	0.539	1	2	0.445	0.575599	4	4	0.994091	1
GO:0034184 positive regulation of maintenance of mitotic sister chromatid cohesion	5	0.999	1	2	0.684	0.786459	5	4	0.907875	1
GO:0034238 macrophage fusion	5	0.029	0.381443	2	0.005	0.0452252	5	4	0.327411	1
GO:0034334 adherens junction maintenance	4	0.985	1	2	0.418	0.551861	4	4	0.962245	1
GO:0034729 histone H3-K79 methylation	4	0.961	1	2	0.591	0.707115	4	4	0.736406	1
GO:0035021 negative regulation of Rac protein signal transduction	5	0.869	1	2	0.945	0.97424	5	4	0.98892	1
GO:0035290 trunk segmentation	4	0.415	1	2	0.32	0.463741	4	4	0.966704	1
GO:0035655 interleukin-18-mediated signaling pathway	5	0.729	1	2	0.007	0.0532963	5	4	0.725669	1
GO:0035795 negative regulation of mitochondrial membrane permeability	5	0.045	0.46828	2	0.009	0.0598675	5	4	0.698377	1
GO:0035826 rubidium ion transport	6	0.895	1	2	0.58	0.696555	6	4	0.57608	1
GO:0035934 corticosterone secretion	5	0.506	1	2	0.052	0.153373	5	4	0.778385	1
GO:0036135 Schwann cell migration	4	0.174	0.853937	2	0.389	0.525035	4	4	0.476755	1
GO:0036295 cellular response to increased oxygen levels	5	0.929	1	2	0.035	0.121676	5	4	0.461215	1
GO:0036296 response to increased oxygen levels	6	0.955	1	2	0.037	0.125528	6	4	0.448213	1
GO:0036484 trunk neural crest cell migration	4	0.428	1	2	0.315	0.458702	4	4	0.969673	1
GO:0036486 ventral trunk neural crest cell migration	4	0.426	1	2	0.289	0.43363	4	4	0.949567	1
GO:0036490 regulation of translation in response to endoplasmic reticulum stress	8	0.836	1	2	0.461	0.590111	8	4	0.879735	1
GO:0038003 opioid receptor signaling pathway	6	0.994	1	2	0.281	0.425869	6	4	0.704261	1
GO:0038027 apolipoprotein A-I-mediated signaling pathway	4	0.982	1	2	0.015	0.0789584	4	4	0.957778	1
GO:0038108 negative regulation of appetite by leptin-mediated signaling pathway	4	0.289	1	2	0.249	0.397408	4	4	0.404563	1
GO:0038165 oncostatin-M-mediated signaling pathway	4	0.848	1	2	0.193	0.342232	4	4	0.881322	1
GO:0038171 cannabinoid signaling pathway	4	0.32	1	2	0.342	0.483027	4	4	0.827018	1
GO:0039689 negative stranded viral RNA replication	4	0.717	1	2	0.712	0.80713	4	4	0.723481	1
GO:0040009 regulation of growth rate	4	0.957	1	2	0.034	0.119832	4	4	0.929254	1
GO:0042222 interleukin-1 biosynthetic process	4	0.345	1	2	0.082	0.204389	4	4	0.927739	1
GO:0042663 regulation of endodermal cell fate specification	5	1	1	2	0.297	0.441455	5	4	0.641969	1
GO:0043201 response to leucine	7	1	1	2	0.9	0.94565	7	4	0.759952	1
GO:0043328 protein targeting to vacuole involved in ubiquitin-dependent protein catabolic process via the multivesicular body sorting pathway	4	0.728	1	2	0.626	0.737219	4	4	0.942072	1
GO:0043380 regulation of memory T cell differentiation	4	0.286	1	2	0.031	0.114175	4	4	0.980046	1
GO:0043435 response to corticotropin-releasing hormone	4	0.432	1	2	0.068	0.182156	4	4	0.907875	1
GO:0043465 regulation of fermentation	4	0.786	1	2	0.49	0.616697	4	4	0.734285	1
GO:0043562 cellular response to nitrogen levels	5	0.997	1	2	0.012	0.0697491	5	4	0.428433	1
GO:0043570 maintenance of DNA repeat elements	4	0.46	1	2	0.023	0.0980969	4	4	0.780279	1
GO:0043985 histone H4-R3 methylation	4	0.54	1	2	0.16	0.305399	4	4	0.81133	1
GO:0044004 disruption by symbiont of host cell	4	0.067	0.564898	2	0.01	0.0633039	4	4	0.956287	1
GO:0044034 multi-organism biosynthetic process	4	0.711	1	2	0.715	0.809312	4	4	0.741654	1
GO:0045048 protein insertion into ER membrane	5	1	1	2	0.691	0.791968	5	4	0.688716	1
GO:0045347 negative regulation of MHC class II biosynthetic process	4	0.354	1	2	0.44	0.571094	4	4	0.921661	1
GO:0045356 positive regulation of interferon-alpha biosynthetic process	4	0.044	0.463185	2	0.991	0.99896	4	4	0.452697	1
GO:0045632 negative regulation of mechanoreceptor differentiation	4	0.682	1	2	0.071	0.187195	4	4	0.545943	1
GO:0045743 positive regulation of fibroblast growth factor receptor signaling pathway	6	0.903	1	2	0.133	0.273556	6	4	0.310256	1
GO:0045875 negative regulation of sister chromatid cohesion	4	0.974	1	2	0.526	0.648139	4	4	0.971157	1
GO:0046013 regulation of T cell homeostatic proliferation	4	0.515	1	2	0.03	0.112276	4	4	0.760943	1
GO:0046121 deoxyribonucleoside catabolic process	4	0.091	0.647032	2	0.366	0.504343	4	4	0.5932	1
GO:0046133 pyrimidine ribonucleoside catabolic process	5	0.926	1	2	0.036	0.123781	5	4	0.965219	1
GO:0046351 disaccharide biosynthetic process	4	0.675	1	2	0.11	0.243797	4	4	0.820102	1
GO:0046449 creatinine metabolic process	4	0.954	1	2	0.137	0.278249	4	4	0.695991	1
GO:0046469 platelet activating factor metabolic process	4	0.351	1	2	0.617	0.729301	4	4	0.840603	1
GO:0046604 positive regulation of mitotic centrosome separation	4	0.468	1	2	0.395	0.530944	4	4	0.629957	1
GO:0046726 positive regulation by virus of viral protein levels in host cell	4	0.113	0.713962	2	0.076	0.195584	4	4	0.827018	1
GO:0046836 glycolipid transport	6	0.962	1	2	0.464	0.592742	6	4	0.711177	1
GO:0046950 cellular ketone body metabolic process	7	0.926	1	2	0.772	0.850499	7	4	0.847283	1
GO:0046958 nonassociative learning	7	0.996	1	2	0.545	0.665237	7	4	0.898587	1
GO:0046984 regulation of hemoglobin biosynthetic process	5	0.136	0.767666	2	0.109	0.242294	5	4	0.704261	1
GO:0048104 establishment of body hair or bristle planar orientation	4	0.94	1	2	0.047	0.144512	4	4	0.975604	1
GO:0048105 establishment of body hair planar orientation	4	0.946	1	2	0.053	0.155228	4	4	0.970415	1
GO:0048295 positive regulation of isotype switching to IgE isotypes	4	0.739	1	2	0.179	0.327193	4	4	0.873358	1
GO:0048808 male genitalia morphogenesis	5	0.925	1	2	0.467	0.595514	5	4	0.52342	1
GO:0048861 leukemia inhibitory factor signaling pathway	4	1	1	2	0.053	0.155228	4	4	0.886064	1
GO:0050847 progesterone receptor signaling pathway	5	0.826	1	2	0.233	0.383244	5	4	0.670986	1
GO:0050915 sensory perception of sour taste	5	0.184	0.879573	2	0.614	0.726724	5	4	0.585773	1
GO:0051305 chromosome movement towards spindle pole	4	0.303	1	2	0.189	0.338206	4	4	0.956287	1
GO:0051309 female meiosis chromosome separation	4	1	1	2	0.474	0.602095	4	4	0.922422	1
GO:0051340 regulation of ligase activity	6	0.133	0.763968	2	0.224	0.373251	6	4	0.939065	1
GO:0051351 positive regulation of ligase activity	5	0.11	0.704111	2	0.23	0.380387	5	4	0.904788	1
GO:0051365 cellular response to potassium ion starvation	4	0.235	0.972926	2	0.026	0.103972	4	4	0.963732	1
GO:0051660 establishment of centrosome localization	5	0.863	1	2	0.314	0.457822	5	4	0.887639	1
GO:0051725 protein de-ADP-ribosylation	4	0.934	1	2	0.682	0.784878	4	4	0.762918	1
GO:0051791 medium-chain fatty acid metabolic process	5	0.159	0.823249	2	0.63	0.740598	5	4	0.695991	1
GO:0055093 response to hyperoxia	6	0.94	1	2	0.031	0.114175	6	4	0.433693	1
GO:0060022 hard palate development	6	0.788	1	2	0.082	0.204389	6	4	0.806888	1
GO:0060023 soft palate development	5	0.909	1	2	0.057	0.163043	5	4	0.595015	1
GO:0060137 maternal process involved in parturition	5	0.282	1	2	0.542	0.662919	5	4	0.591369	1
GO:0060221 retinal rod cell differentiation	4	0.143	0.783847	2	0.395	0.530944	4	4	0.636039	1
GO:0060447 bud outgrowth involved in lung branching	4	0.897	1	2	0.24	0.389357	4	4	0.987441	1
GO:0060528 secretory columnal luminar epithelial cell differentiation involved in prostate glandular acinus development	4	0.974	1	2	0.174	0.321172	4	4	0.57608	1
GO:0060620 regulation of cholesterol import	5	0.618	1	2	0.29	0.434654	5	4	0.703093	1
GO:0060666 dichotomous subdivision of terminal units involved in salivary gland branching	5	0.474	1	2	0.346	0.486351	5	4	0.887639	1
GO:0060686 negative regulation of prostatic bud formation	4	0.988	1	2	0.28	0.424824	4	4	0.738515	1
GO:0060689 cell differentiation involved in salivary gland development	5	0.86	1	2	0.035	0.121676	5	4	0.493999	1
GO:0060830 ciliary receptor clustering involved in smoothened signaling pathway	4	0.316	1	2	0.931	0.966889	4	4	0.678723	1
GO:0060913 cardiac cell fate determination	4	0.501	1	2	0.204	0.353497	4	4	0.856356	1
GO:0060926 cardiac pacemaker cell development	5	1	1	2	0.336	0.478095	5	4	0.581953	1
GO:0060948 cardiac vascular smooth muscle cell development	5	0.866	1	2	0.171	0.317894	5	4	0.602121	1
GO:0061031 endodermal digestive tract morphogenesis	4	0.786	1	2	0.099	0.229234	4	4	0.944324	1
GO:0061197 fungiform papilla morphogenesis	6	0.997	1	2	0.028	0.108151	6	4	0.56796	1
GO:0061641 CENP-A containing chromatin organization	5	0.989	1	2	0.897	0.943353	5	4	0.465273	1
GO:0061668 mitochondrial ribosome assembly	4	0.998	1	2	0.958	0.981795	4	4	0.945074	1
GO:0061819 telomeric DNA-containing double minutes formation	4	0.9	1	2	0.086	0.21111	4	4	0.781223	1
GO:0070309 lens fiber cell morphogenesis	6	0.964	1	2	0.072	0.188939	6	4	0.353578	1
GO:0070317 negative regulation of G0 to G1 transition	4	0.702	1	2	0.708	0.804291	4	4	0.813977	1
GO:0070366 regulation of hepatocyte differentiation	4	0.777	1	2	0.028	0.108151	4	4	0.661672	1
GO:0070384 Harderian gland development	4	0.626	1	2	0.111	0.244896	4	4	0.639022	1
GO:0070574 cadmium ion transmembrane transport	4	0.045	0.46828	2	0.305	0.448521	4	4	0.56796	1
GO:0070777 D-aspartate transport	4	0.524	1	2	0.32	0.463741	4	4	0.512317	1
GO:0070779 D-aspartate import	4	0.552	1	2	0.309	0.452503	4	4	0.515167	1
GO:0070837 dehydroascorbic acid transport	4	0.968	1	2	0.476	0.603973	4	4	0.985963	1
GO:0071233 cellular response to leucine	7	1	1	2	0.905	0.949314	7	4	0.775528	1
GO:0071286 cellular response to magnesium ion	5	0.892	1	2	0.012	0.0697491	5	4	0.749896	1
GO:0071335 hair follicle cell proliferation	4	0.086	0.632725	2	0.047	0.144512	4	4	0.86612	1
GO:0071374 cellular response to parathyroid hormone stimulus	4	0.947	1	2	0.272	0.418077	4	4	0.543584	1
GO:0071376 cellular response to corticotropin-releasing hormone stimulus	4	0.446	1	2	0.055	0.159135	4	4	0.910184	1
GO:0071455 cellular response to hyperoxia	5	0.926	1	2	0.041	0.133159	5	4	0.452697	1
GO:0071921 cohesin loading	4	0.552	1	2	0.432	0.563967	4	4	0.997784	1
GO:0071922 regulation of cohesin loading	4	0.523	1	2	0.467	0.595514	4	4	0.987441	1
GO:0072025 distal convoluted tubule development	5	0.95	1	2	0.027	0.106001	5	4	0.904015	1
GO:0072106 regulation of ureteric bud formation	4	0.612	1	2	0.141	0.28309	4	4	0.664366	1
GO:0072107 positive regulation of ureteric bud formation	4	0.632	1	2	0.124	0.262134	4	4	0.701921	1
GO:0072179 nephric duct formation	5	0.828	1	2	0.025	0.102561	5	4	0.650602	1
GO:0072221 metanephric distal convoluted tubule development	5	0.961	1	2	0.029	0.110371	5	4	0.897031	1
GO:0072235 metanephric distal tubule development	5	0.954	1	2	0.029	0.110371	5	4	0.89781	1
GO:0072236 metanephric loop of Henle development	4	0.912	1	2	0.019	0.0896709	4	4	0.639022	1
GO:0072718 response to cisplatin	5	0.057	0.522541	2	0.41	0.544161	5	4	0.443563	1
GO:0086017 Purkinje myocyte action potential	4	0.993	1	2	0.119	0.255545	4	4	0.795147	1
GO:0090086 negative regulation of protein deubiquitination	4	0.003	0.124163	2	0.508	0.633843	4	4	0.764884	1
GO:0090118 receptor-mediated endocytosis involved in cholesterol transport	5	0.062	0.541052	2	0.036	0.123781	5	4	0.457026	1
GO:0090155 negative regulation of sphingolipid biosynthetic process	4	0.716	1	2	0.841	0.902227	4	4	0.977085	1
GO:0090156 cellular sphingolipid homeostasis	4	0.711	1	2	0.843	0.903729	4	4	0.964475	1
GO:0090168 Golgi reassembly	4	0.598	1	2	0.579	0.695687	4	4	0.977085	1
GO:0090170 regulation of Golgi inheritance	4	0.583	1	2	0.612	0.725269	4	4	0.615657	1
GO:0090214 spongiotrophoblast layer developmental growth	4	1	1	2	0.559	0.677494	4	4	0.966704	1
GO:0090230 regulation of centromere complex assembly	4	0.623	1	2	0.659	0.766019	4	4	0.543584	1
GO:0090259 regulation of retinal ganglion cell axon guidance	4	0.904	1	2	0.3	0.443986	4	4	0.907875	1
GO:0090598 male anatomical structure morphogenesis	5	0.925	1	2	0.461	0.590111	5	4	0.555075	1
GO:0097029 mature conventional dendritic cell differentiation	4	0.28	1	2	0.05	0.149702	4	4	0.679992	1
GO:0097360 chorionic trophoblast cell proliferation	4	0.998	1	2	0.348	0.488205	4	4	0.921661	1
GO:0097428 protein maturation by iron-sulfur cluster transfer	6	0.901	1	2	0.76	0.841093	6	4	0.497212	1
GO:0097461 ferric iron import into cell	4	0.931	1	2	0.913	0.954978	4	4	0.905561	1
GO:0097490 sympathetic neuron projection extension	4	0.398	1	2	0.284	0.428475	4	4	0.954049	1
GO:0097491 sympathetic neuron projection guidance	4	0.434	1	2	0.292	0.436608	4	4	0.964475	1
GO:0098703 calcium ion import across plasma membrane	5	0.896	1	2	0.399	0.534556	5	4	0.920899	1
GO:0099010 modification of postsynaptic structure	5	0.184	0.879573	2	0.862	0.917825	5	4	0.736406	1
GO:1900147 regulation of Schwann cell migration	4	0.193	0.895638	2	0.385	0.521553	4	4	0.483907	1
GO:1900226 negative regulation of NLRP3 inflammasome complex assembly	4	0.002	0.102468	2	0.422	0.555535	4	4	0.327411	1
GO:1900242 regulation of synaptic vesicle endocytosis	4	0.449	1	2	0.93	0.966517	4	4	0.698377	1
GO:1900736 regulation of phospholipase C-activating G-protein coupled receptor signaling pathway	4	0.498	1	2	0.023	0.0980969	4	4	0.944324	1
GO:1900747 negative regulation of vascular endothelial growth factor signaling pathway	4	0.699	1	2	0.076	0.195584	4	4	0.422924	1
GO:1901098 positive regulation of autophagosome maturation	4	0.846	1	2	0.275	0.420158	4	4	0.848942	1
GO:1901382 regulation of chorionic trophoblast cell proliferation	4	1	1	2	0.353	0.493381	4	4	0.889211	1
GO:1902109 negative regulation of mitochondrial membrane permeability involved in apoptotic process	4	0.035	0.413684	2	0.008	0.0565634	4	4	0.704261	1
GO:1902498 regulation of protein autoubiquitination	4	0.865	1	2	0.856	0.913503	4	4	0.725669	1
GO:1902525 regulation of protein monoubiquitination	4	1	1	2	0.017	0.0846347	4	4	0.886064	1
GO:1902566 regulation of eosinophil activation	4	0.118	0.728173	2	0.094	0.221957	4	4	0.985963	1
GO:1902746 regulation of lens fiber cell differentiation	4	0.368	1	2	0.043	0.13688	4	4	0.819231	1
GO:1902774 late endosome to lysosome transport	5	0.863	1	2	0.741	0.828345	5	4	0.999261	1
GO:1902965 regulation of protein localization to early endosome	5	0.029	0.381443	2	0.325	0.468239	5	4	0.730004	1
GO:1902966 positive regulation of protein localization to early endosome	5	0.027	0.368488	2	0.318	0.461465	5	4	0.73322	1
GO:1903225 negative regulation of endodermal cell differentiation	4	0.997	1	2	0.054	0.157148	4	4	0.25381	1
GO:1903251 multi-ciliated epithelial cell differentiation	7	0.581	1	2	0.999	1	7	4	0.404563	1
GO:1903265 positive regulation of tumor necrosis factor-mediated signaling pathway	4	0.998	1	2	0.554	0.673168	4	4	0.998523	1
GO:1903333 negative regulation of protein folding	4	0.072	0.580477	2	0.75	0.83475	4	4	0.889996	1
GO:1903553 positive regulation of extracellular exosome assembly	4	0.118	0.728173	2	0.313	0.456717	4	4	0.679992	1
GO:1903797 positive regulation of inorganic anion transmembrane transport	4	0.881	1	2	0.061	0.169871	4	4	0.853071	1
GO:1903976 negative regulation of glial cell migration	4	0.546	1	2	0.755	0.837838	4	4	0.960757	1
GO:1904398 positive regulation of neuromuscular junction development	4	0.459	1	2	0.151	0.294911	4	4	0.802406	1
GO:1904468 negative regulation of tumor necrosis factor secretion	4	0.251	1	2	0.737	0.825282	4	4	0.816611	1
GO:1904849 positive regulation of cell chemotaxis to fibroblast growth factor	4	0.677	1	2	0.107	0.239652	4	4	0.878941	1
GO:1904995 negative regulation of leukocyte adhesion to vascular endothelial cell	4	0.229	0.965066	2	0.219	0.368343	4	4	0.692376	1
GO:1905244 regulation of modification of synaptic structure	4	1	1	2	0.022	0.0959513	4	4	0.8051	1
GO:1905278 positive regulation of epithelial tube formation	4	0.643	1	2	0.136	0.277003	4	4	0.672291	1
GO:1905634 regulation of protein localization to chromatin	4	0.538	1	2	0.433	0.564929	4	4	0.994091	1
GO:1905666 regulation of protein localization to endosome	5	0.039	0.438138	2	0.309	0.452503	5	4	0.740611	1
GO:1905668 positive regulation of protein localization to endosome	5	0.03	0.387772	2	0.3	0.443986	5	4	0.73322	1
GO:1905709 negative regulation of membrane permeability	5	0.03	0.387772	2	0.012	0.0697491	5	4	0.714579	1
GO:1905764 regulation of protection from non-homologous end joining at telomere	4	0.913	1	2	0.093	0.220807	4	4	0.782165	1
GO:1905765 negative regulation of protection from non-homologous end joining at telomere	4	0.901	1	2	0.094	0.221957	4	4	0.785912	1
GO:1990441 negative regulation of transcription from RNA polymerase II promoter in response to endoplasmic reticulum stress	5	0.036	0.419648	2	0.222	0.371109	5	4	0.433693	1
GO:1990481 mRNA pseudouridine synthesis	4	0.998	1	2	0.715	0.809312	4	4	0.724577	1
GO:1990791 dorsal root ganglion development	4	0.333	1	2	0.034	0.119832	4	4	0.923183	1
GO:2000002 negative regulation of DNA damage checkpoint	4	1	1	2	0.673	0.77785	4	4	0.906333	1
GO:2000523 regulation of T cell costimulation	4	0.804	1	2	0.058	0.16487	4	4	0.874158	1
GO:2000525 positive regulation of T cell costimulation	4	0.796	1	2	0.052	0.153373	4	4	0.87735	1
GO:2000546 positive regulation of endothelial cell chemotaxis to fibroblast growth factor	4	0.681	1	2	0.103	0.234317	4	4	0.909415	1
GO:2000619 negative regulation of histone H4-K16 acetylation	4	0.998	1	2	0.517	0.641141	4	4	0.835545	1
GO:2000676 positive regulation of type B pancreatic cell apoptotic process	6	0.845	1	2	0.009	0.0598675	6	4	0.977085	1
GO:2000698 positive regulation of epithelial cell differentiation involved in kidney development	7	0.888	1	2	0.003	0.0354075	7	4	0.636039	1
GO:2000741 positive regulation of mesenchymal stem cell differentiation	4	0.355	1	2	0.209	0.35849	4	4	0.904015	1
GO:2000812 regulation of barbed-end actin filament capping	5	0.901	1	2	0.276	0.421131	5	4	0.829589	1
GO:2000852 regulation of corticosterone secretion	4	0.465	1	2	0.064	0.175084	4	4	0.727844	1
GO:2000909 regulation of sterol import	5	0.621	1	2	0.336	0.478095	5	4	0.701921	1
GO:2000981 negative regulation of inner ear receptor cell differentiation	4	0.694	1	2	0.076	0.195584	4	4	0.520717	1
GO:2001025 positive regulation of response to drug	4	0.959	1	2	0.245	0.393736	4	4	0.985224	1
GO:2001137 positive regulation of endocytic recycling	4	0.593	1	2	0.356	0.495596	4	4	0.62529	1
GO:2001286 regulation of caveolin-mediated endocytosis	5	1	1	2	0.403	0.537809	5	4	0.417135	1
GO:0000214 tRNA-intron endonuclease complex	4	0.858	1	2	0.817	0.992088	4	4	0.878941	0.999642
GO:0000322 storage vacuole	4	0.79	1	2	0.049	0.217697	4	4	0.919374	0.999642
GO:0002079 inner acrosomal membrane	4	0.979	1	2	0.451	0.734932	4	4	0.83385	0.999642
GO:0002141 stereocilia ankle link	5	0.906	1	2	0.77	0.972574	5	4	0.61068	0.999642
GO:0002142 stereocilia ankle link complex	4	0.856	1	2	0.699	0.926123	4	4	0.676168	0.999642
GO:0005593 FACIT collagen trimer	4	0.734	1	2	0.048	0.215397	4	4	0.883696	0.999642
GO:0005658 alpha DNA polymerase:primase complex	5	0.926	1	2	0.441	0.729959	5	4	0.941321	0.999642
GO:0019814 immunoglobulin complex	139	1	1	2	0.992	1	139	4	0	0
GO:0030478 actin cap	4	0.641	1	2	0.865	1	4	4	0.850597	0.999642
GO:0031021 interphase microtubule organizing center	4	0.591	1	2	0.269	0.559946	4	4	0.762918	0.999642
GO:0031415 NatA complex	5	0.907	1	2	0.812	0.992088	5	4	0.658949	0.999642
GO:0032437 cuticular plate	6	0.9	1	2	0.591	0.853985	6	4	0.747853	0.999642
GO:0032541 cortical endoplasmic reticulum	4	0.66	1	2	0.521	0.79327	4	4	0.741654	0.999642
GO:0033269 internode region of axon	4	0.728	1	2	0.277	0.567342	4	4	0.543584	0.999642
GO:0034363 intermediate-density lipoprotein particle	4	0.241	1	2	0.248	0.539498	4	4	0.699563	0.999642
GO:0035363 histone locus body	4	0.992	1	2	0.363	0.660202	4	4	0.920899	0.999642
GO:0035867 alphav-beta3 integrin-IGF-1-IGF1R complex	4	0.984	1	2	0.192	0.468977	4	4	0.896252	0.999642
GO:0042105 alpha-beta T cell receptor complex	5	0.067	0.82144	2	0.049	0.217697	5	4	0.52342	0.999642
GO:0042719 mitochondrial intermembrane space protein transporter complex	4	0.611	1	2	0.132	0.393576	4	4	0.776483	0.999642
GO:0042827 platelet dense granule	4	0.465	1	2	0.542	0.813455	4	4	0.596815	0.999642
GO:0043527 tRNA methyltransferase complex	4	0.998	1	2	0.411	0.706493	4	4	0.679992	0.999642
GO:0045298 tubulin complex	4	0.084	0.91913	2	0.248	0.539498	4	4	0.57608	0.999642
GO:0070449 elongin complex	4	0.55	1	2	0.636	0.892299	4	4	0.67359	0.999642
GO:0070876 SOSS complex	4	0.999	1	2	0.833	0.995671	4	4	0.84562	0.999642
GO:0097422 tubular endosome	5	0.875	1	2	0.866	1	5	4	0.979306	0.999642
GO:0098993 anchored component of synaptic vesicle membrane	4	0.481	1	2	0.394	0.693592	4	4	0.898587	0.999642
GO:1990716 axonemal central apparatus	4	0.999	1	2	0.656	0.899859	4	4	0.764884	0.999642
GO:0000213 tRNA-intron endonuclease activity	4	0.858	1	2	0.806	0.955622	4	4	0.741654	0.99996
GO:0000293 ferric-chelate reductase activity	4	0.523	1	2	0.083	0.39494	4	4	0.935299	0.99996
GO:0000700 mismatch base pair DNA N-glycosylase activity	4	1	1	2	0.239	0.587171	4	4	0.923183	0.99996
GO:0001010 transcription factor activity, sequence-specific DNA binding transcription factor recruiting	4	0.721	1	2	0.211	0.560057	4	4	0.750914	0.99996
GO:0001083 transcription factor activity, RNA polymerase II basal transcription factor binding	4	0.676	1	2	0.848	0.974462	4	4	0.848113	0.99996
GO:0001093 TFIIB-class transcription factor binding	4	0.649	1	2	0.062	0.350137	4	4	0.888425	0.99996
GO:0001601 peptide YY receptor activity	5	0.83	1	2	0.33	0.670625	5	4	0.971898	0.99996
GO:0001609 G-protein coupled adenosine receptor activity	7	0.388	1	2	0.008	0.147365	7	4	0.730004	0.99996
GO:0002054 nucleobase binding	6	0.075	0.953946	2	0.502	0.794463	6	4	0.949567	0.99996
GO:0003836 beta-galactoside (CMP) alpha-2,3-sialyltransferase activity	4	0.128	0.99196	2	0.45	0.75357	4	4	0.784978	0.99996
GO:0003873 6-phosphofructo-2-kinase activity	4	0.797	1	2	0.532	0.810271	4	4	0.76684	0.99996
GO:0003917 DNA topoisomerase type I activity	4	0.748	1	2	0.545	0.818167	4	4	0.768786	0.99996
GO:0004028 3-chloroallyl aldehyde dehydrogenase activity	6	0.185	1	2	0.007	0.140393	6	4	0.893911	0.99996
GO:0004060 arylamine N-acetyltransferase activity	4	0.235	1	2	0	0	4	4	0.779333	0.99996
GO:0004165 dodecenoyl-CoA delta-isomerase activity	4	0.908	1	2	0.078	0.389274	4	4	0.506455	0.99996
GO:0004439 phosphatidylinositol-4,5-bisphosphate 5-phosphatase activity	6	0.832	1	2	0.517	0.801939	6	4	0.61401	0.99996
GO:0004499 N,N-dimethylaniline monooxygenase activity	9	0.941	1	2	0.251	0.603863	9	4	0.56796	0.99996
GO:0004525 ribonuclease III activity	4	0.194	1	2	0.524	0.805038	4	4	0.901693	0.99996
GO:0004594 pantothenate kinase activity	4	0.276	1	2	0.98	1	4	4	0.982266	0.99996
GO:0004691 cAMP-dependent protein kinase activity	4	0.973	1	2	0.343	0.68377	4	4	0.793315	0.99996
GO:0004723 calcium-dependent protein serine/threonine phosphatase activity	5	0.837	1	2	0.436	0.739649	5	4	0.949567	0.99996
GO:0004740 pyruvate dehydrogenase (acetyl-transferring) kinase activity	4	0.641	1	2	0.69	0.91291	4	4	0.448213	0.99996
GO:0004784 superoxide dismutase activity	5	0.96	1	2	0.039	0.279446	5	4	0.809558	0.99996
GO:0004844 uracil DNA N-glycosylase activity	4	0.922	1	2	0.523	0.805038	4	4	0.848942	0.99996
GO:0004854 xanthine dehydrogenase activity	5	0.069	0.906036	2	0.078	0.389274	5	4	0.448213	0.99996
GO:0004897 ciliary neurotrophic factor receptor activity	4	0.856	1	2	0.048	0.310733	4	4	0.874957	0.99996
GO:0004920 interleukin-10 receptor activity	5	0.932	1	2	0.228	0.580413	5	4	0.64488	0.99996
GO:0004957 prostaglandin E receptor activity	6	0.996	1	2	0.487	0.782262	6	4	0.563765	0.99996
GO:0005095 GTPase inhibitor activity	4	0.881	1	2	0.392	0.714726	4	4	0.875755	0.99996
GO:0005314 high-affinity glutamate transmembrane transporter activity	4	0.232	1	2	0.459	0.759749	4	4	0.517966	0.99996
GO:0008273 calcium, potassium:sodium antiporter activity	5	0.352	1	2	0.993	1	5	4	0.930768	0.99996
GO:0008310 single-stranded DNA 3'-5' exodeoxyribonuclease activity	4	0.01	0.509077	2	0.367	0.696051	4	4	0.612351	0.99996
GO:0008349 MAP kinase kinase kinase kinase activity	4	0.405	1	2	0.669	0.896736	4	4	0.903242	0.99996
GO:0008410 CoA-transferase activity	5	0.752	1	2	0.86	0.979696	5	4	0.797882	0.99996
GO:0008508 bile acid:sodium symporter activity	6	0.927	1	2	0.754	0.934229	6	4	0.804203	0.99996
GO:0008853 exodeoxyribonuclease III activity	4	0.006	0.413625	2	0.435	0.739121	4	4	0.957033	0.99996
GO:0010385 double-stranded methylated DNA binding	5	0.599	1	2	0.09	0.410936	5	4	0.526079	0.99996
GO:0015181 arginine transmembrane transporter activity	4	0.453	1	2	0.062	0.350137	4	4	0.583872	0.99996
GO:0015183 L-aspartate transmembrane transporter activity	4	0.999	1	2	0.813	0.958362	4	4	0.725669	0.99996
GO:0015450 P-P-bond-hydrolysis-driven protein transmembrane transporter activity	7	0.67	1	2	0.721	0.923465	7	4	0.929254	0.99996
GO:0016286 small conductance calcium-activated potassium channel activity	4	0.061	0.885303	2	0.839	0.970355	4	4	0.5932	0.99996
GO:0016312 inositol bisphosphate phosphatase activity	4	0.076	0.953946	2	0.219	0.56932	4	4	0.677448	0.99996
GO:0016531 copper chaperone activity	4	0.617	1	2	0.021	0.215627	4	4	0.815734	0.99996
GO:0016721 oxidoreductase activity, acting on superoxide radicals as acceptor	5	0.975	1	2	0.044	0.298338	5	4	0.803305	0.99996
GO:0016726 oxidoreductase activity, acting on CH or CH2 groups, NAD or NADP as acceptor	5	0.066	0.895057	2	0.087	0.404117	5	4	0.473035	0.99996
GO:0016744 transferase activity, transferring aldehyde or ketonic groups	4	0.871	1	2	0.52	0.803109	4	4	0.788702	0.99996
GO:0016972 thiol oxidase activity	4	0.866	1	2	0.446	0.749504	4	4	0.817486	0.99996
GO:0017176 phosphatidylinositol N-acetylglucosaminyltransferase activity	5	0.945	1	2	0.151	0.483651	5	4	0.744767	0.99996
GO:0019136 deoxynucleoside kinase activity	4	0.999	1	2	0.064	0.353524	4	4	0.880529	0.99996
GO:0019960 C-X3-C chemokine binding	5	0.997	1	2	0.23	0.582395	5	4	0.964475	0.99996
GO:0030620 U2 snRNA binding	5	0.432	1	2	0.528	0.80733	5	4	0.768786	0.99996
GO:0030984 kininogen binding	4	0.021	0.686774	2	0.033	0.259407	4	4	0.966704	0.99996
GO:0031705 bombesin receptor binding	4	0.086	0.953946	2	0.075	0.380496	4	4	0.595015	0.99996
GO:0031749 D2 dopamine receptor binding	6	0.969	1	2	0.097	0.417996	6	4	0.620525	0.99996
GO:0031750 D3 dopamine receptor binding	4	0.906	1	2	0.076	0.383755	4	4	0.591369	0.99996
GO:0031852 mu-type opioid receptor binding	4	0.202	1	2	0.153	0.484274	4	4	0.699563	0.99996
GO:0032138 single base insertion or deletion binding	4	0.415	1	2	0.255	0.606013	4	4	0.550568	0.99996
GO:0032296 double-stranded RNA-specific ribonuclease activity	4	0.21	1	2	0.568	0.832601	4	4	0.914022	0.99996
GO:0032564 dATP binding	4	0.906	1	2	0.093	0.414643	4	4	0.490713	0.99996
GO:0033300 dehydroascorbic acid transporter activity	4	0.961	1	2	0.465	0.76233	4	4	0.983005	0.99996
GO:0034186 apolipoprotein A-I binding	4	0.976	1	2	0	0	4	4	0.930768	0.99996
GO:0034584 piRNA binding	4	0.938	1	2	0.77	0.941282	4	4	0.930011	0.99996
GO:0034597 phosphatidylinositol-4,5-bisphosphate 4-phosphatase activity	4	0.962	1	2	0.957	1	4	4	0.860441	0.99996
GO:0034648 histone demethylase activity (H3-dimethyl-K4 specific)	4	0.863	1	2	0.98	1	4	4	0.83385	0.99996
GO:0035033 histone deacetylase regulator activity	5	0.998	1	2	0.485	0.780217	5	4	0.985963	0.99996
GO:0035252 UDP-xylosyltransferase activity	6	0.951	1	2	1	1	6	4	0.688716	0.99996
GO:0035727 lysophosphatidic acid binding	4	0.093	0.953946	2	0.111	0.435876	4	4	0.674882	0.99996
GO:0038100 nodal binding	4	0.959	1	2	0.366	0.696051	4	4	0.843116	0.99996
GO:0043199 sulfate binding	5	0.825	1	2	0.225	0.57585	5	4	0.940569	0.99996
GO:0043533 inositol 1,3,4,5 tetrakisphosphate binding	4	0.132	0.99196	2	0.178	0.5162	4	4	0.846452	0.99996
GO:0046870 cadmium ion binding	4	0.704	1	2	0.289	0.642688	4	4	0.942823	0.99996
GO:0046935 1-phosphatidylinositol-3-kinase regulator activity	5	0.977	1	2	0.41	0.722975	5	4	0.902467	0.99996
GO:0046976 histone methyltransferase activity (H3-K27 specific)	4	1	1	2	0.826	0.964416	4	4	0.901693	0.99996
GO:0047023 androsterone dehydrogenase activity	4	0.691	1	2	0.988	1	4	4	0.997046	0.99996
GO:0047238 glucuronosyl-N-acetylgalactosaminyl-proteoglycan 4-beta-N-acetylgalactosaminyltransferase activity	4	0.846	1	2	0.973	1	4	4	0.649184	0.99996
GO:0048019 receptor antagonist activity	7	0.976	1	2	0.005	0.114759	7	4	0.928497	0.99996
GO:0048248 CXCR3 chemokine receptor binding	5	0	0	2	0.201	0.546353	5	4	0.874158	0.99996
GO:0055056 D-glucose transmembrane transporter activity	4	0.97	1	2	0.466	0.763095	4	4	0.979306	0.99996
GO:0070053 thrombospondin receptor activity	4	0.116	0.987172	2	0.041	0.288007	4	4	0.752941	0.99996
GO:0070326 very-low-density lipoprotein particle receptor binding	4	0.21	1	2	0.012	0.16455	4	4	0.808669	0.99996
GO:0070815 peptidyl-lysine 5-dioxygenase activity	4	0.814	1	2	0.373	0.700353	4	4	0.810445	0.99996
GO:0071532 ankyrin repeat binding	6	0.477	1	2	0.53	0.80866	6	4	0.734285	0.99996
GO:0071987 WD40-repeat domain binding	4	1	1	2	0.088	0.407439	4	4	0.740611	0.99996
GO:0086080 protein binding involved in heterotypic cell-cell adhesion	6	0.671	1	2	0.992	1	6	4	0.672291	0.99996
GO:0090599 alpha-glucosidase activity	6	0.233	1	2	0.375	0.701002	6	4	0.864502	0.99996
GO:0097108 hedgehog family protein binding	4	0.958	1	2	0.156	0.486593	4	4	0.722381	0.99996
GO:0097506 deaminated base DNA N-glycosylase activity	4	0.923	1	2	0.521	0.803786	4	4	0.84562	0.99996
GO:0098519 nucleotide phosphatase activity, acting on free nucleotides	5	0.902	1	2	0.832	0.966426	5	4	0.79606	0.99996
GO:0102344 3-hydroxy-behenoyl-CoA dehydratase activity	4	0.138	0.999936	2	0.646	0.886913	4	4	0.824434	0.99996
GO:0102345 3-hydroxy-lignoceroyl-CoA dehydratase activity	4	0.145	0.999936	2	0.685	0.909941	4	4	0.800601	0.99996
GO:1904288 BAT3 complex binding	4	0.997	1	2	0.582	0.842193	4	4	0.595015	0.99996
GO:1905394 retromer complex binding	4	0.691	1	2	0.268	0.620696	4	4	0.814856	0.99996
GO:1990599 3' overhang single-stranded DNA endodeoxyribonuclease activity	4	0.922	1	2	0.095	0.415637	4	4	0.794232	0.99996
GO:1990715 mRNA CDS binding	4	0.983	1	2	0.17	0.506343	4	4	0.769756	0.99996
GO:0000103 sulfate assimilation	4	0.119	0.73292	3	0.612	0.725269	4	4	0.580015	1
GO:0001844 protein insertion into mitochondrial membrane involved in apoptotic signaling pathway	5	0.932	1	3	0.158	0.303428	5	4	0.857993	1
GO:0001978 regulation of systemic arterial blood pressure by carotid sinus baroreceptor feedback	5	0.895	1	3	0.002	0.0287405	5	4	0.76684	1
GO:0002003 angiotensin maturation	5	0.578	1	3	0.081	0.203107	5	4	0.857993	1
GO:0002018 renin-angiotensin regulation of aldosterone production	4	0.683	1	3	0.012	0.0697491	4	4	0.770724	1
GO:0002238 response to molecule of fungal origin	5	0.004	0.14689	3	0.318	0.461465	5	4	0.954049	1
GO:0002326 B cell lineage commitment	5	0.529	1	3	0.029	0.110371	5	4	0.741654	1
GO:0002439 chronic inflammatory response to antigenic stimulus	4	0.339	1	3	0.32	0.463741	4	4	0.473035	1
GO:0002461 tolerance induction dependent upon immune response	4	0.248	0.996234	3	0.027	0.106001	4	4	0.943574	1
GO:0002678 positive regulation of chronic inflammatory response	5	0.386	1	3	0.004	0.0409239	5	4	0.476755	1
GO:0002924 negative regulation of humoral immune response mediated by circulating immunoglobulin	4	0.012	0.265631	3	0.098	0.228041	4	4	0.822705	1
GO:0006167 AMP biosynthetic process	5	0.449	1	3	0.008	0.0565634	5	4	0.951809	1
GO:0006499 N-terminal protein myristoylation	4	0.656	1	3	0.3	0.443986	4	4	0.820102	1
GO:0006564 L-serine biosynthetic process	4	0.928	1	3	0.995	1	4	4	0.480377	1
GO:0006741 NADP biosynthetic process	4	0.781	1	3	0.577	0.694059	4	4	0.761932	1
GO:0006931 substrate-dependent cell migration, cell attachment to substrate	4	0.059	0.528297	3	0.162	0.307579	4	4	0.452697	1
GO:0006933 negative regulation of cell adhesion involved in substrate-bound cell migration	4	0.105	0.689473	3	0.016	0.0819592	4	4	0.768786	1
GO:0007223 Wnt signaling pathway, calcium modulating pathway	4	0.67	1	3	0.115	0.250492	4	4	0.815734	1
GO:0007227 signal transduction downstream of smoothened	4	0.973	1	3	0.861	0.917214	4	4	0.944324	1
GO:0008594 photoreceptor cell morphogenesis	4	0.299	1	3	0.583	0.699377	4	4	0.509414	1
GO:0009186 deoxyribonucleoside diphosphate metabolic process	6	0.204	0.918832	3	0.191	0.340329	6	4	0.926981	1
GO:0009211 pyrimidine deoxyribonucleoside triphosphate metabolic process	5	0.183	0.877764	3	0.575	0.692206	5	4	0.62529	1
GO:0009223 pyrimidine deoxyribonucleotide catabolic process	4	0.554	1	3	0.656	0.763298	4	4	0.930768	1
GO:0009240 isopentenyl diphosphate biosynthetic process	6	0.39	1	3	0.982	0.994748	6	4	0.580015	1
GO:0009405 pathogenesis	4	0.128	0.754695	3	0.077	0.196913	4	4	0.646323	1
GO:0009597 detection of virus	4	0.004	0.14689	3	0.688	0.789732	4	4	0.327411	1
GO:0009750 response to fructose	4	0.356	1	3	0.554	0.673168	4	4	0.846452	1
GO:0010519 negative regulation of phospholipase activity	5	0.428	1	3	0	0	5	4	0.670986	1
GO:0010536 positive regulation of activation of Janus kinase activity	4	0.081	0.614806	3	0.008	0.0565634	4	4	0.287858	1
GO:0010641 positive regulation of platelet-derived growth factor receptor signaling pathway	4	0.667	1	3	0.117	0.252583	4	4	0.773613	1
GO:0010887 negative regulation of cholesterol storage	4	0.933	1	3	0.349	0.489152	4	4	0.674882	1
GO:0010991 negative regulation of SMAD protein complex assembly	5	0.984	1	3	0.423	0.556414	5	4	0.46921	1
GO:0010993 regulation of ubiquitin homeostasis	5	0.477	1	3	0.736	0.824408	5	4	0.559472	1
GO:0010994 free ubiquitin chain polymerization	5	0.448	1	3	0.736	0.824408	5	4	0.56796	1
GO:0014043 negative regulation of neuron maturation	6	0.392	1	3	0.118	0.25405	6	4	0.961501	1
GO:0014826 vein smooth muscle contraction	4	0.093	0.653572	3	0.088	0.214066	4	4	0.517966	1
GO:0014873 response to muscle activity involved in regulation of muscle adaptation	4	0.736	1	3	0.174	0.321172	4	4	0.986702	1
GO:0015780 nucleotide-sugar transport	5	0.999	1	3	0.949	0.975959	5	4	0.816611	1
GO:0015822 ornithine transport	4	0.994	1	3	0.025	0.102561	4	4	0.838079	1
GO:0015961 diadenosine polyphosphate catabolic process	5	0.983	1	3	0.215	0.364136	5	4	0.87735	1
GO:0016185 synaptic vesicle budding from presynaptic endocytic zone membrane	4	0.347	1	3	0.015	0.0789584	4	4	0.598598	1
GO:0016191 synaptic vesicle uncoating	5	0.509	1	3	0.511	0.636426	5	4	0.843952	1
GO:0018214 protein carboxylation	4	0.555	1	3	0.097	0.226519	4	4	0.992614	1
GO:0018242 protein O-linked glycosylation via serine	4	0.978	1	3	0.488	0.614591	4	4	0.688716	1
GO:0018243 protein O-linked glycosylation via threonine	4	0.995	1	3	0.477	0.604835	4	4	0.657576	1
GO:0018916 nitrobenzene metabolic process	4	0.326	1	3	0.158	0.303428	4	4	0.438729	1
GO:0019659 glucose catabolic process to lactate	4	0.871	1	3	0.368	0.505987	4	4	0.856356	1
GO:0019660 glycolytic fermentation	4	0.869	1	3	0.374	0.511157	4	4	0.905561	1
GO:0019661 glucose catabolic process to lactate via pyruvate	4	0.861	1	3	0.372	0.509626	4	4	0.874158	1
GO:0019740 nitrogen utilization	5	0.518	1	3	0.032	0.115958	5	4	0.778385	1
GO:0021764 amygdala development	5	0.995	1	3	0.397	0.532587	5	4	0.743732	1
GO:0021815 modulation of microtubule cytoskeleton involved in cerebral cortex radial glia guided migration	4	0.73	1	3	0.803	0.872398	4	4	0.561631	1
GO:0021914 negative regulation of smoothened signaling pathway involved in ventral spinal cord patterning	4	0.902	1	3	0.071	0.187195	4	4	0.805994	1
GO:0021938 smoothened signaling pathway involved in regulation of cerebellar granule cell precursor cell proliferation	4	0.598	1	3	0.342	0.483027	4	4	0.699563	1
GO:0023021 termination of signal transduction	4	0.785	1	3	0.127	0.266122	4	4	0.739564	1
GO:0030538 embryonic genitalia morphogenesis	4	0.595	1	3	0.113	0.24782	4	4	0.819231	1
GO:0030886 negative regulation of myeloid dendritic cell activation	4	0.023	0.346664	3	0.037	0.125528	4	4	0.715705	1
GO:0031296 B cell costimulation	4	0.719	1	3	0.185	0.333865	4	4	0.935299	1
GO:0032237 activation of store-operated calcium channel activity	5	0.219	0.948726	3	0.599	0.714247	5	4	0.802406	1
GO:0032324 molybdopterin cofactor biosynthetic process	4	0.853	1	3	0.648	0.756737	4	4	0.605586	1
GO:0032484 Ral protein signal transduction	5	0.74	1	3	0.89	0.937825	5	4	0.723481	1
GO:0032489 regulation of Cdc42 protein signal transduction	4	0.613	1	3	0	0	4	4	0.795147	1
GO:0032497 detection of lipopolysaccharide	4	0.202	0.91371	3	0.239	0.388782	4	4	0.755961	1
GO:0032632 interleukin-3 production	5	0.033	0.400859	3	0.125	0.26336	5	4	0.71906	1
GO:0032661 regulation of interleukin-18 production	5	0.003	0.124163	3	0.046	0.14269	5	4	0.341509	1
GO:0032714 negative regulation of interleukin-5 production	5	0.969	1	3	0.254	0.402445	5	4	0.878941	1
GO:0032762 mast cell cytokine production	6	0.058	0.524518	3	0.026	0.103972	6	4	0.422924	1
GO:0032829 regulation of CD4-positive, CD25-positive, alpha-beta regulatory T cell differentiation	4	0.259	1	3	0.174	0.321172	4	4	0.526079	1
GO:0033091 positive regulation of immature T cell proliferation	5	0.952	1	3	0.045	0.140427	5	4	0.943574	1
GO:0033564 anterior/posterior axon guidance	5	0.827	1	3	0.516	0.64027	5	4	0.589521	1
GO:0035589 G-protein coupled purinergic nucleotide receptor signaling pathway	4	0.071	0.579772	3	0.355	0.494845	4	4	0.857175	1
GO:0035771 interleukin-4-mediated signaling pathway	4	0.029	0.381443	3	0.309	0.452503	4	4	0.310256	1
GO:0036481 intrinsic apoptotic signaling pathway in response to hydrogen peroxide	6	0.703	1	3	0.844	0.904414	6	4	0.712315	1
GO:0042494 detection of bacterial lipoprotein	4	0	0	3	0.537	0.657979	4	4	0.889996	1
GO:0042512 negative regulation of tyrosine phosphorylation of Stat1 protein	4	0.011	0.255982	3	0.039	0.129228	4	4	0.373707	1
GO:0042660 positive regulation of cell fate specification	4	0.567	1	3	0.099	0.229234	4	4	0.878941	1
GO:0042776 mitochondrial ATP synthesis coupled proton transport	4	0.547	1	3	0.102	0.233488	4	4	0.823571	1
GO:0042891 antibiotic transport	4	0.146	0.792429	3	0.459	0.588301	4	4	0.341509	1
GO:0042985 negative regulation of amyloid precursor protein biosynthetic process	4	0.921	1	3	0.203	0.35286	4	4	0.974122	1
GO:0043396 corticotropin-releasing hormone secretion	4	0.72	1	3	0.214	0.363588	4	4	0.682512	1
GO:0043397 regulation of corticotropin-releasing hormone secretion	4	0.73	1	3	0.174	0.321172	4	4	0.670986	1
GO:0043402 glucocorticoid mediated signaling pathway	4	0.184	0.879573	3	0.212	0.361617	4	4	0.957778	1
GO:0044854 plasma membrane raft assembly	5	0.66	1	3	0.048	0.146273	5	4	0.658949	1
GO:0044857 plasma membrane raft organization	5	0.69	1	3	0.038	0.127371	5	4	0.665704	1
GO:0045065 cytotoxic T cell differentiation	4	0.5	1	3	0.05	0.149702	4	4	0.778385	1
GO:0045085 negative regulation of interleukin-2 biosynthetic process	4	0.916	1	3	0.233	0.383244	4	4	0.545943	1
GO:0045112 integrin biosynthetic process	6	0.416	1	3	0.059	0.166175	6	4	0.930768	1
GO:0045590 negative regulation of regulatory T cell differentiation	4	0.008	0.213546	3	0.042	0.135154	4	4	0.751929	1
GO:0045916 negative regulation of complement activation	7	0.054	0.50975	3	0.023	0.0980969	7	4	0.930768	1
GO:0046490 isopentenyl diphosphate metabolic process	6	0.4	1	3	0.976	0.991137	6	4	0.62529	1
GO:0046501 protoporphyrinogen IX metabolic process	5	0.889	1	3	0.062	0.171766	5	4	0.833	1
GO:0048014 Tie signaling pathway	4	0.549	1	3	0.007	0.0532963	4	4	0.735347	1
GO:0048143 astrocyte activation	5	0.139	0.775641	3	0.416	0.549703	5	4	0.871755	1
GO:0050713 negative regulation of interleukin-1 beta secretion	4	0.126	0.752329	3	0.641	0.751125	4	4	0.541192	1
GO:0050859 negative regulation of B cell receptor signaling pathway	5	0.008	0.213546	3	0.939	0.970979	5	4	0.812214	1
GO:0051005 negative regulation of lipoprotein lipase activity	5	0.738	1	3	0.017	0.0846347	5	4	0.813096	1
GO:0051121 hepoxilin metabolic process	5	1	1	3	0.016	0.0819592	5	4	0.739564	1
GO:0051122 hepoxilin biosynthetic process	5	1	1	3	0.011	0.0665836	5	4	0.731079	1
GO:0051562 negative regulation of mitochondrial calcium ion concentration	4	0.936	1	3	0.501	0.627187	4	4	0.721278	1
GO:0051581 negative regulation of neurotransmitter uptake	4	0.097	0.664411	3	0.159	0.304184	4	4	0.643429	1
GO:0051582 positive regulation of neurotransmitter uptake	4	0.924	1	3	0.345	0.485489	4	4	0.941321	1
GO:0051593 response to folic acid	4	0.365	1	3	0.024	0.100289	4	4	0.853071	1
GO:0051612 negative regulation of serotonin uptake	4	0.111	0.708727	3	0.145	0.287935	4	4	0.653415	1
GO:0051964 negative regulation of synapse assembly	4	0.291	1	3	0.085	0.209372	4	4	0.622124	1
GO:0052055 modulation by symbiont of host molecular function	4	0.668	1	3	0.411	0.545008	4	4	0.87735	1
GO:0060051 negative regulation of protein glycosylation	4	0.907	1	3	0.636	0.746602	4	4	0.807779	1
GO:0060397 JAK-STAT cascade involved in growth hormone signaling pathway	4	0.008	0.213546	3	0.212	0.361617	4	4	0.705424	1
GO:0060486 Clara cell differentiation	4	0.816	1	3	0.132	0.272355	4	4	0.995569	1
GO:0060594 mammary gland specification	4	0.715	1	3	0.096	0.225091	4	4	0.944324	1
GO:0060648 mammary gland bud morphogenesis	4	0.637	1	3	0.116	0.251434	4	4	0.57608	1
GO:0060737 prostate gland morphogenetic growth	4	0.947	1	3	0.102	0.233488	4	4	0.962245	1
GO:0060956 endocardial cell differentiation	5	0.462	1	3	0.003	0.0354075	5	4	0.731079	1
GO:0061043 regulation of vascular wound healing	5	0.041	0.450645	3	0.115	0.250492	5	4	0.520717	1
GO:0061083 regulation of protein refolding	4	0.079	0.606877	3	0.396	0.532004	4	4	0.982266	1
GO:0061113 pancreas morphogenesis	4	0.62	1	3	0.489	0.615593	4	4	0.940569	1
GO:0061316 canonical Wnt signaling pathway involved in heart development	5	0.949	1	3	0.02	0.0915223	5	4	0.961501	1
GO:0061526 acetylcholine secretion	7	0.709	1	3	0.273	0.418717	7	4	0.970415	1
GO:0061743 motor learning	5	0.271	1	3	0.087	0.212595	5	4	0.971898	1
GO:0061762 CAMKK-AMPK signaling cascade	4	0.049	0.487926	3	0.878	0.929669	4	4	0.438729	1
GO:0070141 response to UV-A	7	0.943	1	3	0.014	0.0760606	7	4	0.56796	1
GO:0070343 white fat cell proliferation	4	0.632	1	3	0.103	0.234317	4	4	0.976345	1
GO:0070346 positive regulation of fat cell proliferation	4	0.644	1	3	0.825	0.889625	4	4	0.917848	1
GO:0070350 regulation of white fat cell proliferation	4	0.625	1	3	0.104	0.235596	4	4	0.984484	1
GO:0070424 regulation of nucleotide-binding oligomerization domain containing signaling pathway	5	0.024	0.352536	3	0.429	0.561462	5	4	0.520717	1
GO:0070432 regulation of nucleotide-binding oligomerization domain containing 2 signaling pathway	5	0.02	0.32832	3	0.45	0.579627	5	4	0.550568	1
GO:0070447 positive regulation of oligodendrocyte progenitor proliferation	4	0.773	1	3	0.225	0.37442	4	4	0.438729	1
GO:0070487 monocyte aggregation	5	0.053	0.50671	3	0.03	0.112276	5	4	0.517966	1
GO:0070662 mast cell proliferation	4	0.754	1	3	0.195	0.34436	4	4	0.947321	1
GO:0070666 regulation of mast cell proliferation	4	0.757	1	3	0.218	0.367317	4	4	0.968189	1
GO:0070668 positive regulation of mast cell proliferation	4	0.763	1	3	0.199	0.348887	4	4	0.957033	1
GO:0070945 neutrophil mediated killing of gram-negative bacterium	5	0.558	1	3	0.265	0.412368	5	4	0.927739	1
GO:0071205 protein localization to juxtaparanode region of axon	4	0.172	0.852685	3	0.343	0.483804	4	4	0.581953	1
GO:0071287 cellular response to manganese ion	4	0.551	1	3	0.335	0.477349	4	4	0.548271	1
GO:0071502 cellular response to temperature stimulus	4	0.342	1	3	0.165	0.311196	4	4	0.726758	1
GO:0071503 response to heparin	4	0.626	1	3	0.091	0.218018	4	4	0.52342	1
GO:0071504 cellular response to heparin	4	0.654	1	3	0.088	0.214066	4	4	0.483907	1
GO:0071593 lymphocyte aggregation	4	0.062	0.541052	3	0	0	4	4	0.476755	1
GO:0071724 response to diacyl bacterial lipopeptide	4	0.004	0.14689	3	0.049	0.148121	4	4	0.452697	1
GO:0071726 cellular response to diacyl bacterial lipopeptide	4	0.002	0.102468	3	0.039	0.129228	4	4	0.422924	1
GO:0072049 comma-shaped body morphogenesis	6	0.678	1	3	0.028	0.108151	6	4	0.541192	1
GO:0072198 mesenchymal cell proliferation involved in ureter development	4	1	1	3	0.028	0.108151	4	4	0.89078	1
GO:0072199 regulation of mesenchymal cell proliferation involved in ureter development	4	0.999	1	3	0.019	0.0896709	4	4	0.887639	1
GO:0072298 regulation of metanephric glomerulus development	6	0.747	1	3	0.004	0.0409239	6	4	0.828733	1
GO:0072300 positive regulation of metanephric glomerulus development	5	0.678	1	3	0.001	0.0194072	5	4	0.864502	1
GO:0072383 plus-end-directed vesicle transport along microtubule	4	0.937	1	3	0.199	0.348887	4	4	0.872557	1
GO:0072386 plus-end-directed organelle transport along microtubule	4	0.94	1	3	0.231	0.381579	4	4	0.884486	1
GO:0072530 purine-containing compound transmembrane transport	5	0.061	0.537494	3	0.987	0.997197	5	4	0.693586	1
GO:0072531 pyrimidine-containing compound transmembrane transport	4	0.985	1	3	0.791	0.863597	4	4	0.820102	1
GO:0086064 cell communication by electrical coupling involved in cardiac conduction	7	1	1	3	0.041	0.133159	7	4	0.768786	1
[truncated: 10,628 more rows]
